# Supplementary material for: Organometallic flow chemistry: solvento complexes
Source: Royal Society of Chemistry journal article supplement (doi:10.1039/d2dt02583c), 2022-01-01
Supplement: d2dt02583c1.pdf [file d2dt02583c1.pdf]

## ELECTRONIC SUPPORTING INFORMATION

Received 00th January 20xx,  
Accepted 00th January 20xx

DOI: 10.1039/x0xx00000x

### Electronic Supporting Information for: Organometallic Flow Chemistry: *Solvento* Complexes

Benjamin J. Frogley,<sup>a</sup> Anthony F. Hill,<sup>\*a</sup> Hideki Onagi<sup>a</sup> and Lachlan J. Watson<sup>a</sup>

#### Experimental

##### General Considerations

Infrared spectra were obtained using a PerkinElmer Spectrum One FT-IR spectrometer. The strengths of IR absorptions are denoted by the abbreviations vs (very strong), s (strong), m (medium), w (weak), sh (shoulder) and br (broad). NMR spectra were obtained on Varian 400 (<sup>1</sup>H at 399.8, <sup>13</sup>C at 100.5), Bruker Avance 400 (<sup>1</sup>H at 400.1 MHz, <sup>13</sup>C at 100.6 MHz, <sup>31</sup>P at 162.0 MHz), Bruker Avance 600 (<sup>1</sup>H at 600.0 MHz, <sup>13</sup>C at 150.9 MHz) or a Bruker Avance 700 (<sup>1</sup>H at 700.0 MHz, <sup>13</sup>C at 176.1 MHz) spectrometers at the temperatures indicated. Chemical shifts ( $\delta$ ) are reported in ppm with coupling constants given in Hz and are referenced to the solvent peak, or external references (85% H<sub>3</sub>PO<sub>4</sub> in H<sub>2</sub>O for <sup>31</sup>P). The multiplicities of NMR resonances are denoted by the abbreviations s (singlet), d (doublet), t (triplet), m (multiplet), br (broad) and combinations thereof for more highly coupled systems. Where applicable, the stated multiplicity refers to that of the primary resonance exclusive of <sup>183</sup>W satellites. In some cases, distinct peaks were observed in the <sup>1</sup>H and <sup>13</sup>C{<sup>1</sup>H} NMR spectra, but to the level of accuracy that is reportable (i.e. 2 decimal places for <sup>1</sup>H NMR, 1 decimal place for <sup>13</sup>C NMR) they are reported as having the same chemical shift. High-resolution electrospray ionisation mass spectrometry (ESI-MS) was performed by the ANU Research School of Chemistry mass spectrometry service with acetonitrile, dichloromethane or methanol as the matrix.

The data for each complex are consistent with those previously reported for each complex: [W(CO)<sub>5</sub>(PPh<sub>3</sub>)],<sup>1</sup> [Mo(CO)<sub>5</sub>(PPh<sub>3</sub>)],<sup>1</sup> [Cr(CO)<sub>5</sub>(PPh<sub>3</sub>)],<sup>1</sup> [Mn(Cp')(CO)<sub>2</sub>(PPh<sub>3</sub>)],<sup>2</sup> and [Re(Cp\*)(CO)<sub>2</sub>(PPh<sub>3</sub>)].<sup>3</sup> Crude NMR spectra are provided along with the isolated products for context.

##### Computational Details

Computational studies were performed by using the SPARTAN20<sup>®</sup> suite of programs.<sup>4</sup> Geometry optimisation (gas phase) for diatomics and metal complexes was performed at the DFT level of theory using the exchange functionals  $\omega$ B97X-D of Head-Gordon.<sup>5,6</sup> The Los Alamos effective core potential type basis set (LANL2DZ) of Hay and Wadt<sup>7-9</sup> was used for I, Mo and W while Pople 6-31G\* basis sets<sup>10</sup> were used for all other atoms. Frequency calculations were performed for all compounds to confirm that each optimized structure was a local minimum and also to identify vibrational modes of interest. Cartesian atomic coordinates are provided below.

##### General synthetic strategy

Following the quenching of *solvento* complexes with PPh<sub>3</sub>, the solutions were worked with under atmospheric conditions. Mixtures were recrystallised from Et<sub>2</sub>O/hexane or subjected to column chromatography for purification (neutral alumina, gradient elution with petroleum spirits (40-60 °C or 60-80 °C)/diethyl ether or petroleum spirits (40-60 °C/CH<sub>2</sub>Cl<sub>2</sub>).

##### Data for known compounds

**[W(CO)<sub>5</sub>(PPh<sub>3</sub>)]:** IR (THF, cm<sup>-1</sup>): 2072 m, 1983 w, 1940 vs;  $\nu_{\text{CO}}$ . <sup>1</sup>H NMR (400 MHz, CDCl<sub>3</sub>, 298 K):  $\delta_{\text{H}}$  = 7.48 (m, 15 H, PPh<sub>3</sub>). <sup>31</sup>P{<sup>1</sup>H} NMR (162 MHz, CDCl<sub>3</sub>, 298 K):  $\delta_{\text{P}}$  = 20.85 (<sup>1</sup>J<sub>WP</sub> = 244 Hz). <sup>13</sup>C{<sup>1</sup>H} NMR (150 MHz, CDCl<sub>3</sub>, 298 K):  $\delta_{\text{C}}$  = 199.32 (d, <sup>2</sup>J<sub>PC</sub> = 7 Hz, <sup>1</sup>J<sub>WC</sub> = 72 Hz, *trans*-WCO), 197.40 (d, <sup>2</sup>J<sub>PC</sub> = 7 Hz, <sup>1</sup>J<sub>WC</sub> = 63 Hz, *cis*-WCO), 135.4 (d, <sup>1</sup>J<sub>PC</sub> = 41 Hz, *i*-PPh<sub>3</sub>), 133.1 (d, <sup>2</sup>J<sub>PC</sub> = 12 Hz, *o*-PPh<sub>3</sub>), 130.5 (d, <sup>4</sup>J<sub>PC</sub> = 2 Hz, *p*-PPh<sub>3</sub>), 128.8 (d, <sup>3</sup>J<sub>PC</sub> = 10 Hz, *m*-PPh<sub>3</sub>). No discernible fragments were observed in the ESI-MS (+ve ion) spectrum other than [PPh<sub>3</sub> + H]<sup>+</sup>.

<sup>a</sup> Research School of Chemistry, Australian National University, Canberra, Australian Capital Territory, ACT 2601, Australia.

\* Corresponding author. E-mail: a.hill@anu.edu.au

CCDC 1949481–1949485 contain the supplementary crystallographic data for this paper, and are available free of charge from The Cambridge Crystallographic Data Centre.

**[Mo(CO)<sub>5</sub>(PPh<sub>3</sub>)]:** IR (THF, cm<sup>-1</sup>): 2072 m, 1988 w, 1947 vs; ν<sub>CO</sub>. <sup>1</sup>H NMR (400 MHz, CDCl<sub>3</sub>, 298 K): δ<sub>H</sub> = 7.44 (m, 15 H, PPh<sub>3</sub>). <sup>31</sup>P{<sup>1</sup>H} NMR (162 MHz, CDCl<sub>3</sub>, 298 K): δ<sub>P</sub> = 37.68. <sup>13</sup>C{<sup>1</sup>H} NMR (150 MHz, CDCl<sub>3</sub>, 298 K): δ<sub>C</sub> = 210.4 (d, <sup>2</sup>J<sub>PC</sub> = 23 Hz, *trans*-MoCO), 205.8 (d, <sup>2</sup>J<sub>PC</sub> = 9 Hz, *cis*-MoCO), 135.6 (d, <sup>1</sup>J<sub>PC</sub> = 35 Hz, *i*-PPh<sub>3</sub>), 133.0 (d, <sup>2</sup>J<sub>PC</sub> = 13 Hz, *o*-PPh<sub>3</sub>), 130.2 (d, <sup>4</sup>J<sub>PC</sub> = 2 Hz, *p*-PPh<sub>3</sub>), 128.7 (d, <sup>3</sup>J<sub>PC</sub> = 9 Hz, *m*-PPh<sub>3</sub>). This compound was not amenable to ESI-MS spectroscopic conditions.

**[Cr(CO)<sub>5</sub>(PPh<sub>3</sub>)]:** IR (THF, cm<sup>-1</sup>): 2063 m, 1983 w, 1942 vs; ν<sub>CO</sub>. <sup>1</sup>H NMR (400 MHz, CDCl<sub>3</sub>, 298 K): δ<sub>H</sub> = 7.44 (m, 15 H, PPh<sub>3</sub>). <sup>31</sup>P{<sup>1</sup>H} NMR (162 MHz, CDCl<sub>3</sub>, 298 K): δ<sub>P</sub> = 55.89. <sup>13</sup>C{<sup>1</sup>H} NMR (150 MHz, CDCl<sub>3</sub>, 298 K): δ<sub>C</sub> = 221.7 (d, <sup>2</sup>J<sub>PC</sub> = 7 Hz, *trans*-CrCO), 216.9 (d, <sup>2</sup>J<sub>PC</sub> = 13 Hz, *cis*-CrCO), 135.5 (d, <sup>1</sup>J<sub>PC</sub> = 36 Hz, *i*-PPh<sub>3</sub>), 132.9 (d, <sup>2</sup>J<sub>PC</sub> = 11 Hz, *o*-PPh<sub>3</sub>), 130.3 (s, *p*-PPh<sub>3</sub>), 128.7 (d, <sup>3</sup>J<sub>PC</sub> = 10 Hz, *m*-PPh<sub>3</sub>). This compound was not amenable to ESI-MS spectroscopic conditions.

**[Mn(Cp\*)(CO)<sub>2</sub>(PPh<sub>3</sub>)]:** IR (THF, cm<sup>-1</sup>): 1933, 1870 ν<sub>CO</sub>. <sup>1</sup>H NMR (400 MHz, CDCl<sub>3</sub>, 298 K): δ<sub>H</sub> = 7.47 (m, 15 H, PPh<sub>3</sub>), 4.19, 4.05 (2 x brs, 2 x 2 H, C<sub>5</sub>H<sub>4</sub>CH<sub>3</sub>), 1.95 (s, 3 H, C<sub>5</sub>H<sub>4</sub>CH<sub>3</sub>). <sup>31</sup>P{<sup>1</sup>H} NMR (162 MHz, CDCl<sub>3</sub>, 298 K): δ<sub>P</sub> = 92.73. <sup>13</sup>C{<sup>1</sup>H} NMR (150 MHz, CDCl<sub>3</sub>, 298 K): δ<sub>C</sub> = 233.1 (d, <sup>2</sup>J<sub>PC</sub> = 24 Hz, MnCO), 138.4 (d, <sup>1</sup>J<sub>PC</sub> = 40 Hz, *i*-PPh<sub>3</sub>), 133.0 (d, <sup>2</sup>J<sub>PC</sub> = 10 Hz, *o*-PPh<sub>3</sub>), 129.5 (d, <sup>4</sup>J<sub>PC</sub> = 2 Hz, *p*-PPh<sub>3</sub>), 128.2 (d, <sup>3</sup>J<sub>PC</sub> = 9 Hz, *m*-PPh<sub>3</sub>), 99.1 (C<sub>4</sub>H<sub>4</sub>CCH<sub>3</sub>), 83.2, 82.0 (2 x s, C<sub>4</sub>H<sub>4</sub>CCH<sub>3</sub>), 13.9 (C<sub>4</sub>H<sub>4</sub>CCH<sub>3</sub>). MS (ESI, +ve ion, *m/z*): Found: 452.0730. Calcd for C<sub>26</sub>H<sub>22</sub><sup>55</sup>MnO<sub>2</sub>P [M+Na]<sup>+</sup>: 452.0738.

**[Re(Cp\*)(CO)<sub>2</sub>(PPh<sub>3</sub>)]:** IR (THF, cm<sup>-1</sup>): 1918, 1855 ν<sub>CO</sub>. <sup>1</sup>H NMR (700 MHz, CDCl<sub>3</sub>, 298 K): δ<sub>H</sub> = 7.45, 7.35 (2 x m, 15 H, PPh<sub>3</sub>), 1.82 (s, 15 H, Cp\*). <sup>31</sup>P{<sup>1</sup>H} NMR (283 MHz, CDCl<sub>3</sub>, 298 K): δ<sub>P</sub> = 33.50. <sup>13</sup>C{<sup>1</sup>H} NMR (176 MHz, CDCl<sub>3</sub>, 298 K): δ<sub>C</sub> = 206.7 (d, <sup>2</sup>J<sub>PC</sub> = 8 Hz, ReCO), 137.8 (d, <sup>1</sup>J<sub>PC</sub> = 50 Hz, *i*-PPh<sub>3</sub>), 133.5 (d, <sup>2</sup>J<sub>PC</sub> = 11 Hz, *o*-PPh<sub>3</sub>), 129.5 (d, <sup>4</sup>J<sub>PC</sub> = 2 Hz, *p*-PPh<sub>3</sub>), 128.0 (d, <sup>3</sup>J<sub>PC</sub> = 10 Hz, *m*-PPh<sub>3</sub>), 95.6 (C<sub>5</sub>(CH<sub>3</sub>)<sub>5</sub>), 10.5 (C<sub>5</sub>(CH<sub>3</sub>)<sub>5</sub>). MS (ESI, +ve ion, *m/z*): Found: 641.1621. Calcd for C<sub>30</sub>H<sub>31</sub>O<sub>2</sub>P<sup>187</sup>Re [M+H]<sup>+</sup>: 641.1620.

## Optimised Geometries and Cartesian Coordinates

### [W(CO)<sub>6</sub>]

Optimised structure of [W(CO)<sub>6</sub>] in the gas phase

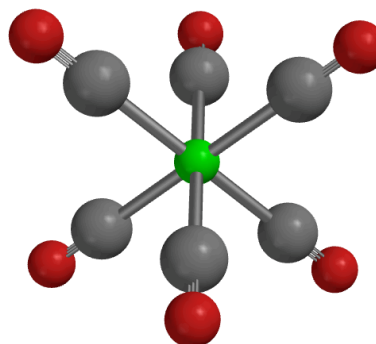

Cartesian coordinates of optimised [W(CO)<sub>6</sub>]

| Atom | X         | Y         | Z         |
|------|-----------|-----------|-----------|
| W    | -0.000002 | -0.000020 | -0.000000 |
| C    | 0.000000  | 2.060635  | 0.000000  |
| O    | 0.000002  | 3.206866  | 0.000000  |
| C    | 2.060652  | 0.000002  | 0.000000  |
| O    | 3.206883  | 0.000022  | 0.000000  |
| C    | -2.060656 | 0.000002  | 0.000000  |
| O    | -3.206887 | 0.000022  | 0.000000  |
| C    | 0.000000  | -2.060672 | 0.000000  |
| O    | 0.000002  | -3.206903 | 0.000000  |
| C    | 0.000000  | 0.000002  | 2.060654  |
| O    | 0.000002  | 0.000022  | 3.206885  |
| C    | 0.000000  | 0.000002  | -2.060654 |
| O    | 0.000002  | 0.000022  | -3.206885 |

**[W(CO)<sub>5</sub>(OMe<sub>2</sub>)]**Optimised structure of [W(CO)<sub>5</sub>(OMe<sub>2</sub>)] in the gas phase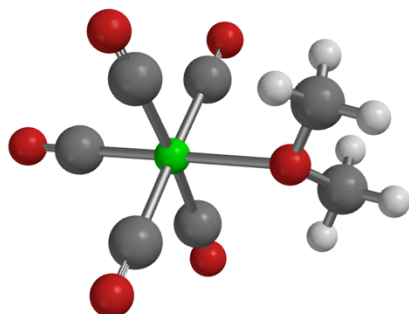Cartesian coordinates of optimised [W(CO)<sub>5</sub>(OMe<sub>2</sub>)]

| Atom | X         | Y         | Z         |
|------|-----------|-----------|-----------|
| W    | -0.155744 | 0.000002  | -1.108709 |
| C    | -0.793329 | -0.000007 | -2.979051 |
| O    | -1.170629 | -0.000010 | -4.073487 |
| C    | 1.801128  | 0.000004  | -1.739658 |
| O    | 2.887040  | 0.000005  | -2.114183 |
| C    | -2.086037 | 0.000001  | -0.425154 |
| O    | -3.176044 | -0.000000 | -0.055193 |
| C    | -0.175110 | 2.046512  | -1.184047 |
| O    | -0.202547 | 3.193268  | -1.280630 |
| C    | -0.175115 | -2.046508 | -1.184049 |
| O    | -0.202554 | -3.193264 | -1.280632 |
| O    | 0.627127  | 0.000000  | 1.127846  |
| C    | 0.391755  | -1.176305 | 1.895279  |
| H    | 0.732339  | -2.025689 | 1.305321  |

|   |           |           |          |
|---|-----------|-----------|----------|
| H | -0.677255 | -1.282021 | 2.119333 |
| H | 0.964068  | -1.128100 | 2.828536 |
| C | 0.391755  | 1.176305  | 1.895281 |
| H | 0.732339  | 2.025688  | 1.305323 |
| H | 0.964068  | 1.128098  | 2.828538 |
| H | -0.677255 | 1.282020  | 2.119334 |

## References

1. M. F. Guns, E. G. Claeys and G. P. Van Der Kelen, *Journal of Molecular Structure*, 1979, **54**, 101-109.
2. D. A. Edwards and J. Marshalsea, *J. Organomet. Chem*, 1975, **96**, C50-C52.
3. R. J. Angleici, G. Facchin and M. M. Singh, *Synth. React. Inorg. Met. Org. Chem*, 1990, **20**, 275.
4. *Spartan 20<sup>®</sup>* (2020) Wavefunction, Inc., 18401 Von Karman Ave., Suite 370 Irvine, CA 92612 U.S.A.
5. J. D. Chai and M. Head-Gordon, *J Chem Phys.*, 2008, **128**, 084106.
6. J. D. Chai and M. Head-Gordon, *Phys Chem Chem Phys*, 2008, **10**, 6615-6620.
7. P. J. Hay and W. R. Wadt, *J. Chem. Phys.*, 1985, **82**, 270-283.
8. P. J. Hay and W. R. Wadt, *J. Chem. Phys.*, 1985, **82**, 299-310.
9. W. R. Wadt and P. J. Hay, *J. Chem. Phys.*, 1985, **82**, 284-298.
10. W. J. Hehre, R. Ditchfeld and J. A. Pople, *J. Chem. Phys.*, 1972, **56**, 2257-2261.

## ELECTRONIC SUPPORTING INFORMATION

## System overview

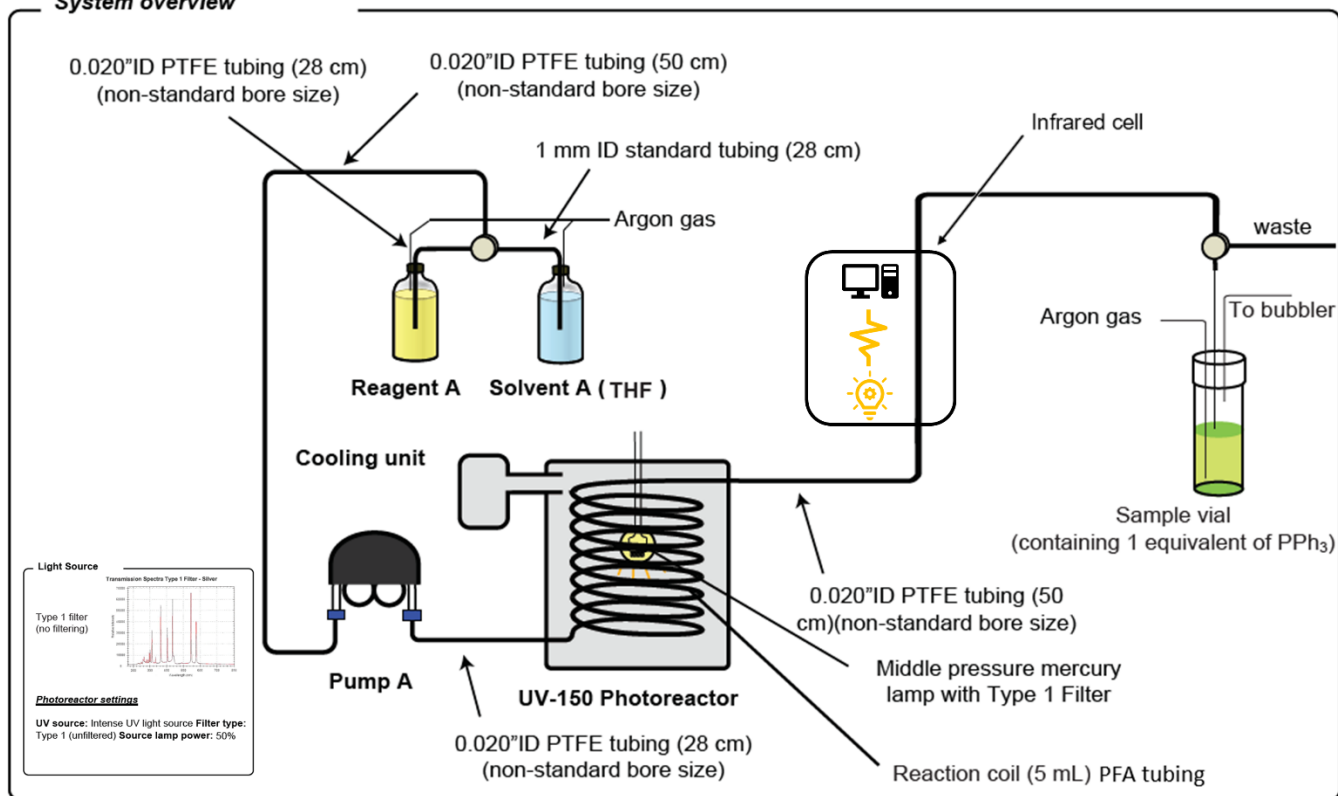

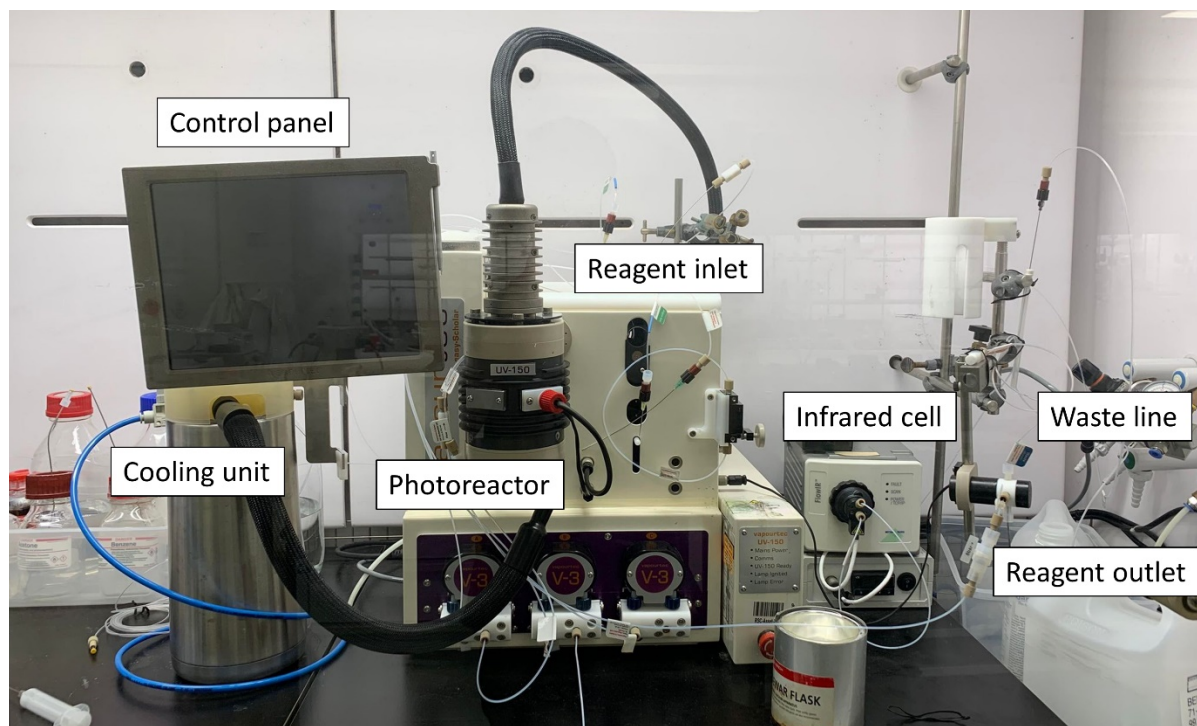

## ELECTRONIC SUPPORTING INFORMATION

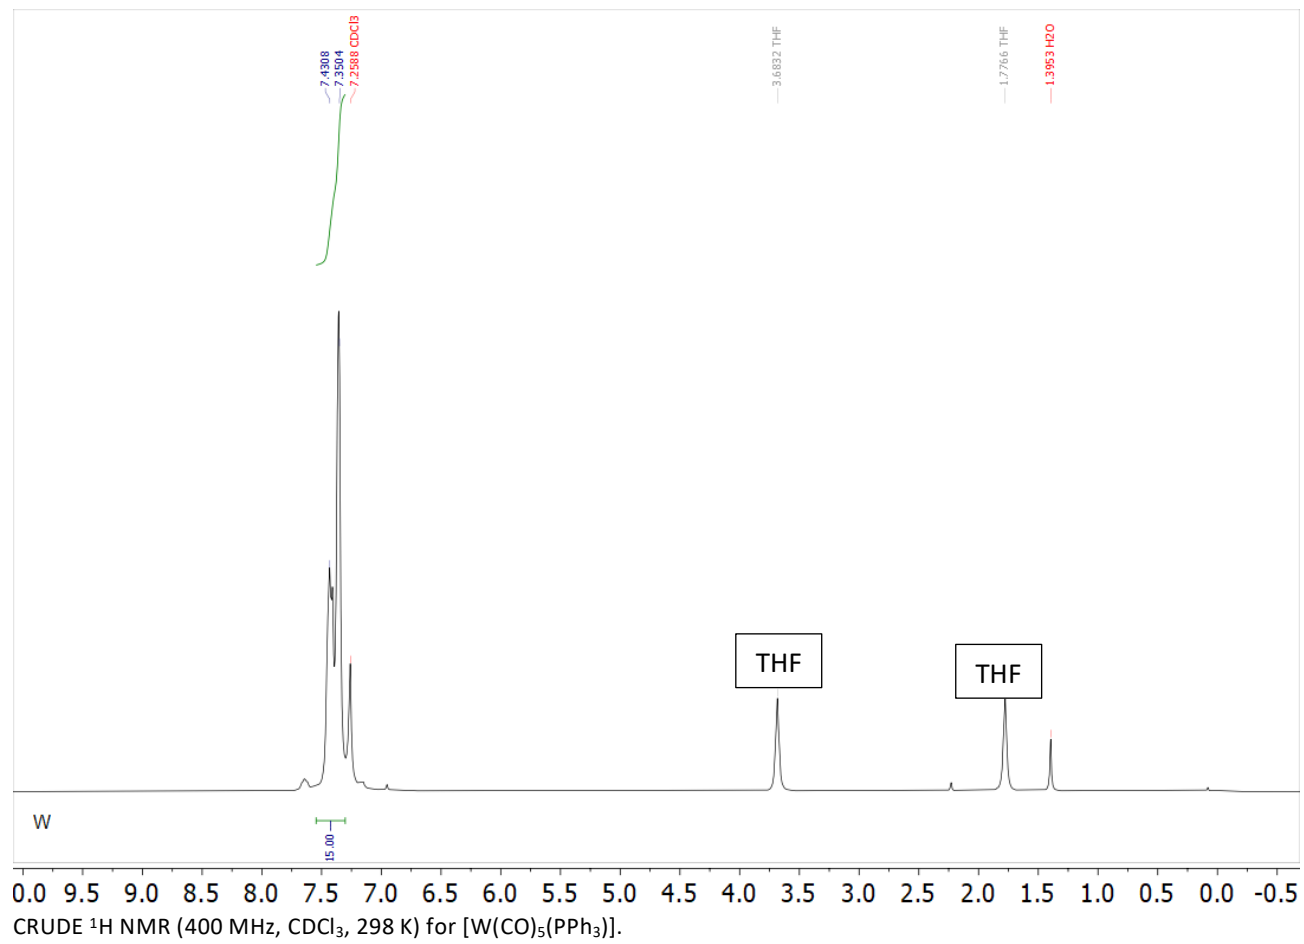

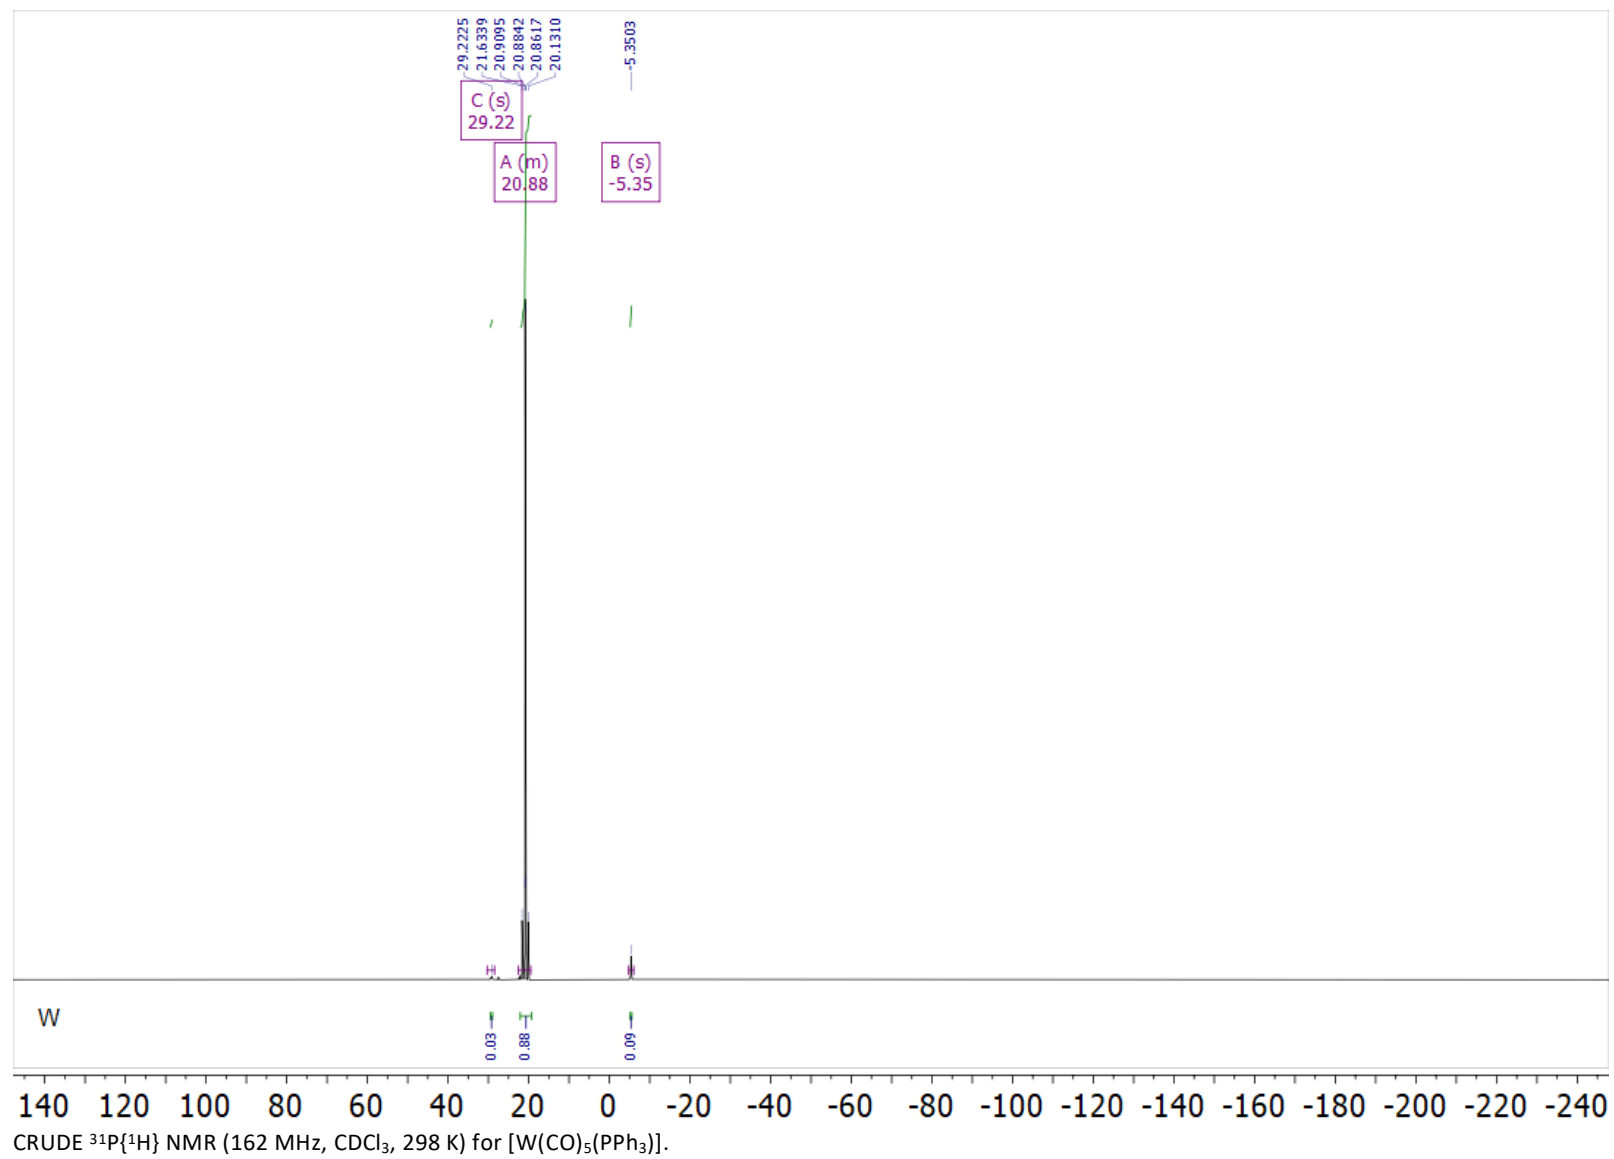

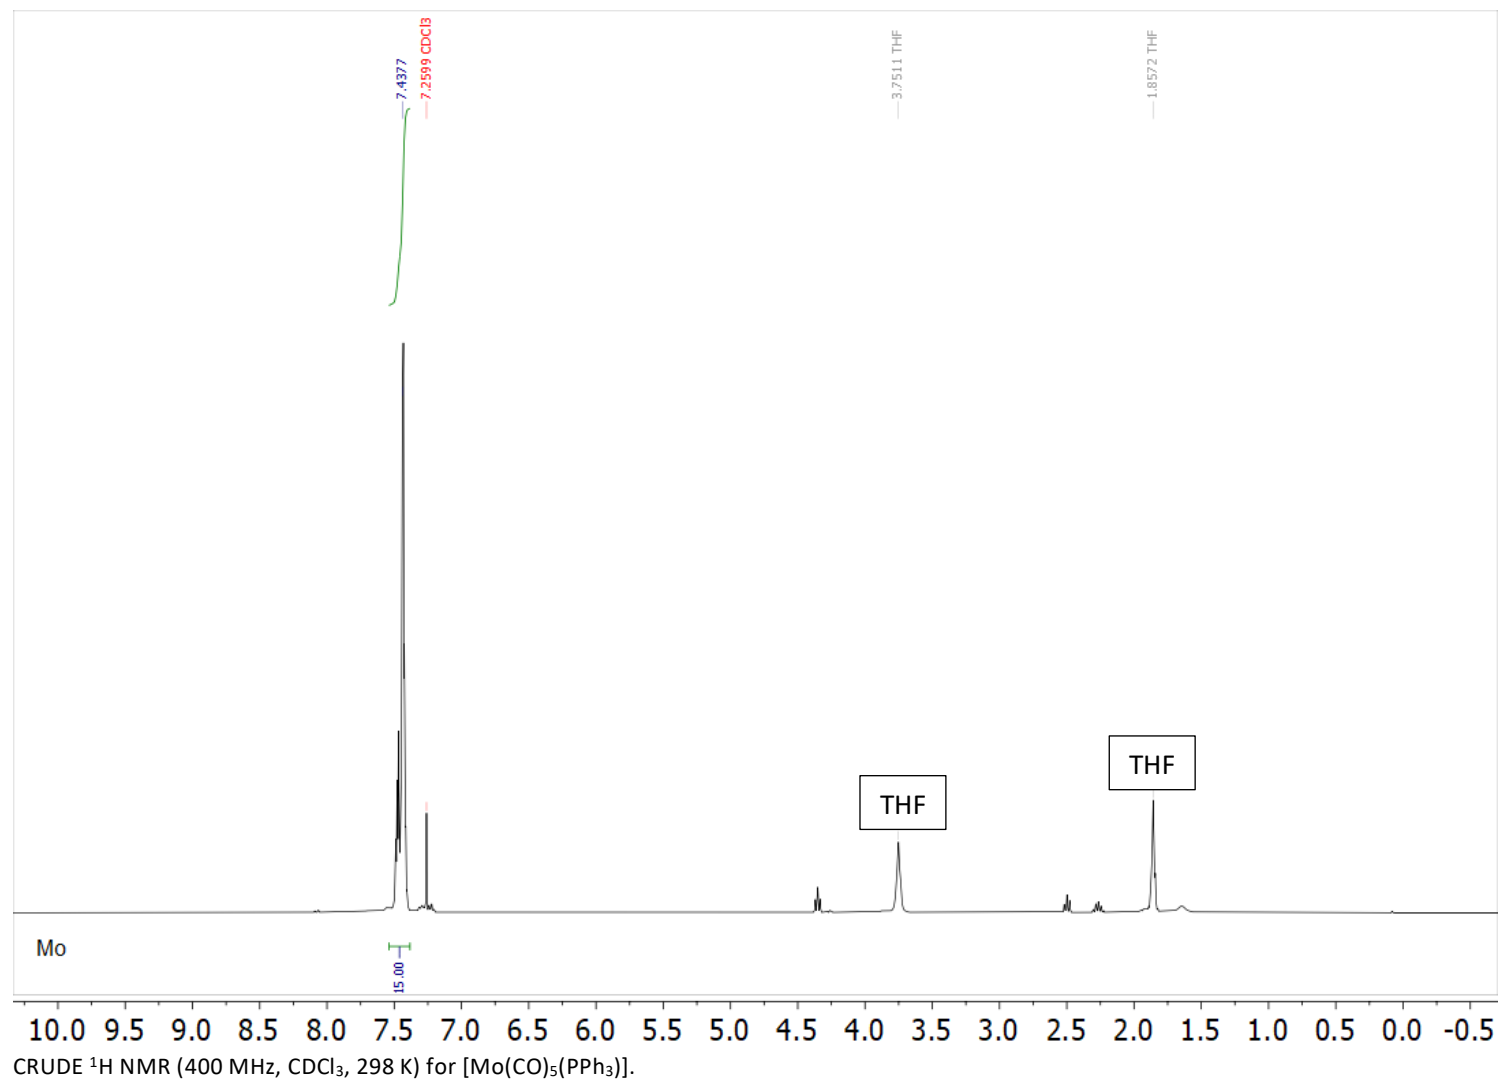



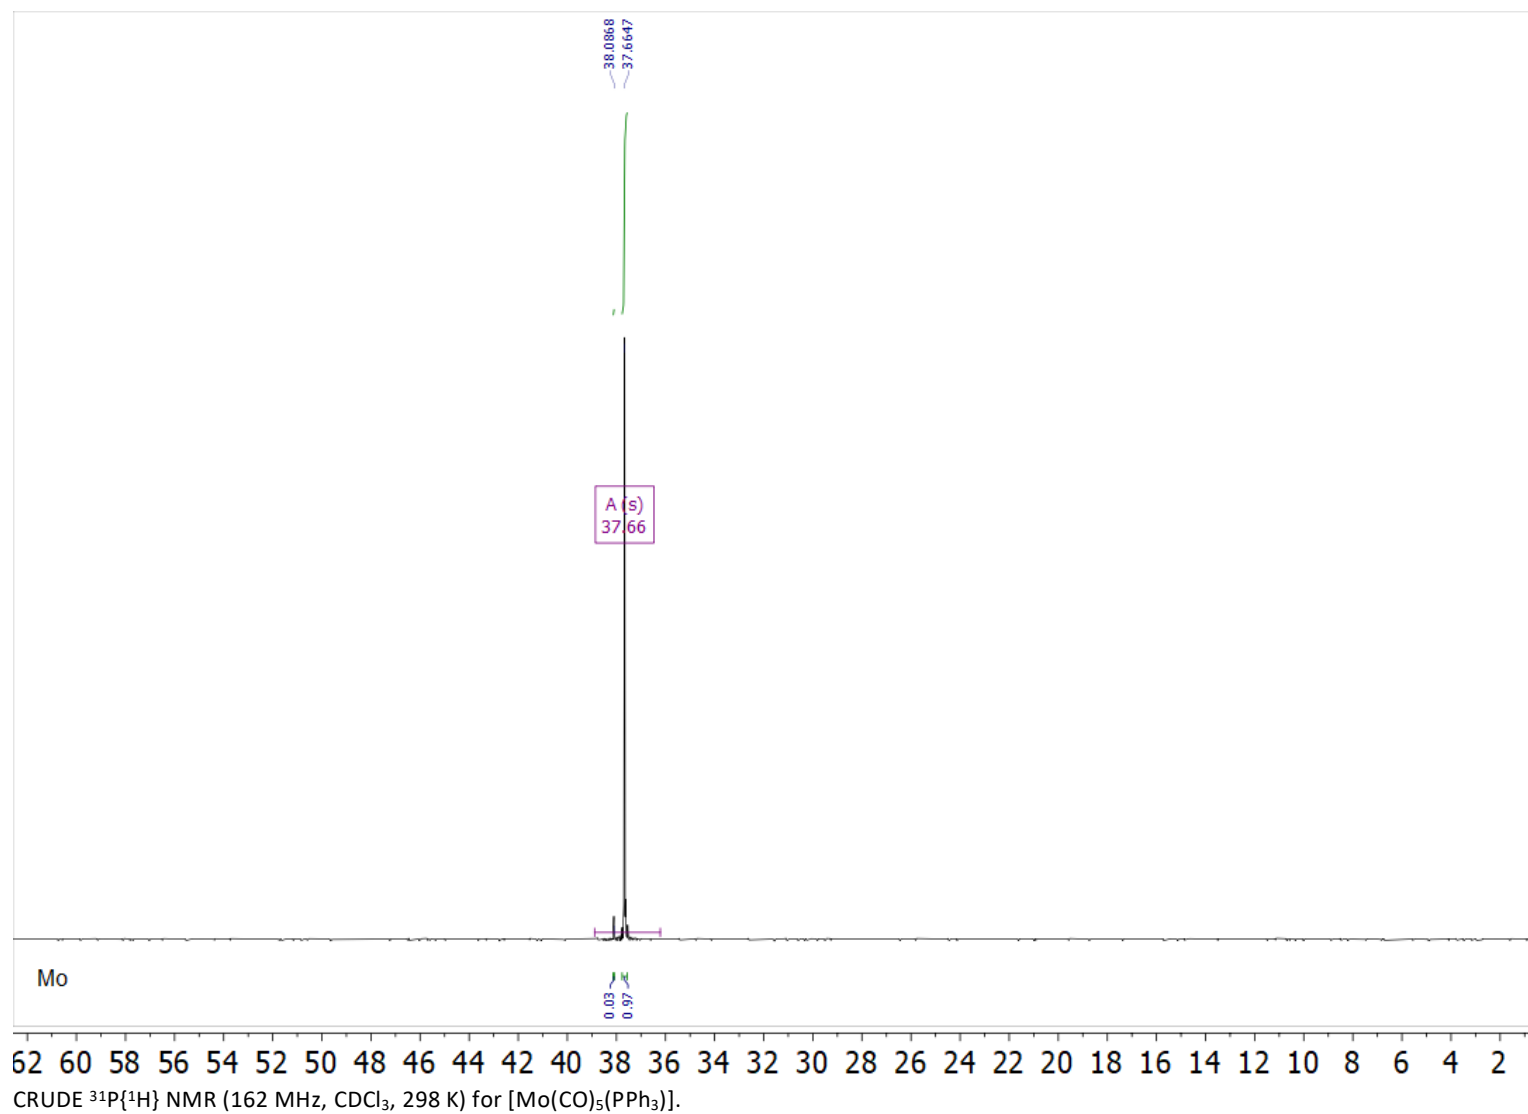

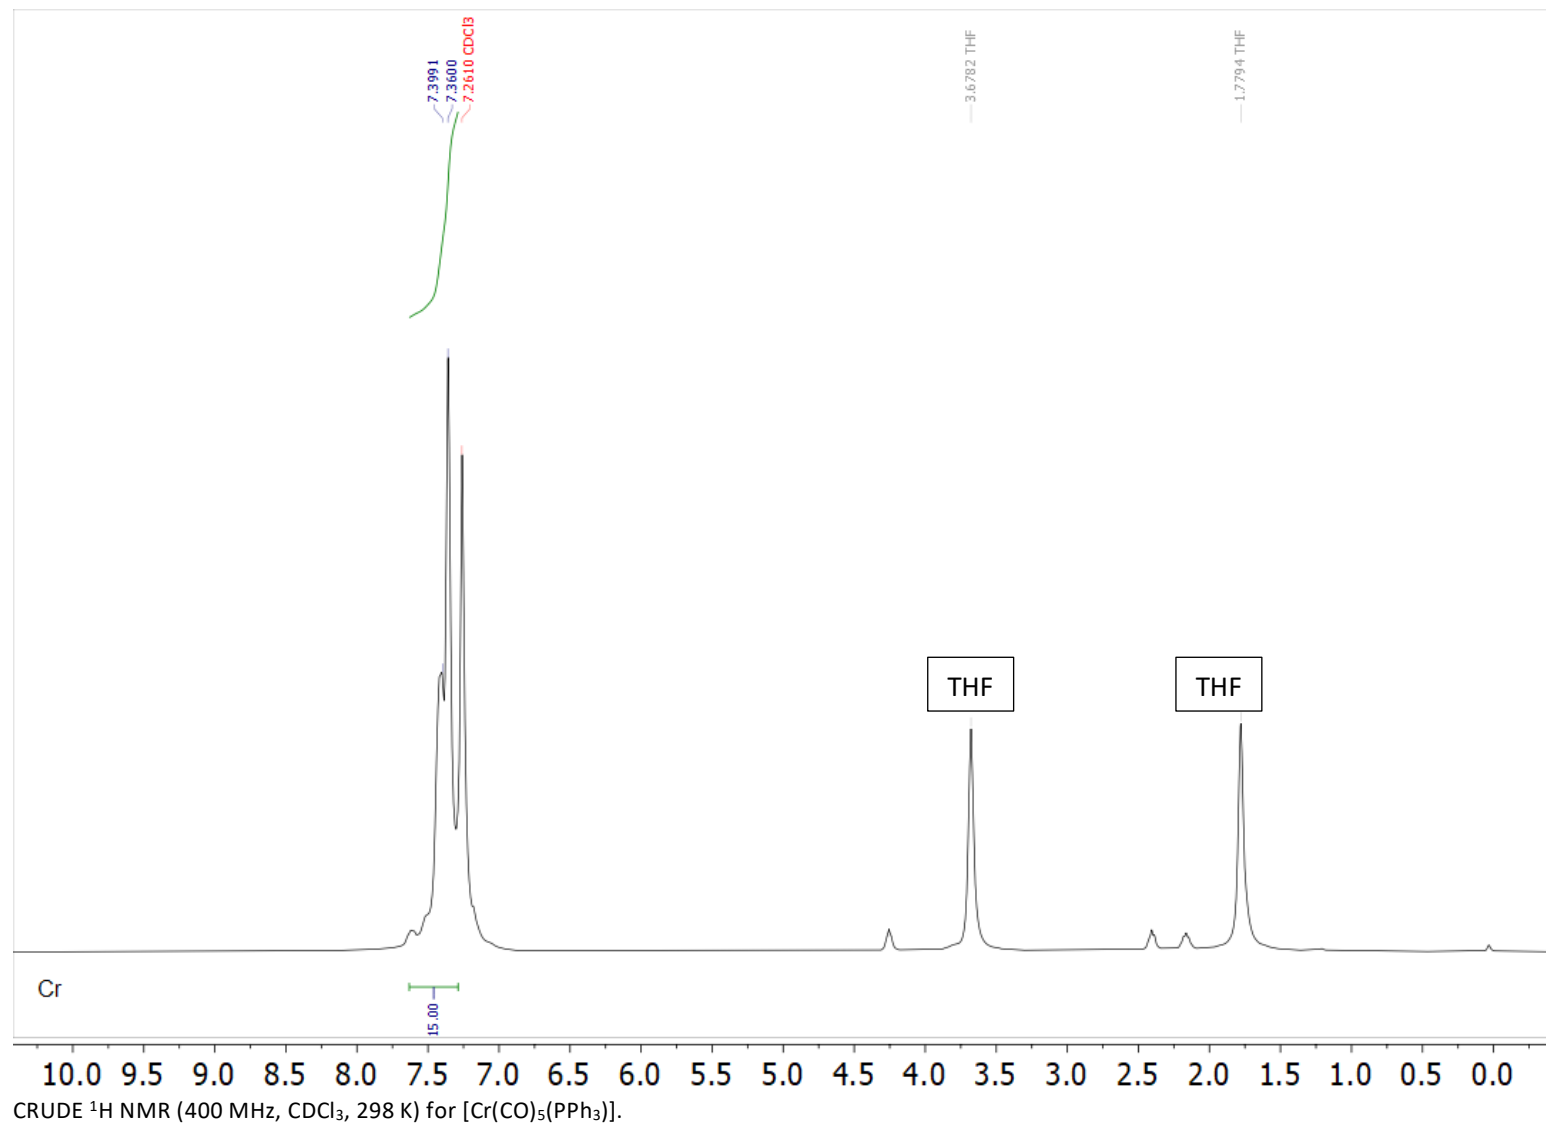

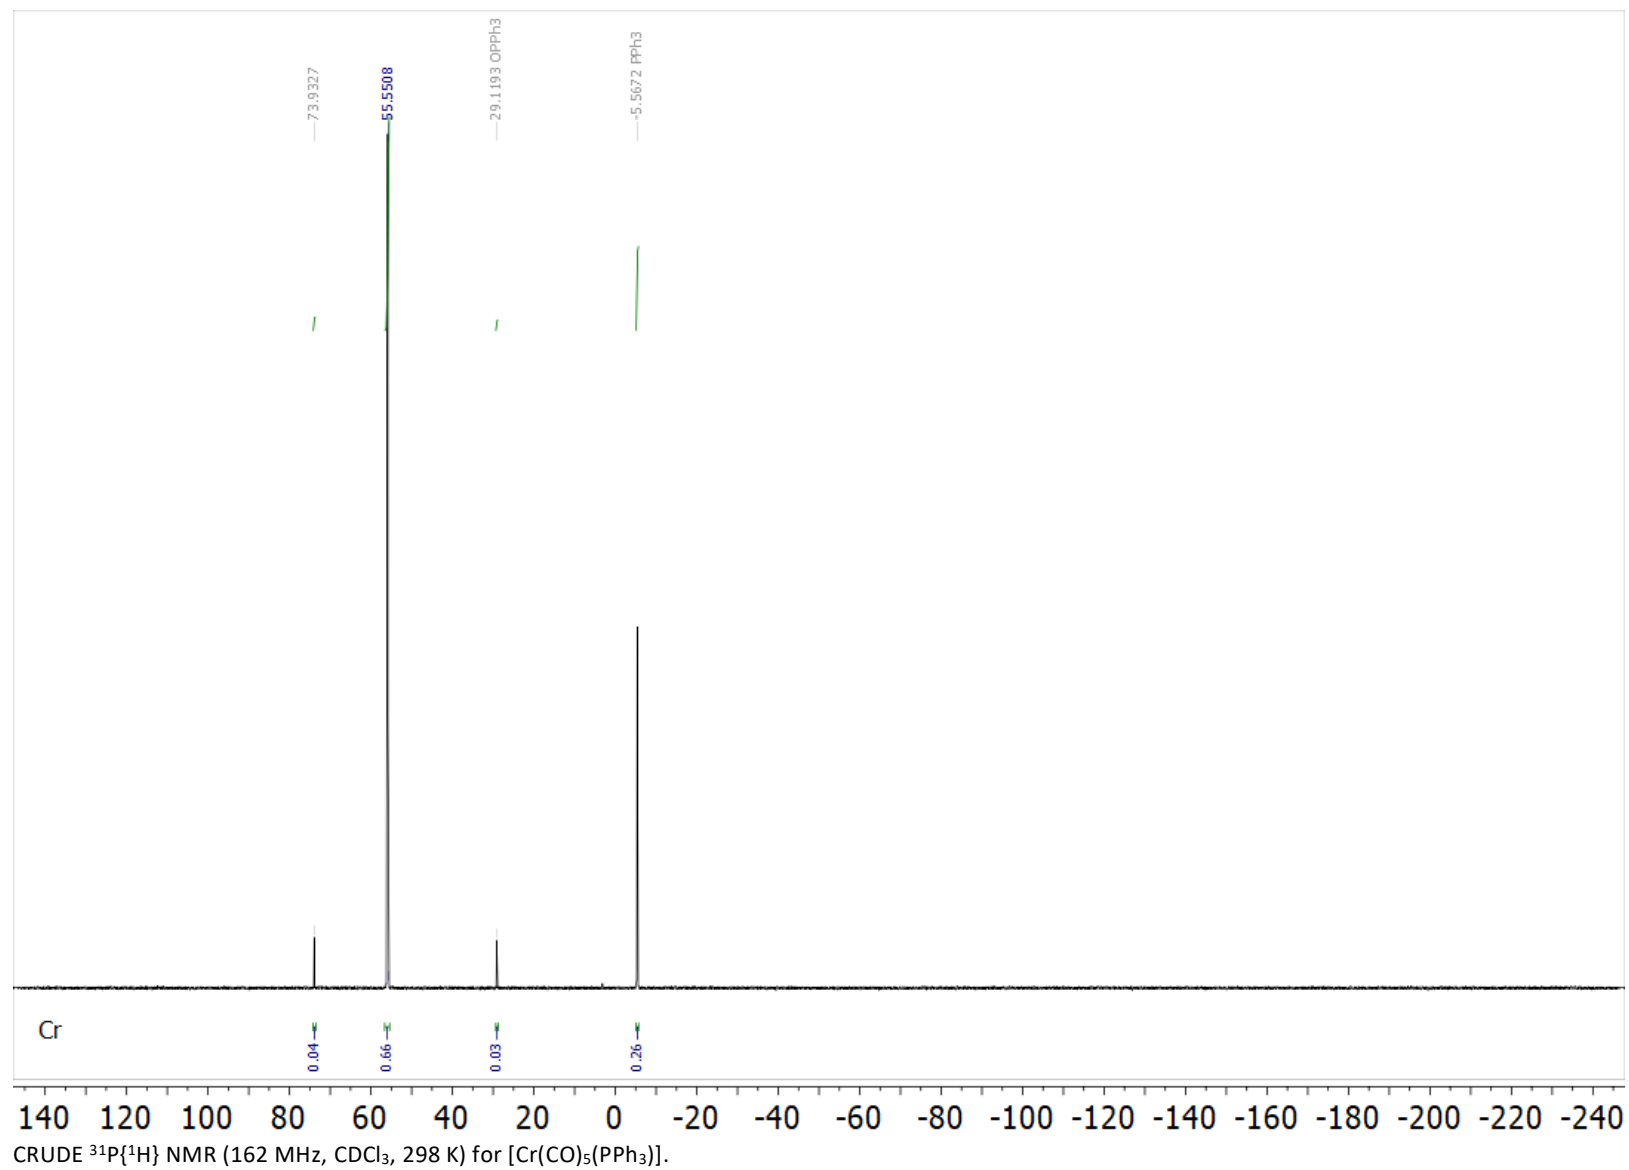

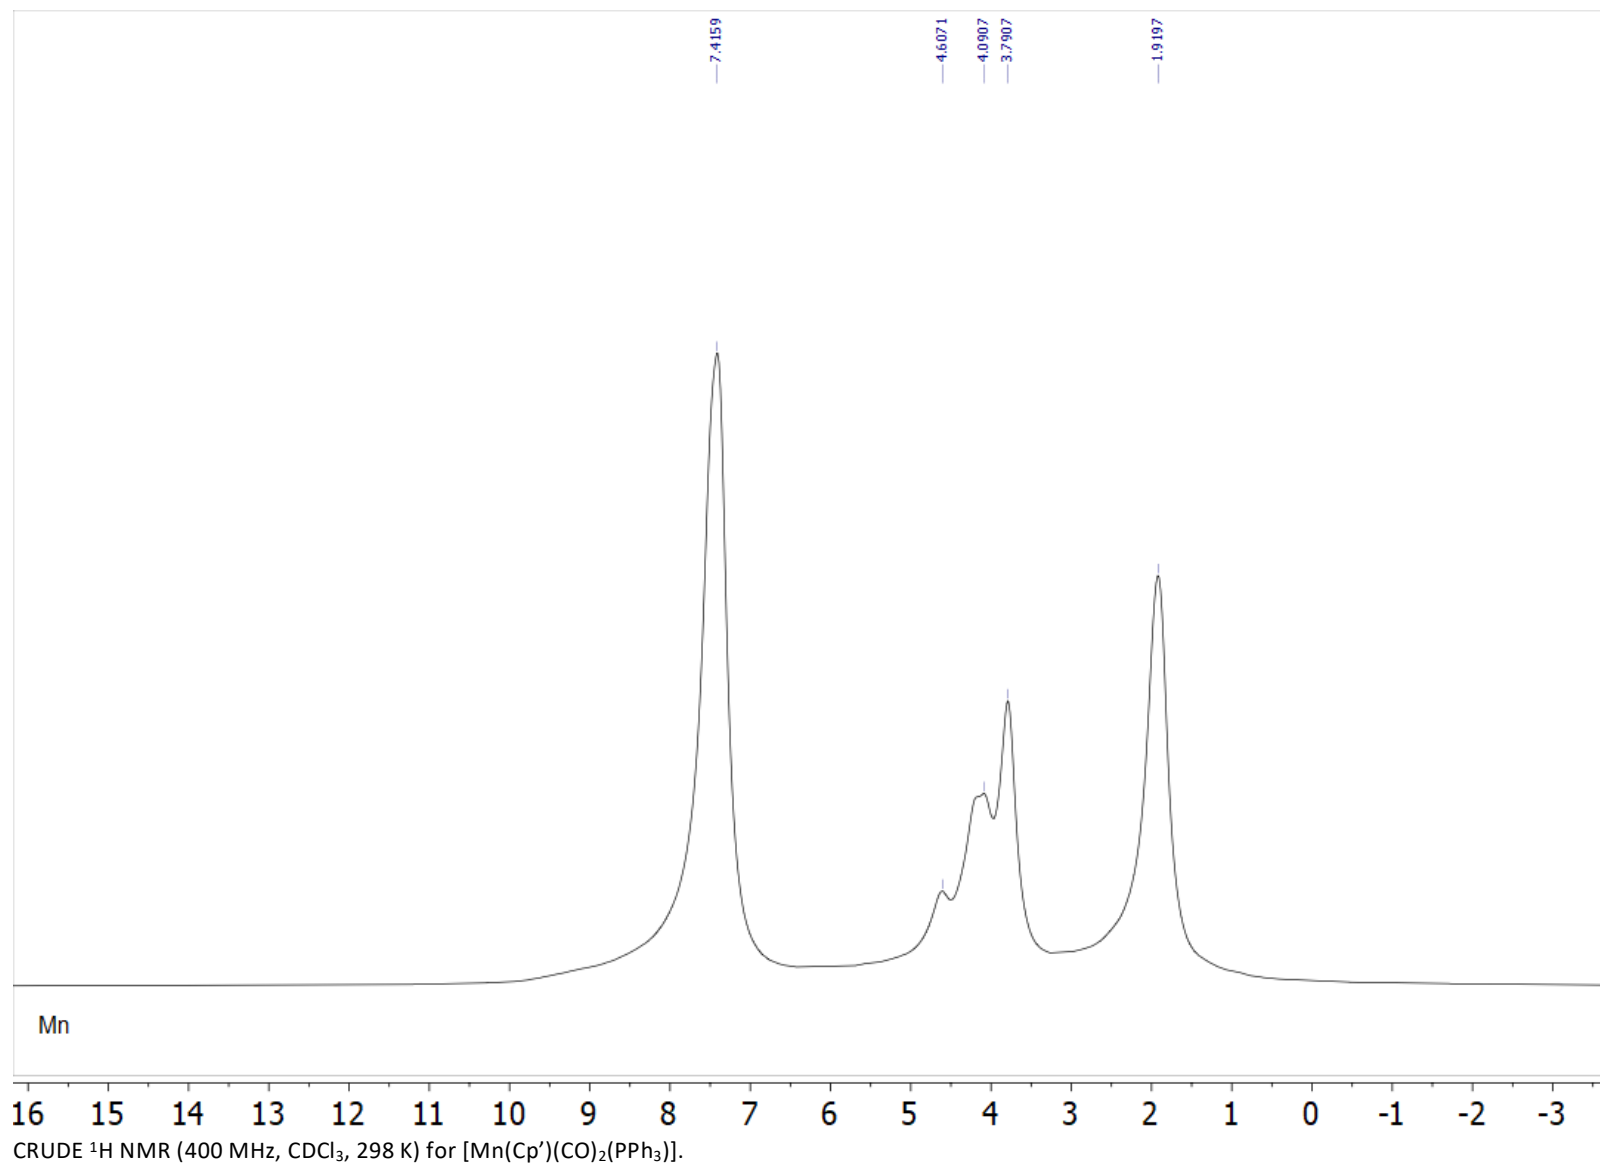

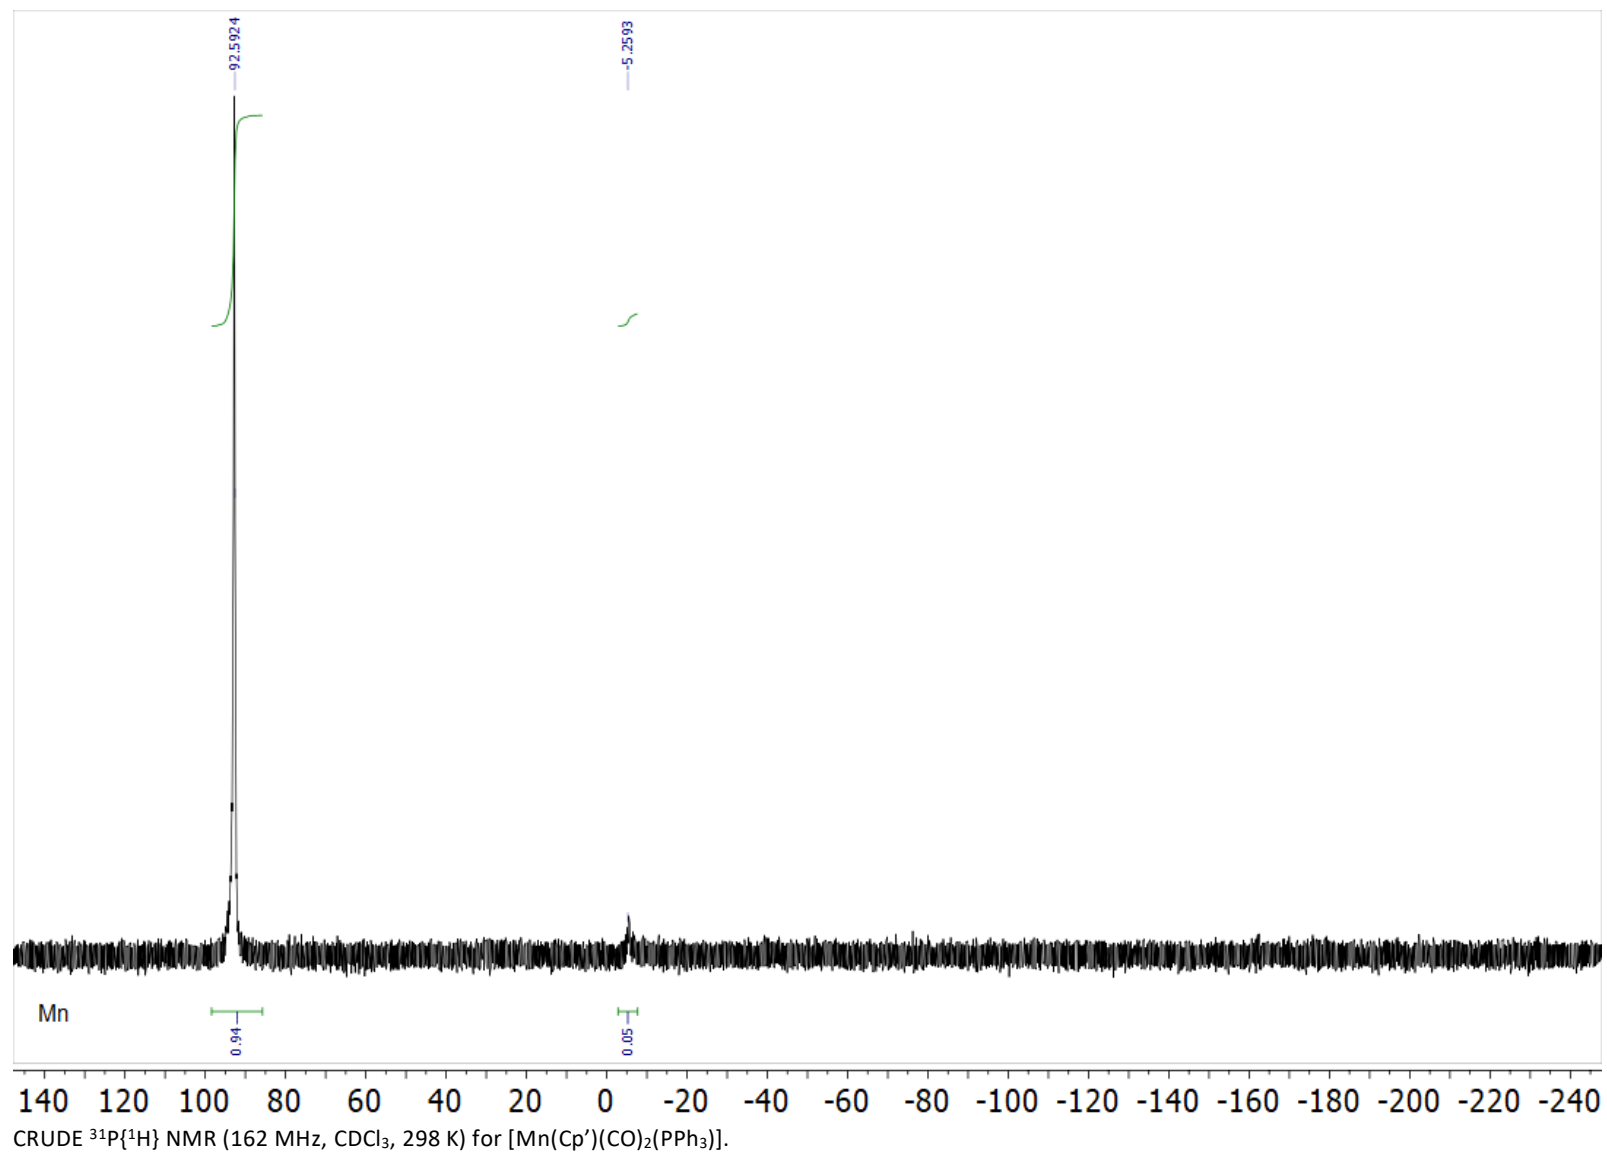

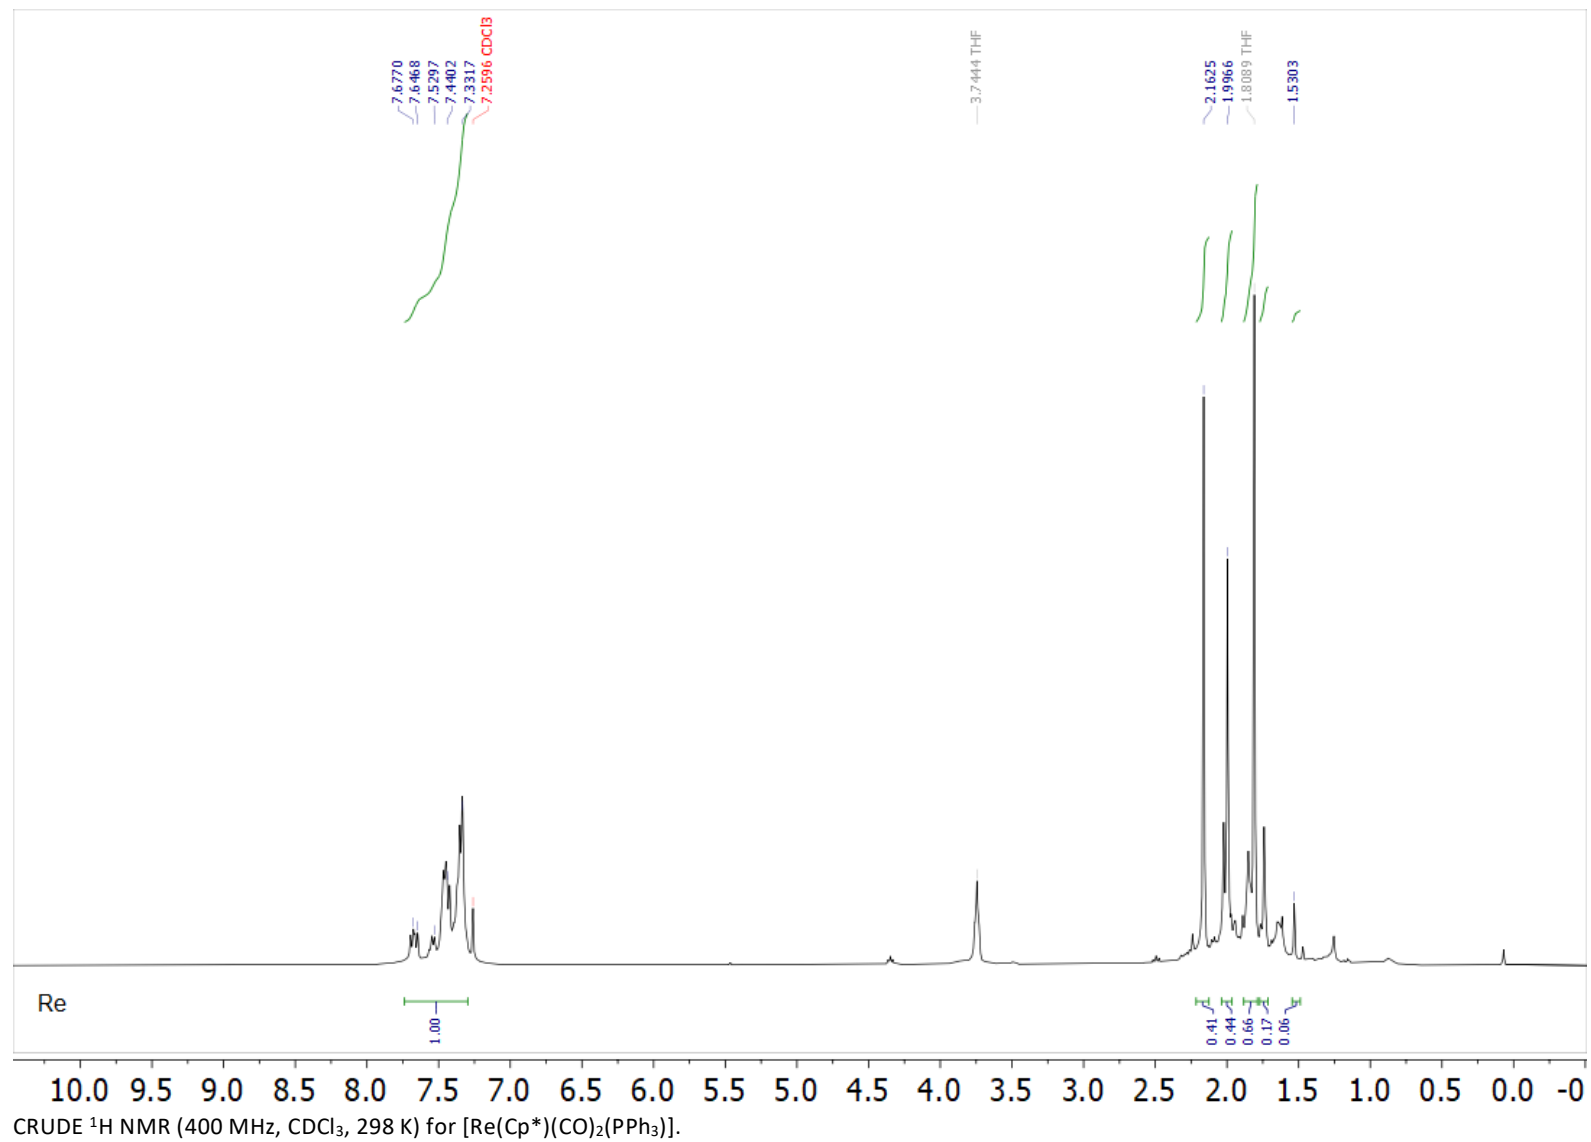

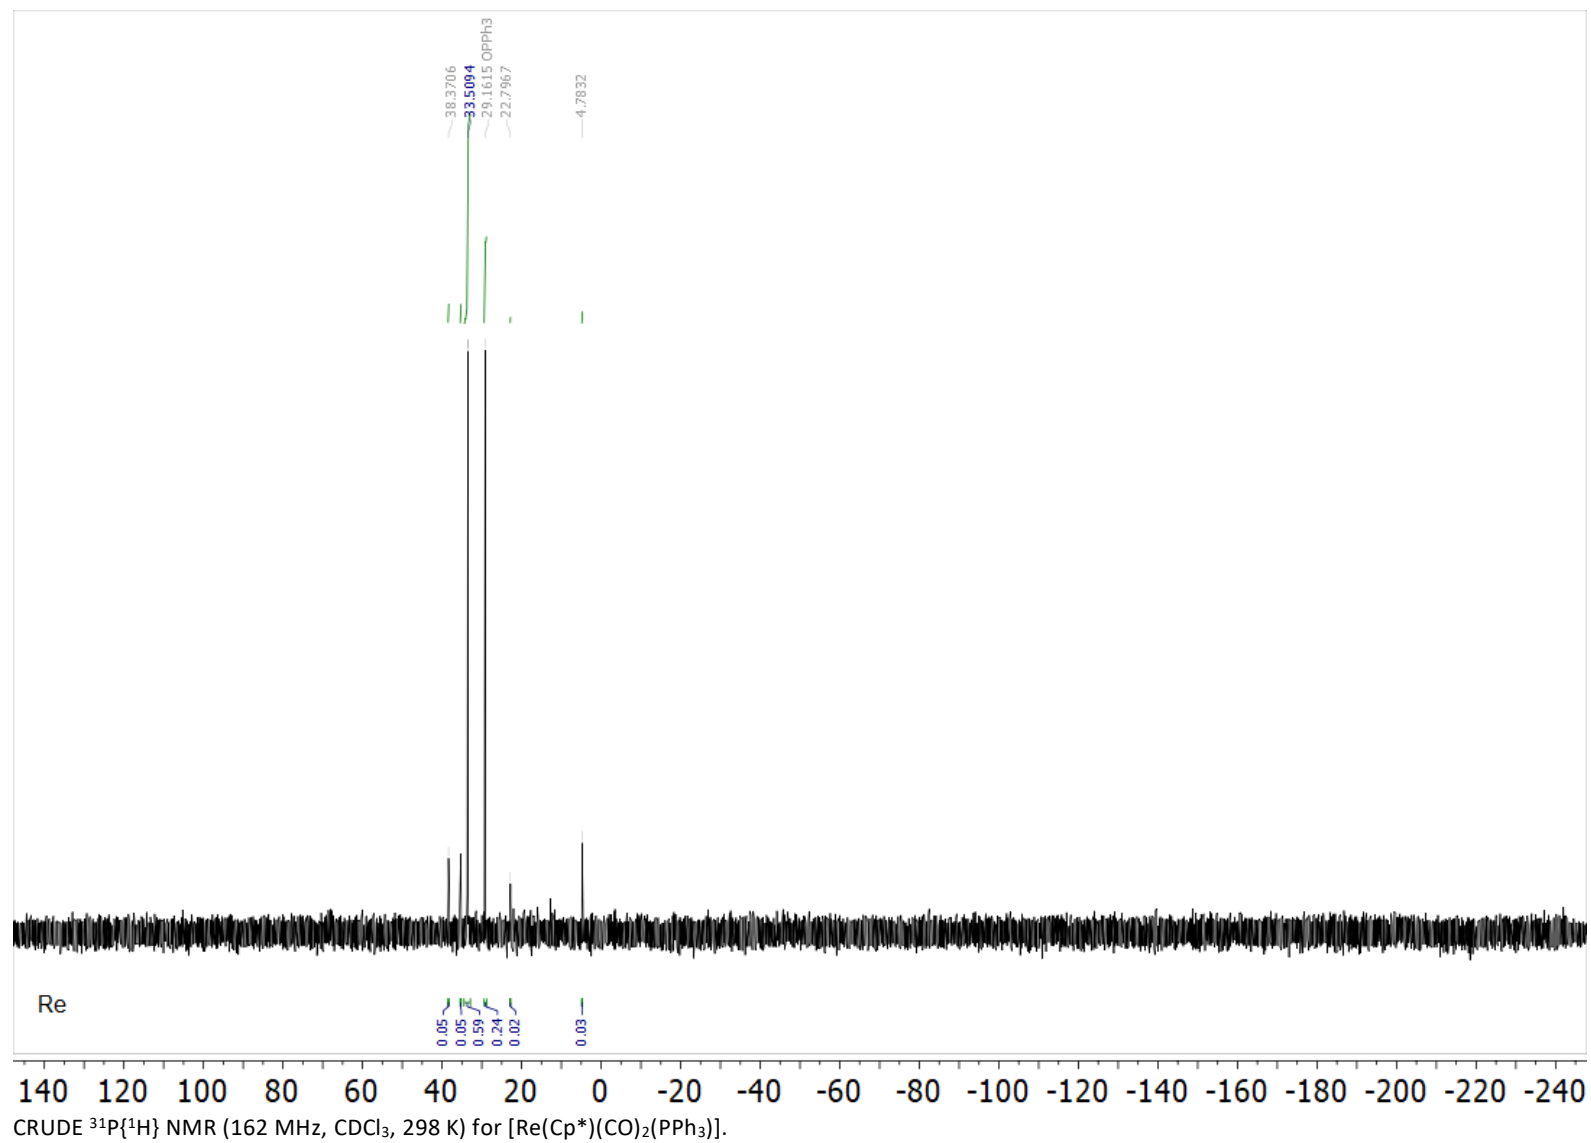

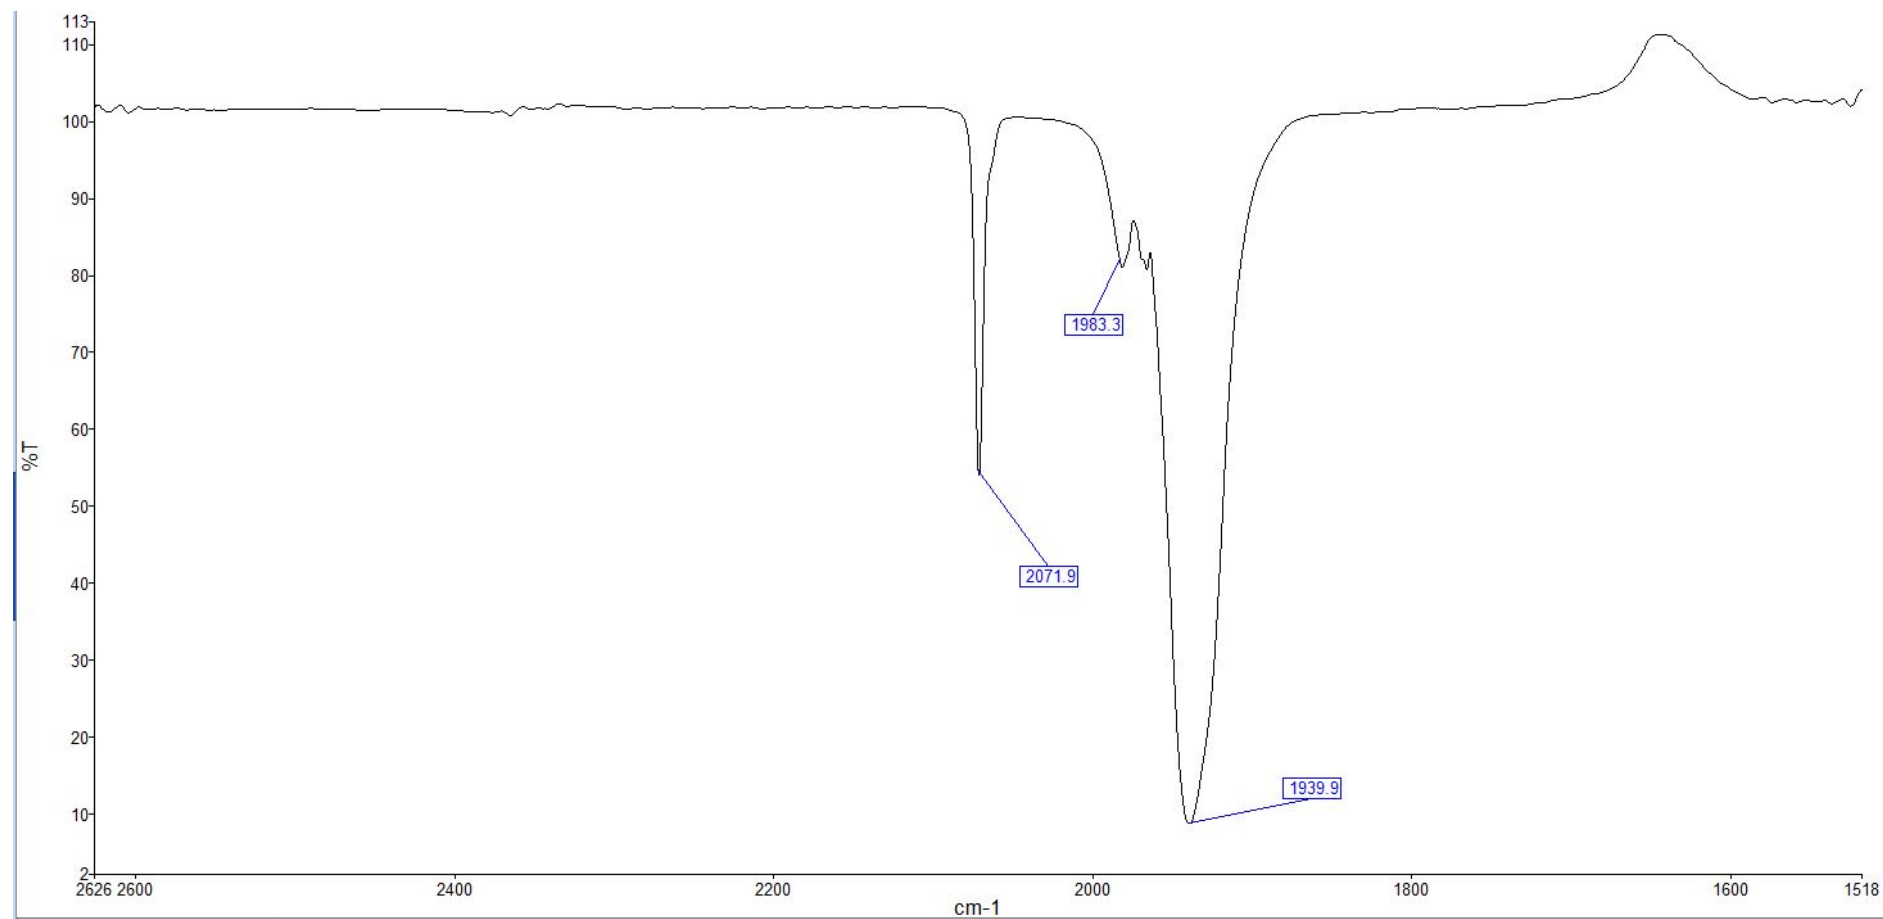IR (THF) for  $[\text{W}(\text{CO})_5(\text{PPh}_3)]$ .



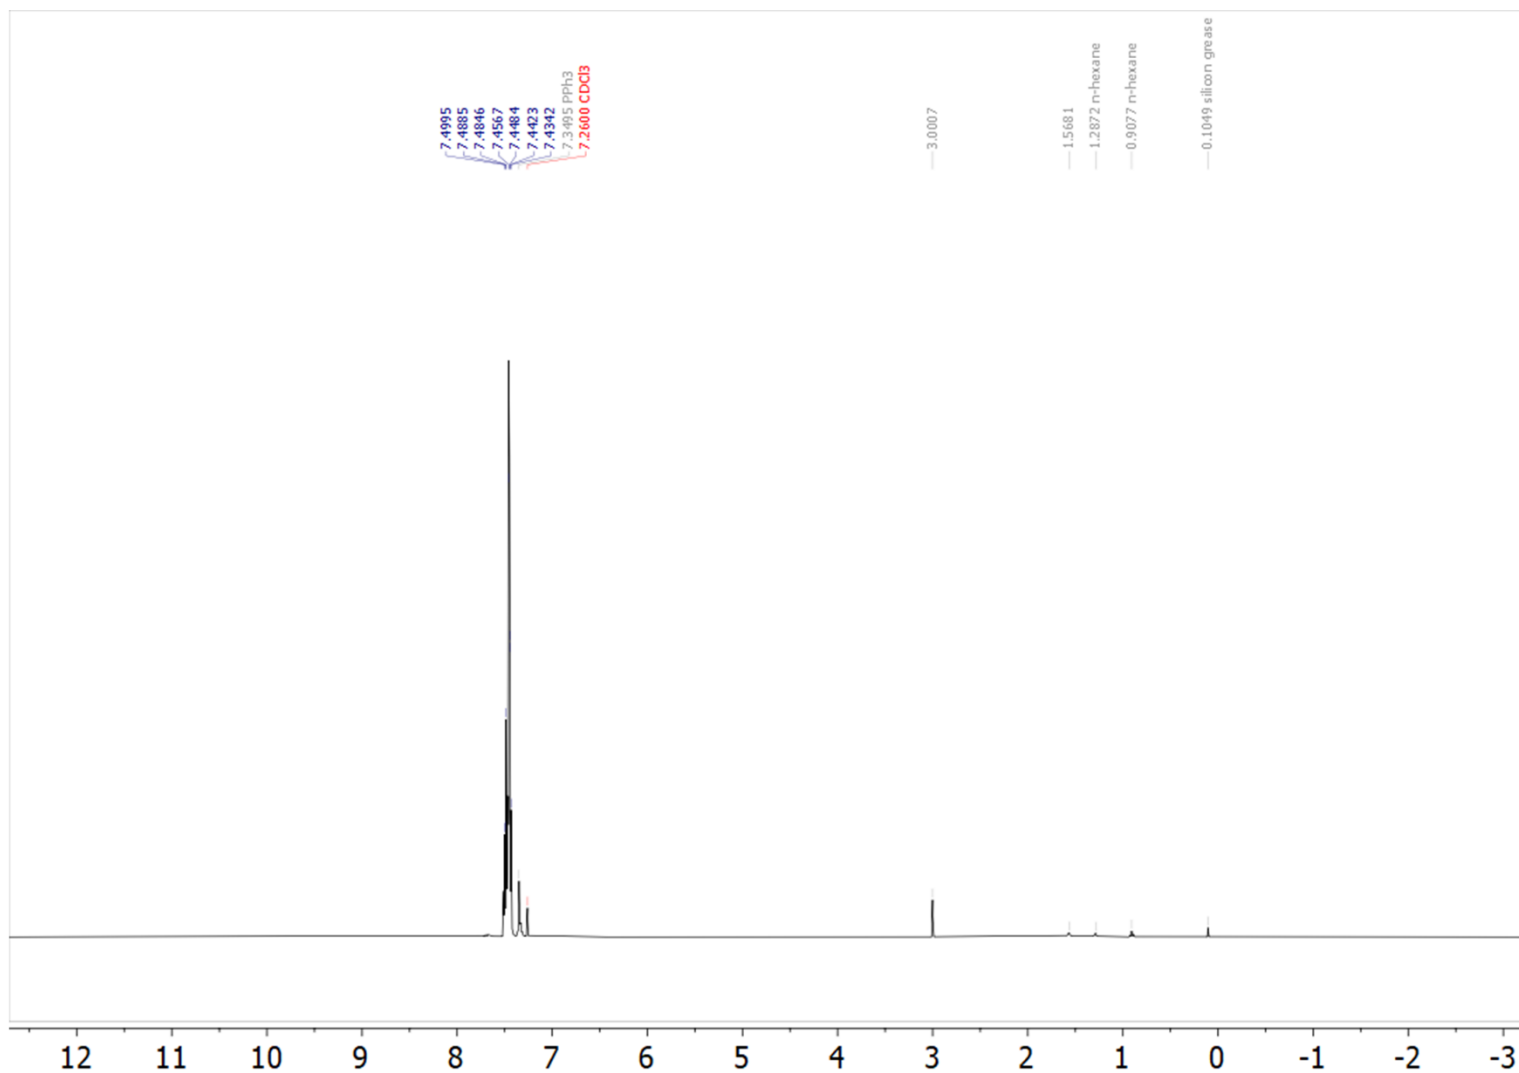

<sup>1</sup>H NMR (400 MHz, CDCl<sub>3</sub>, 298 K) for [W(CO)<sub>5</sub>(PPh<sub>3</sub>)].

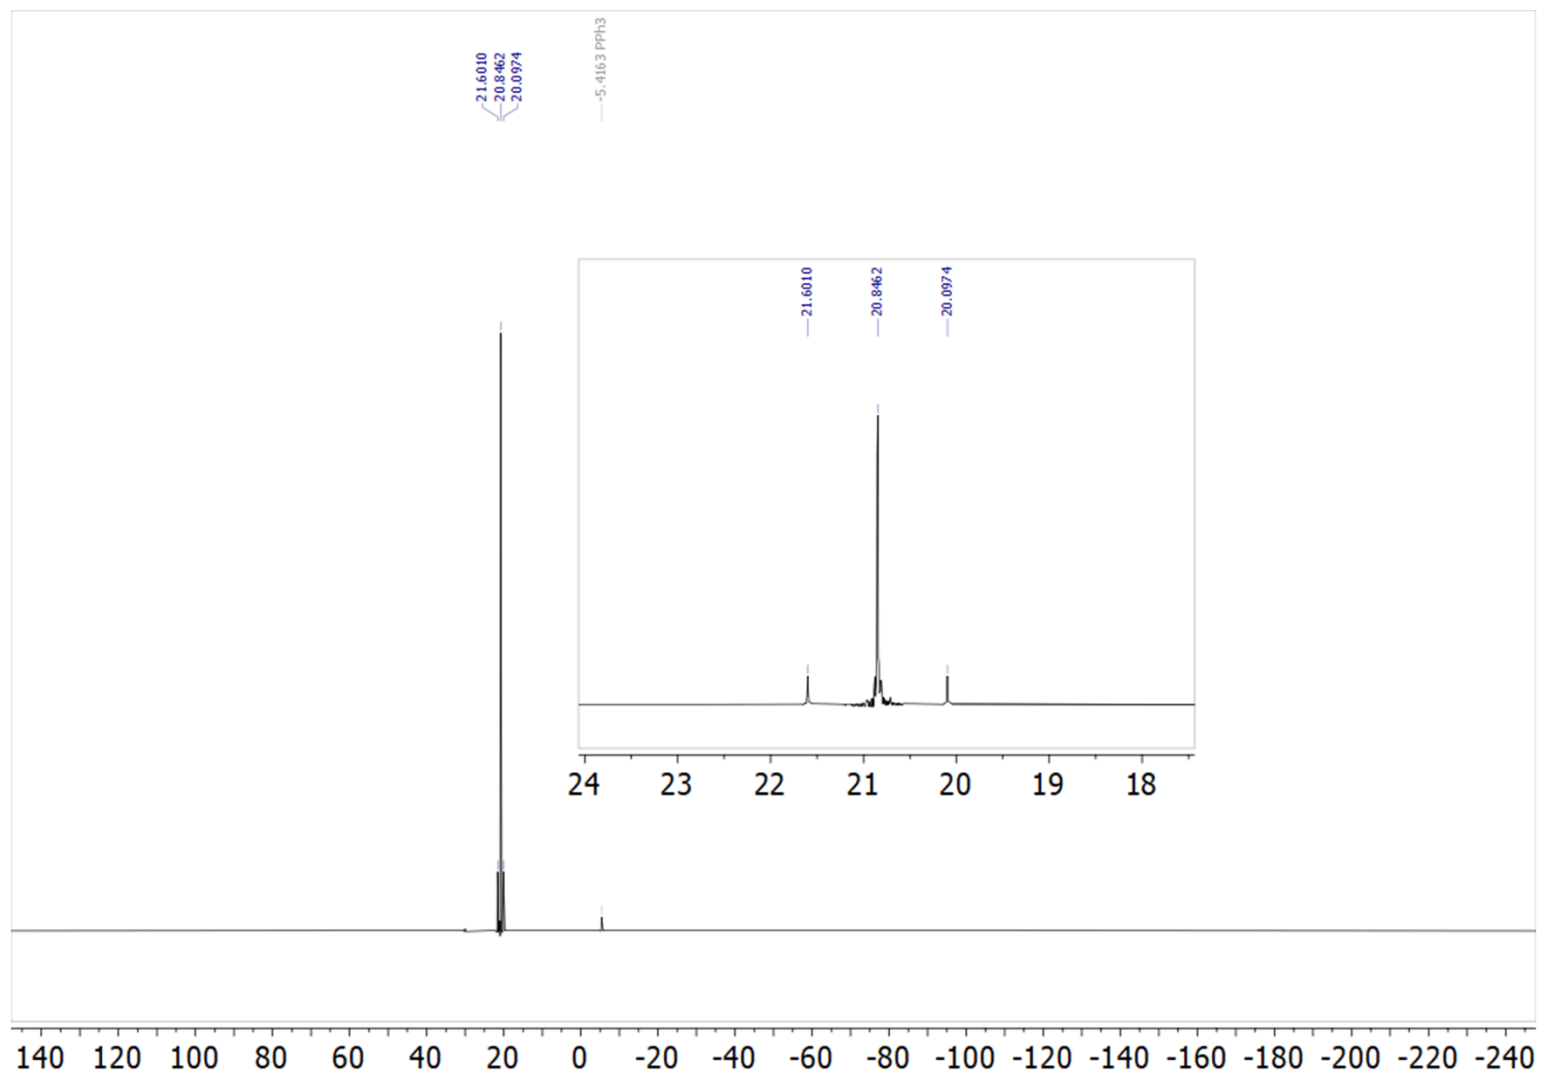

$^{31}\text{P}\{^1\text{H}\}$  NMR (162 MHz,  $\text{CDCl}_3$ , 298 K) for  $[\text{W}(\text{CO})_5(\text{PPh}_3)]$ .

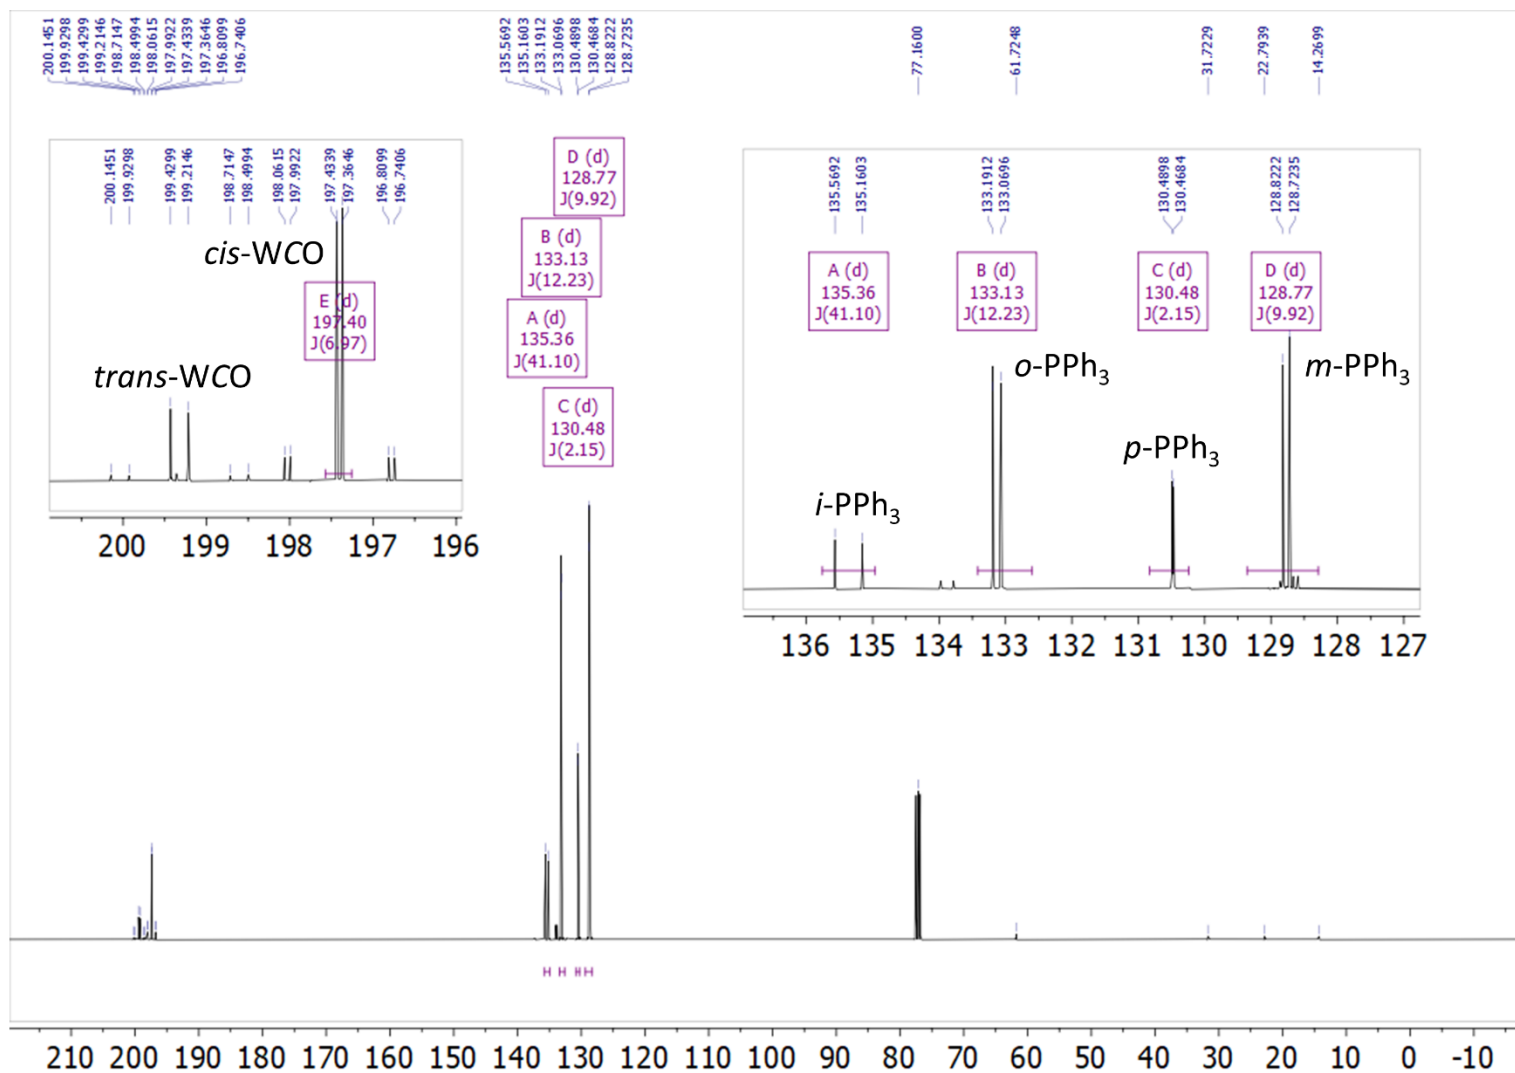

$^{13}\text{C}\{^1\text{H}\}$  NMR (150 MHz,  $\text{CDCl}_3$ , 298 K) for  $[\text{W}(\text{CO})_5(\text{PPh}_3)]$ .

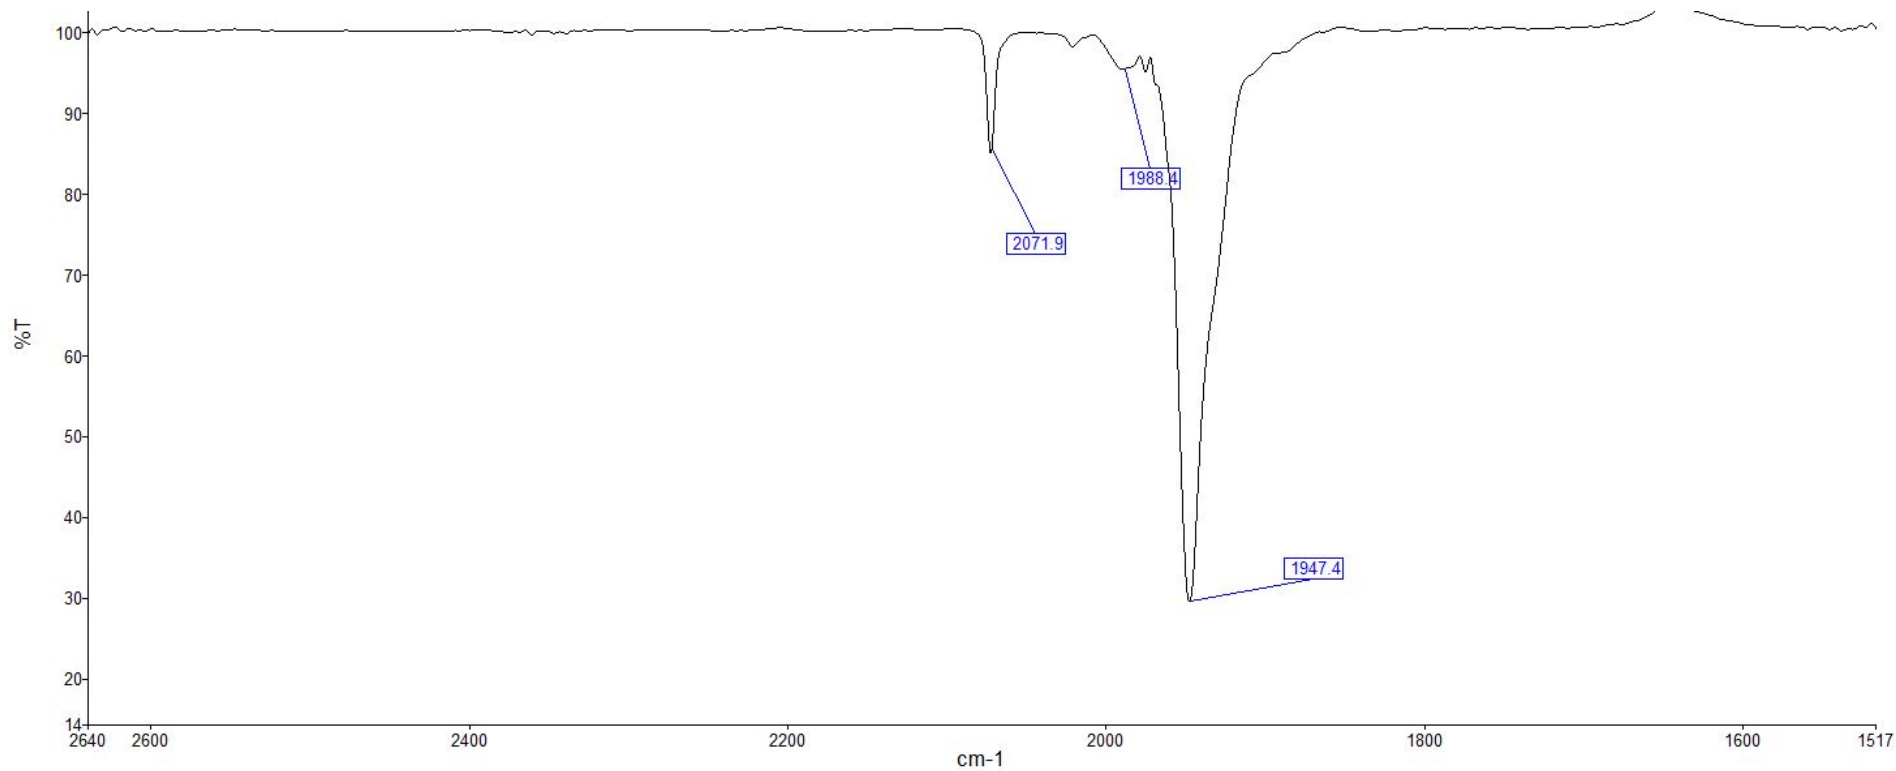

IR (THF) for [Mo(CO)<sub>5</sub>(PPh<sub>3</sub>)].

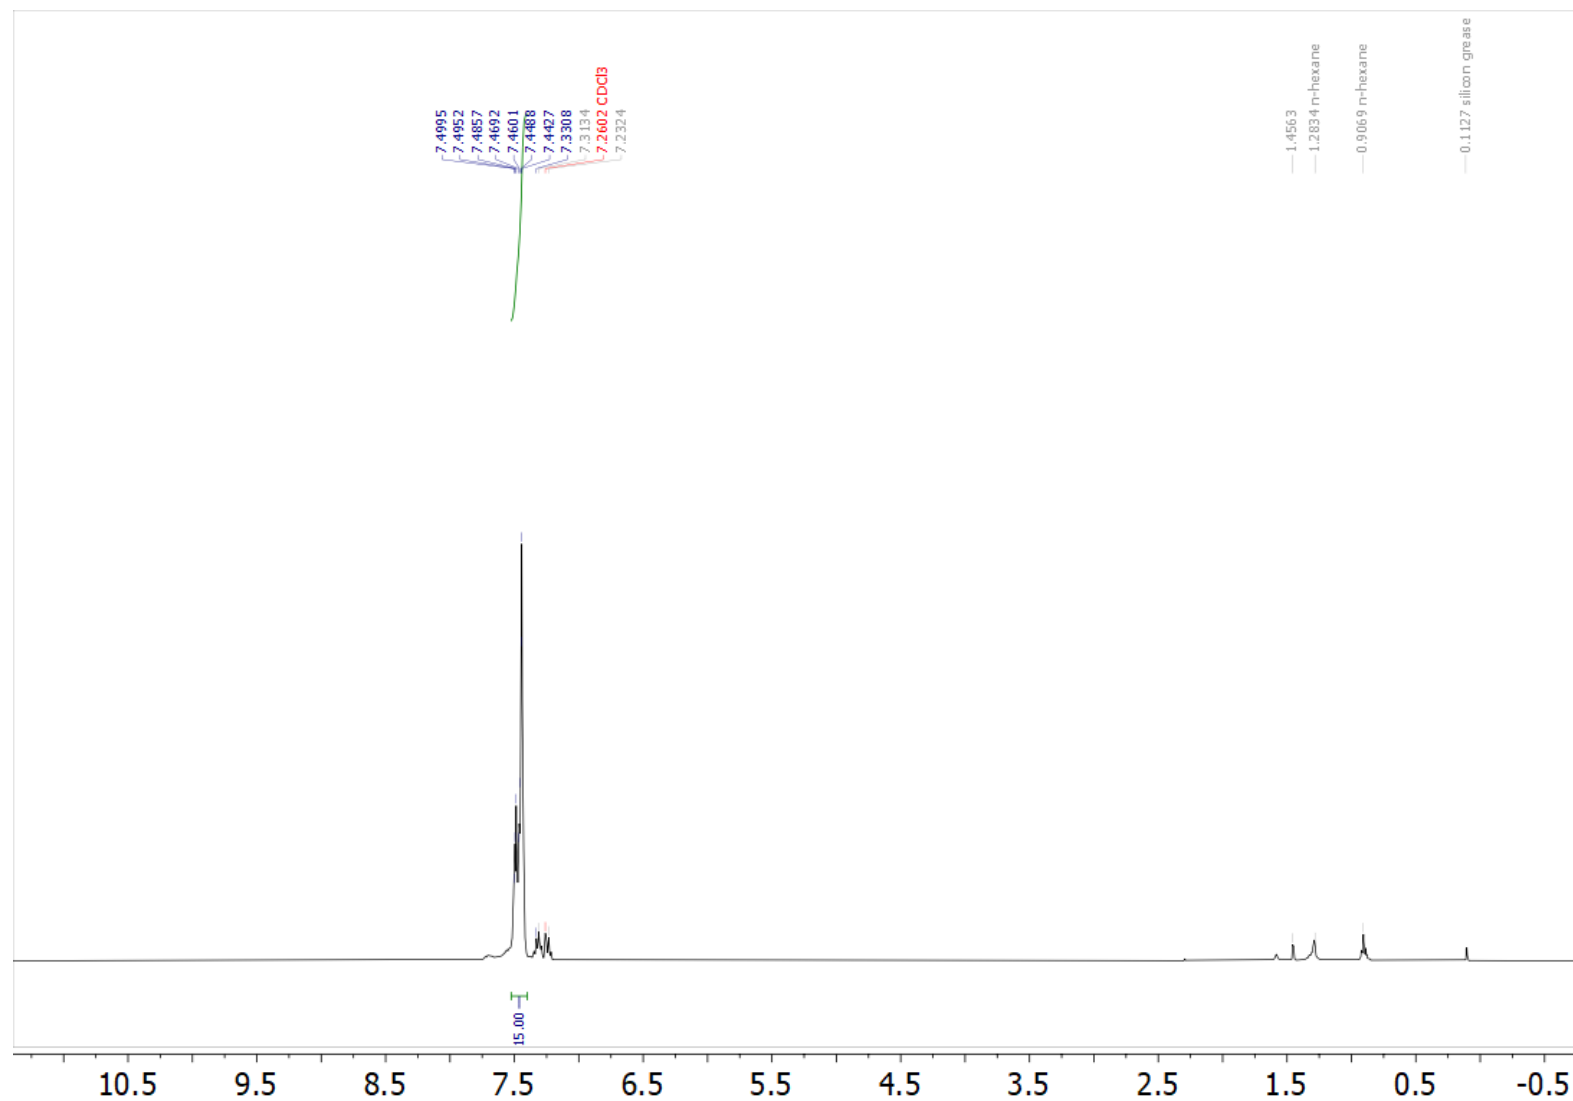

<sup>1</sup>H NMR (400 MHz, CDCl<sub>3</sub>, 298 K) for [Mo(CO)<sub>5</sub>(PPh<sub>3</sub>)].

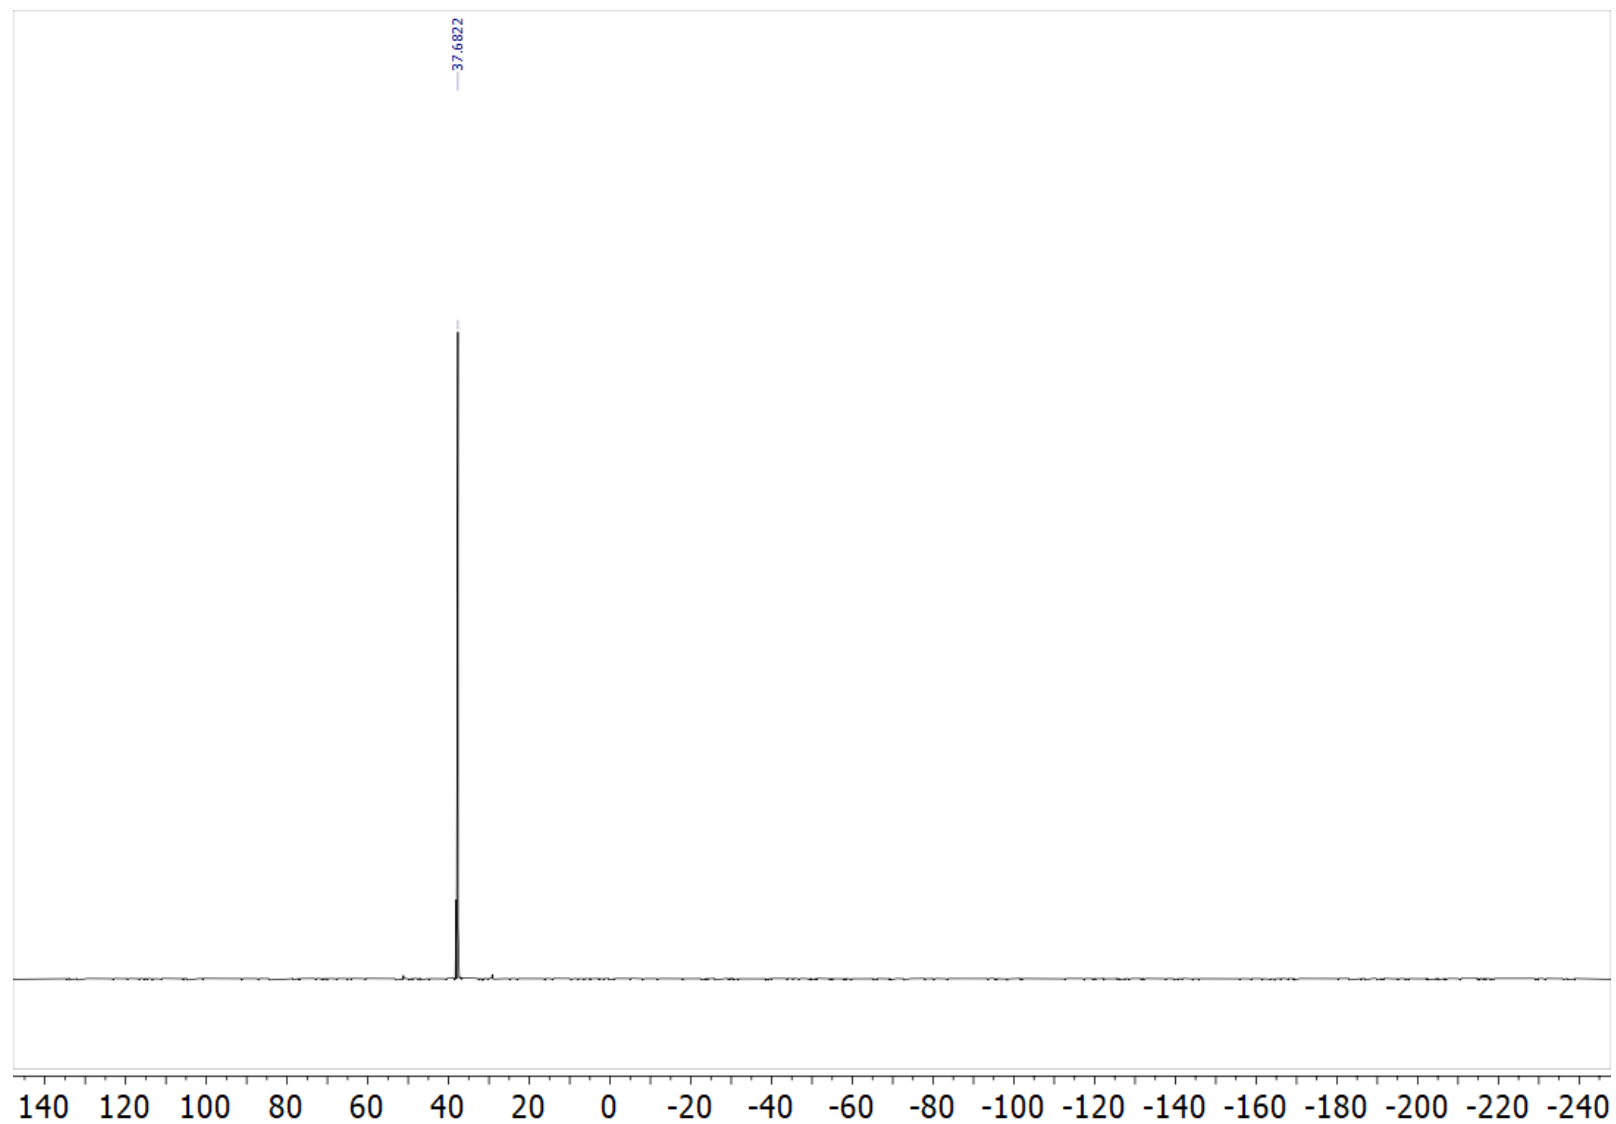

$^{31}\text{P}\{^1\text{H}\}$  NMR (162 MHz,  $\text{CDCl}_3$ , 298 K) for  $[\text{Mo}(\text{CO})_5(\text{PPh}_3)]$ .

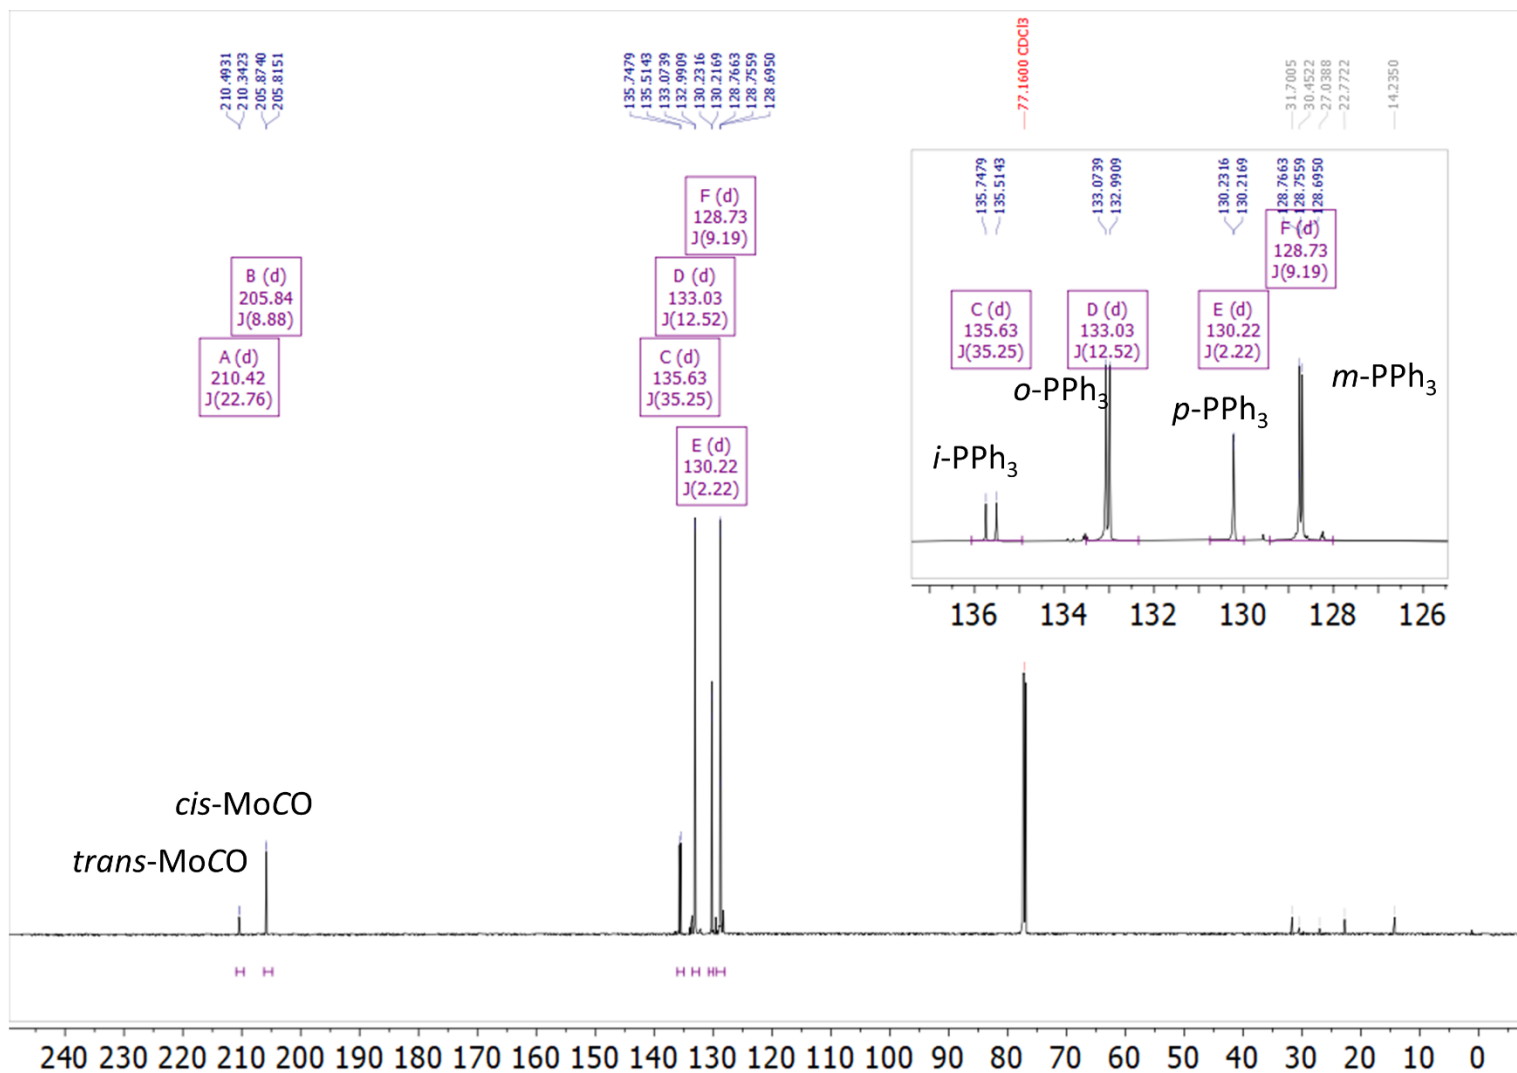

<sup>13</sup>C{<sup>1</sup>H} NMR (150 MHz, CDCl<sub>3</sub>, 298 K) for [Mo(CO)<sub>5</sub>(PPh<sub>3</sub>)].

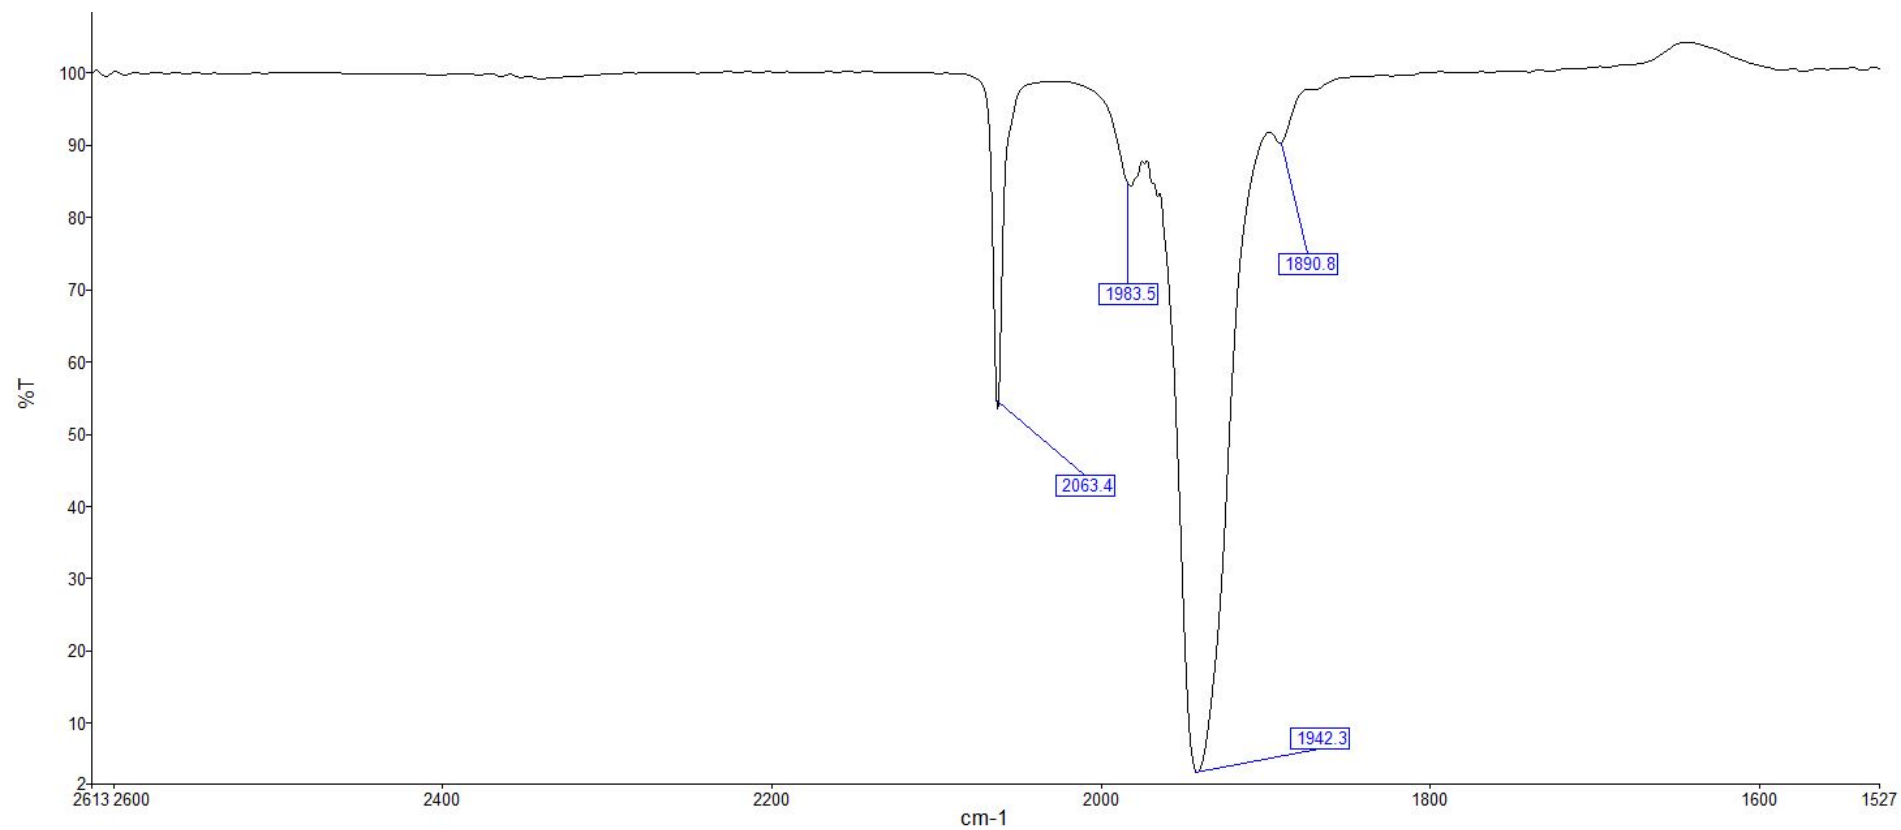

IR (THF) for [Cr(CO)<sub>5</sub>(PPh<sub>3</sub>)].



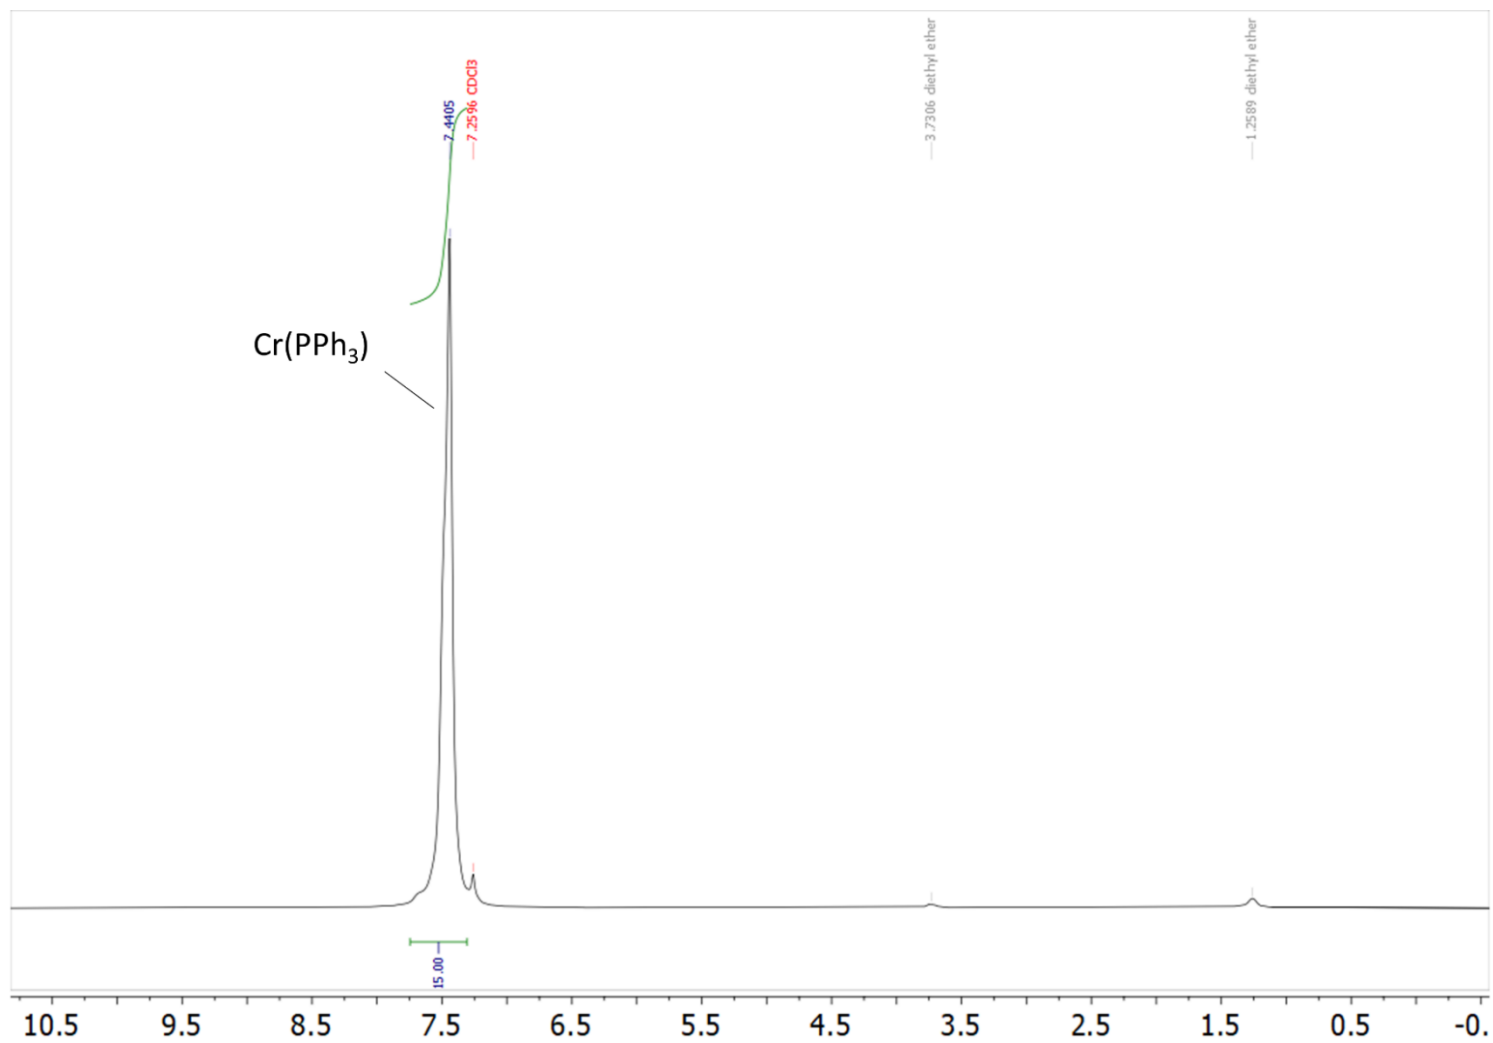

$^1\text{H}$  NMR (400 MHz,  $\text{CDCl}_3$ , 298 K) for  $[\text{Cr}(\text{CO})_5(\text{PPh}_3)]$ .

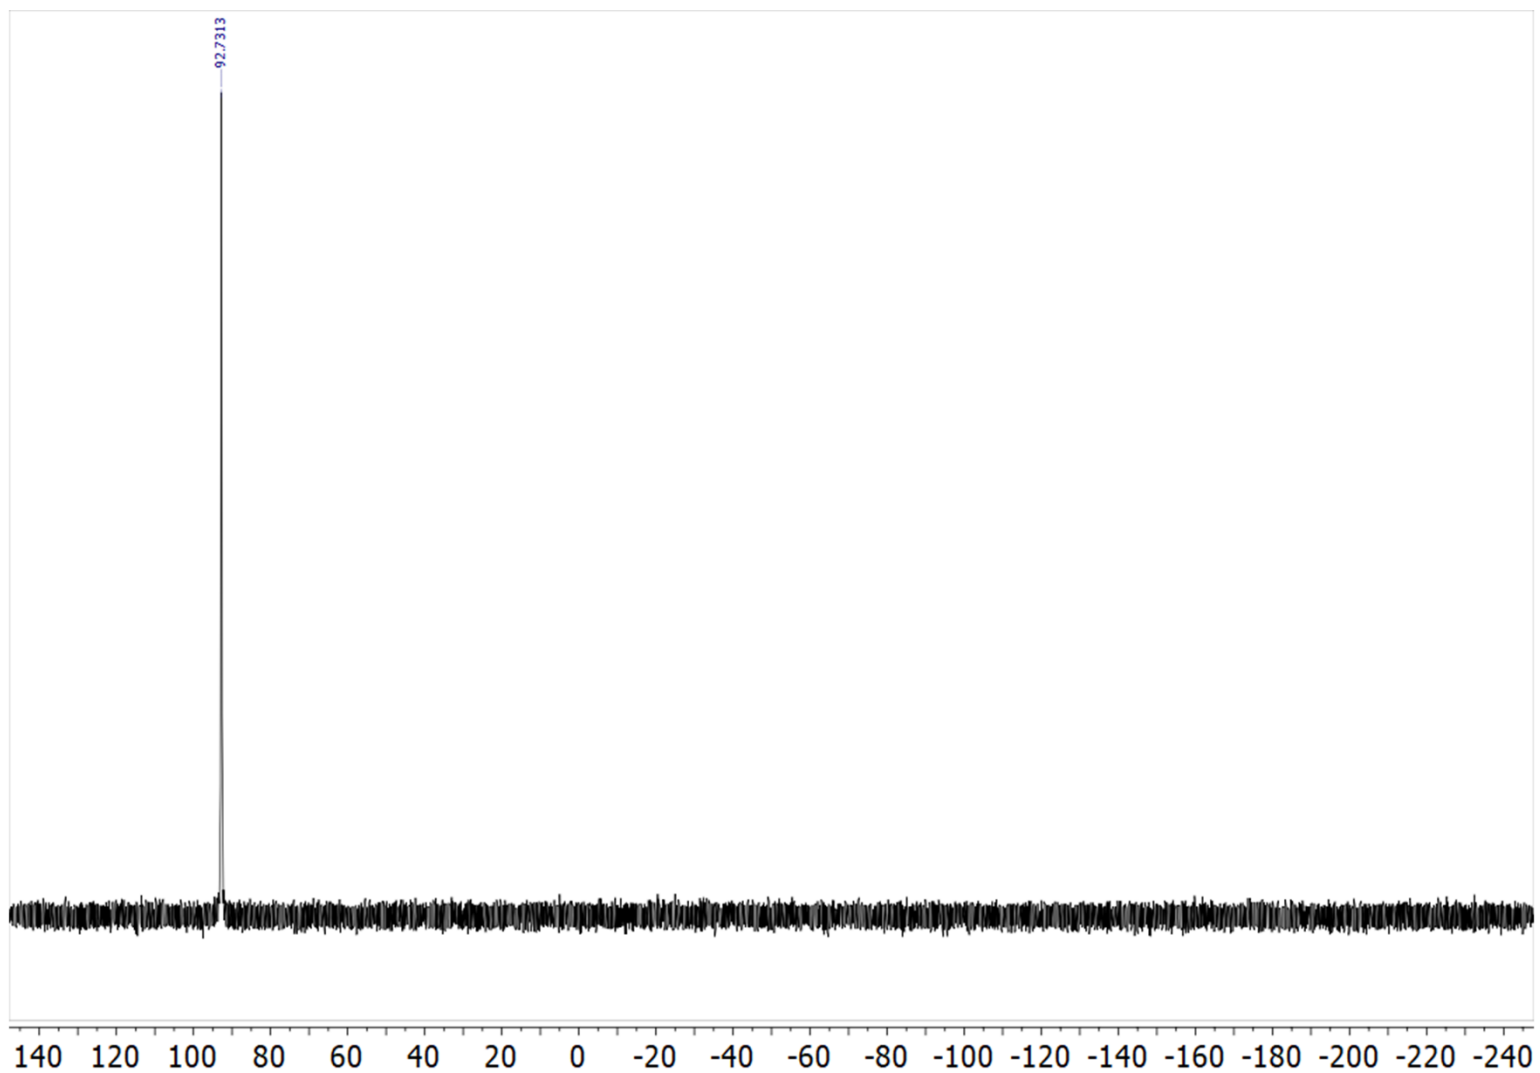

$^{31}\text{P}\{^1\text{H}\}$  NMR (162 MHz,  $\text{CDCl}_3$ , 298 K) for  $[\text{Cr}(\text{CO})_5(\text{PPh}_3)]$ .

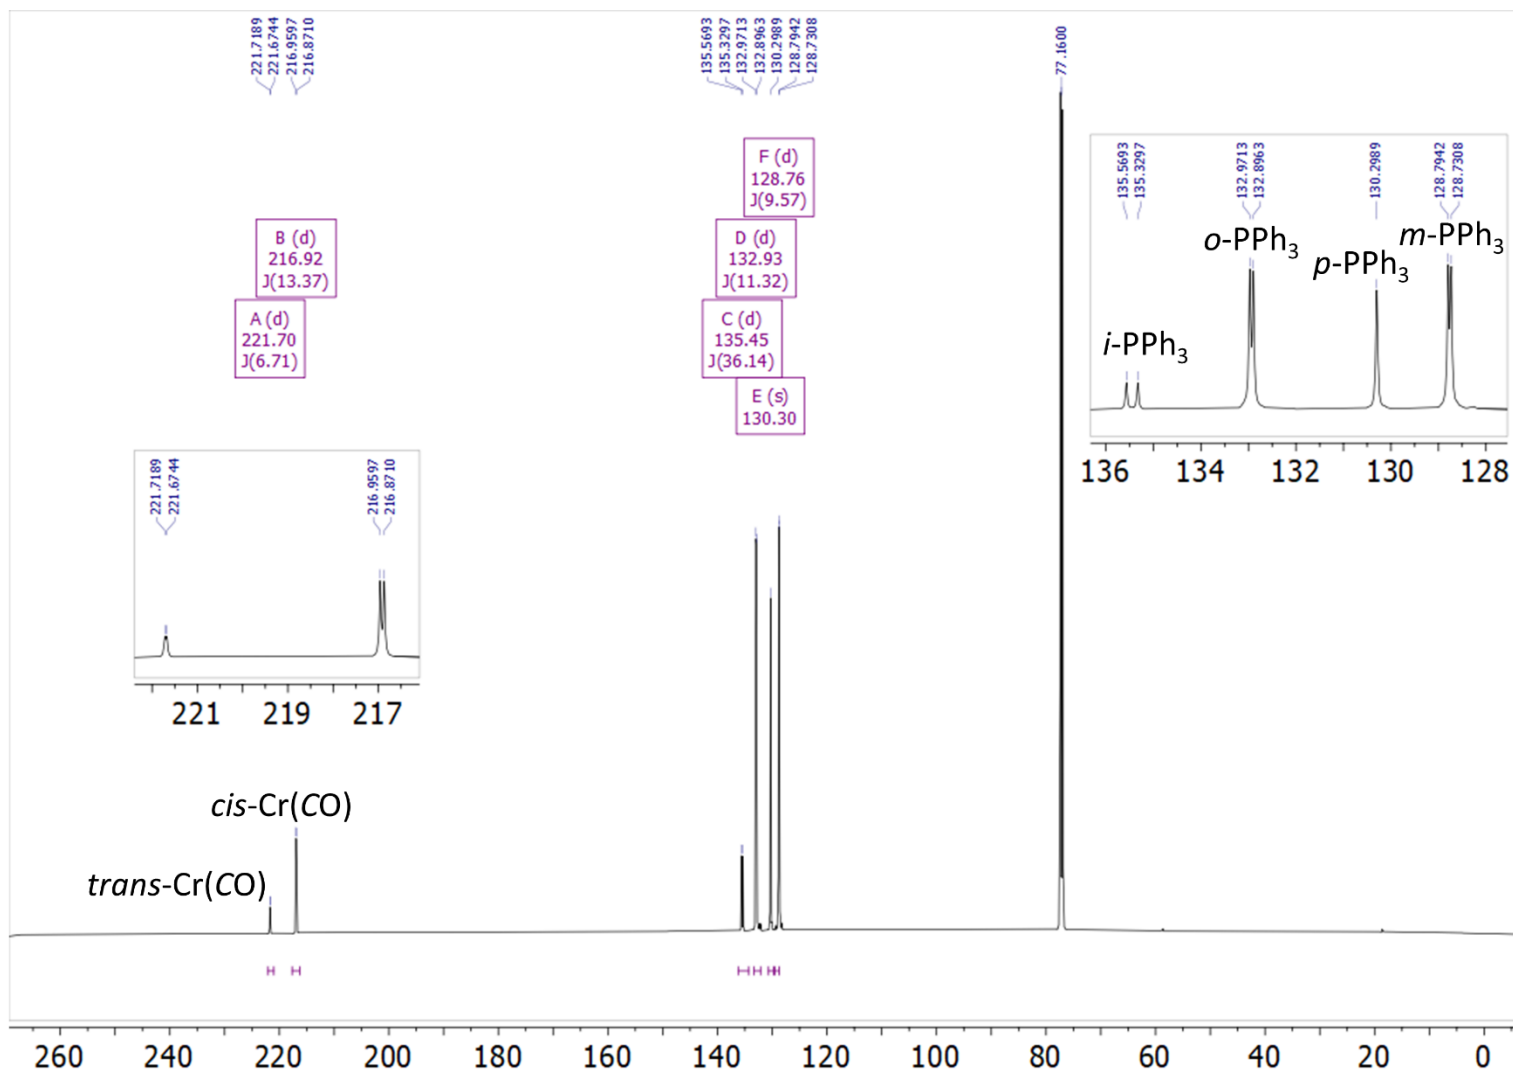

$^{13}\text{C}\{^1\text{H}\}$  NMR (150 MHz,  $\text{CDCl}_3$ , 298 K) for  $[\text{Cr}(\text{CO})_5(\text{PPh}_3)]$ .

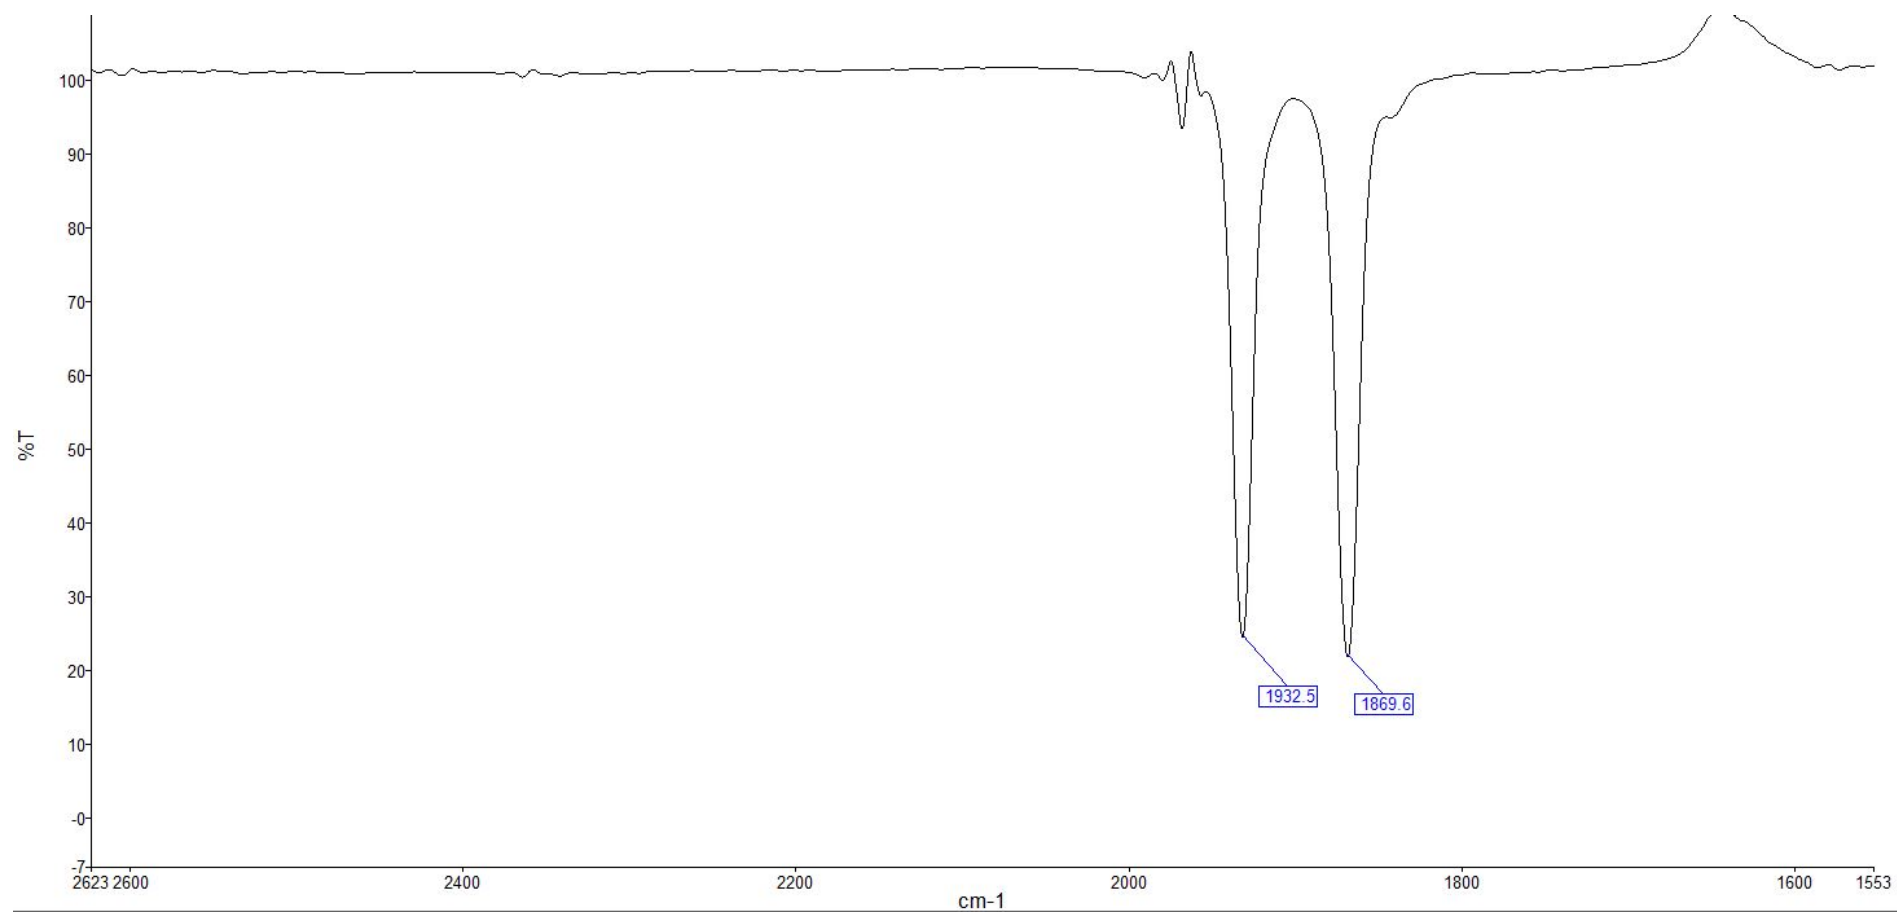

IR (THF) for [Mn(Cp')(CO)<sub>2</sub>(PPh<sub>3</sub>)].

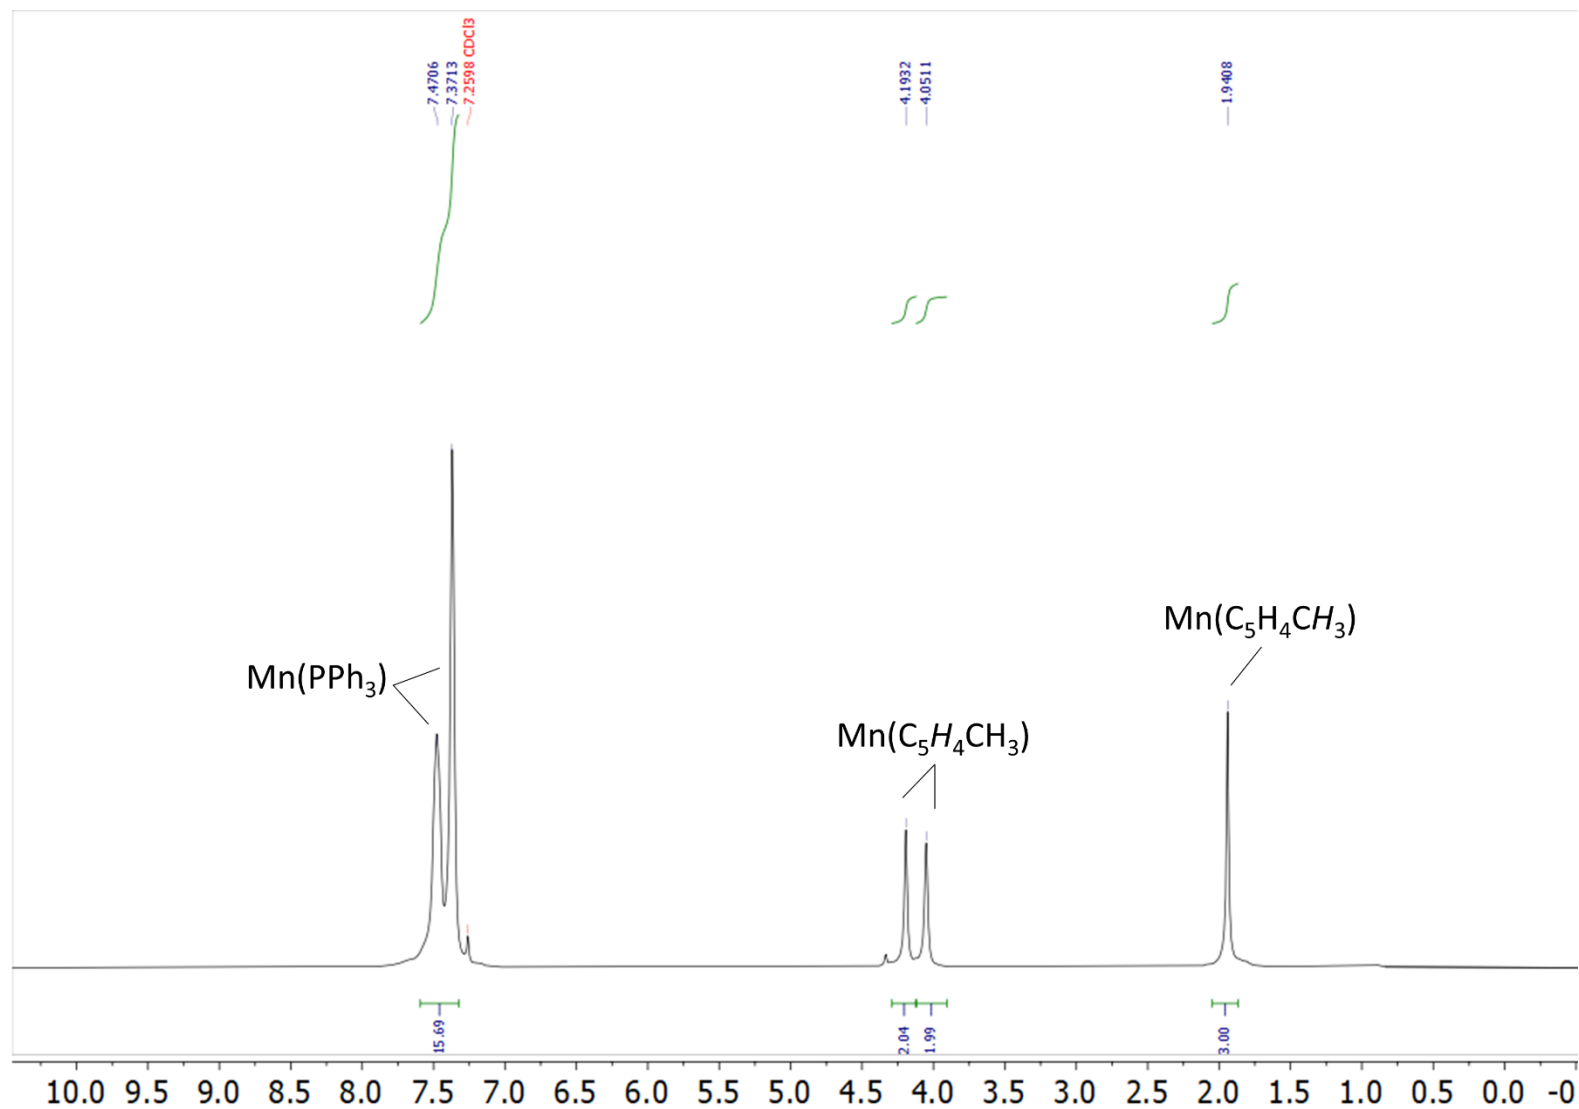

$^1\text{H}$  NMR (400 MHz,  $\text{CDCl}_3$ , 298 K) for  $[\text{Mn}(\text{Cp}^*)(\text{CO})_2(\text{PPh}_3)]$ .

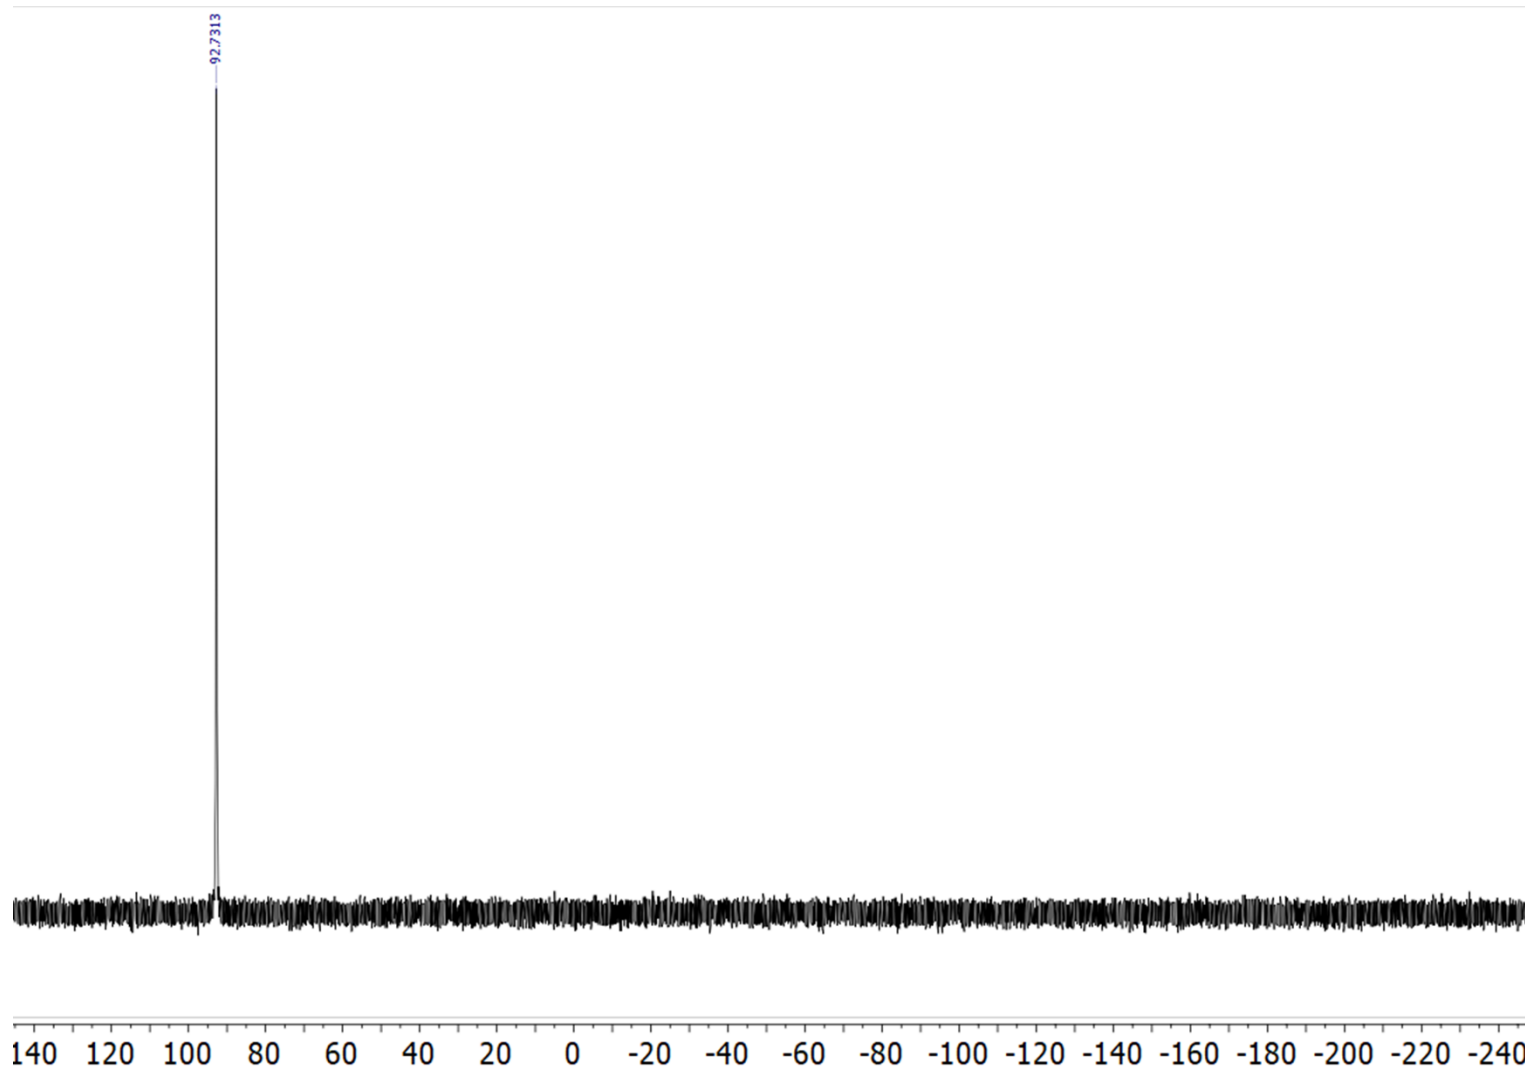

$^{31}\text{P}\{^1\text{H}\}$  NMR (162 MHz,  $\text{CDCl}_3$ , 298 K) for  $[\text{Mn}(\text{Cp}')(\text{CO})_2(\text{PPh}_3)]$ .

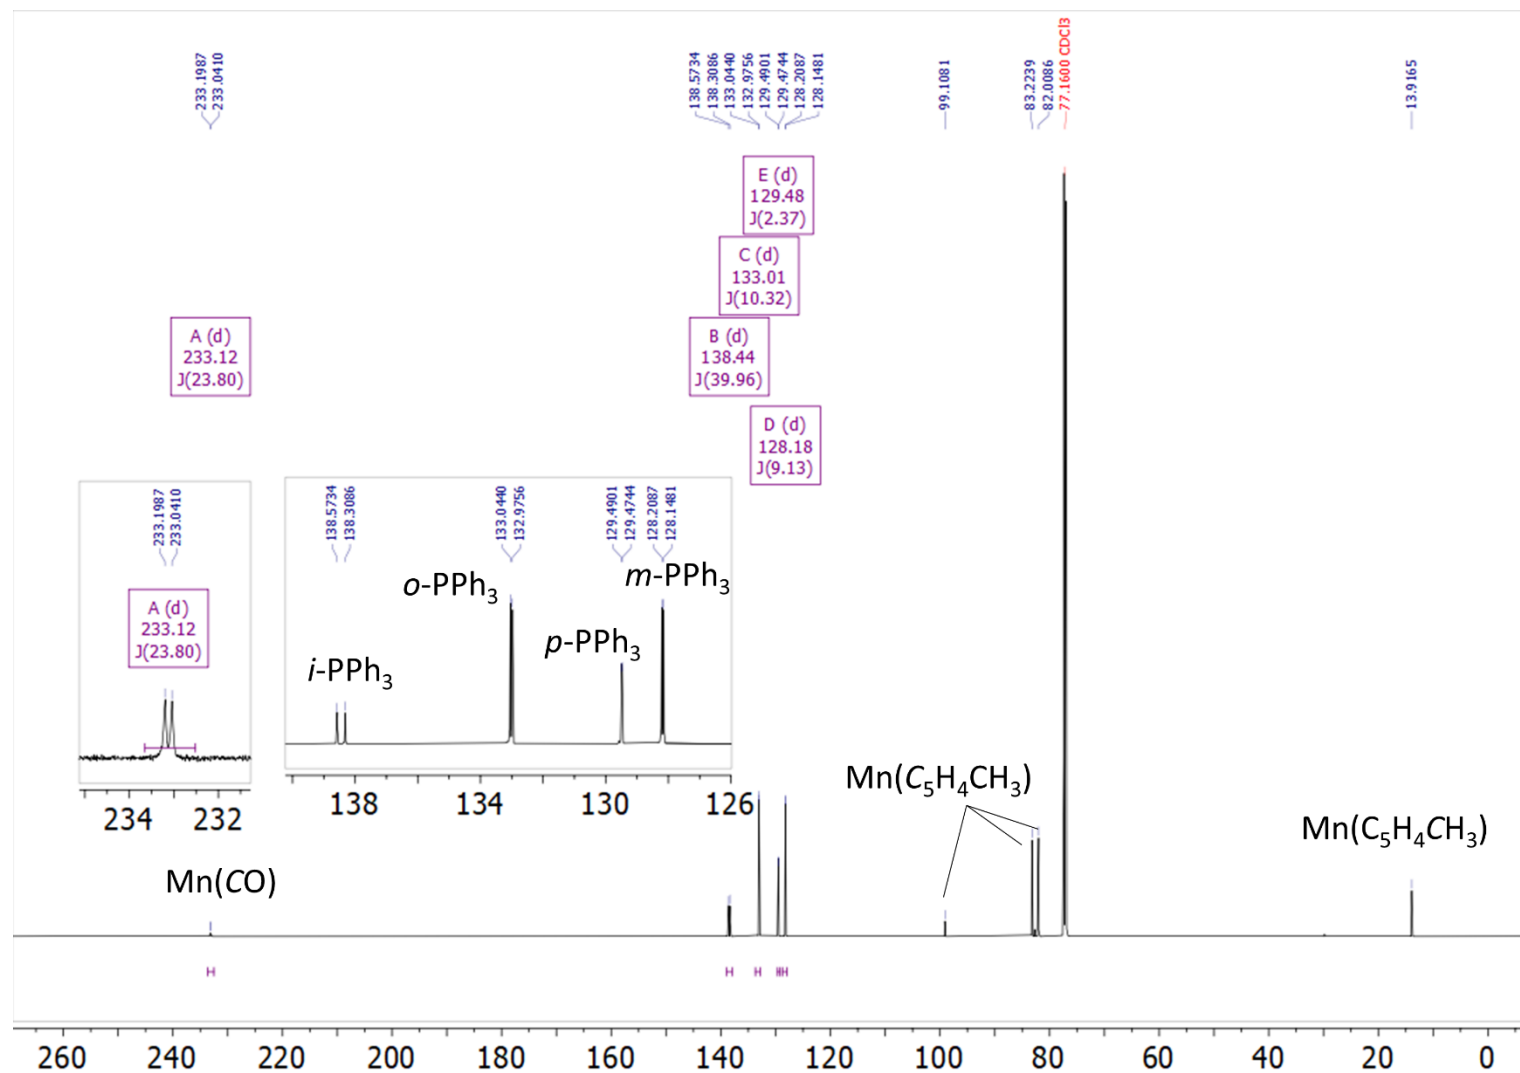

$^{13}\text{C}\{^1\text{H}\}$  NMR (150 MHz,  $\text{CDCl}_3$ , 298 K) for  $[\text{Mn}(\text{Cp}')(\text{CO})_2(\text{PPh}_3)]$ .

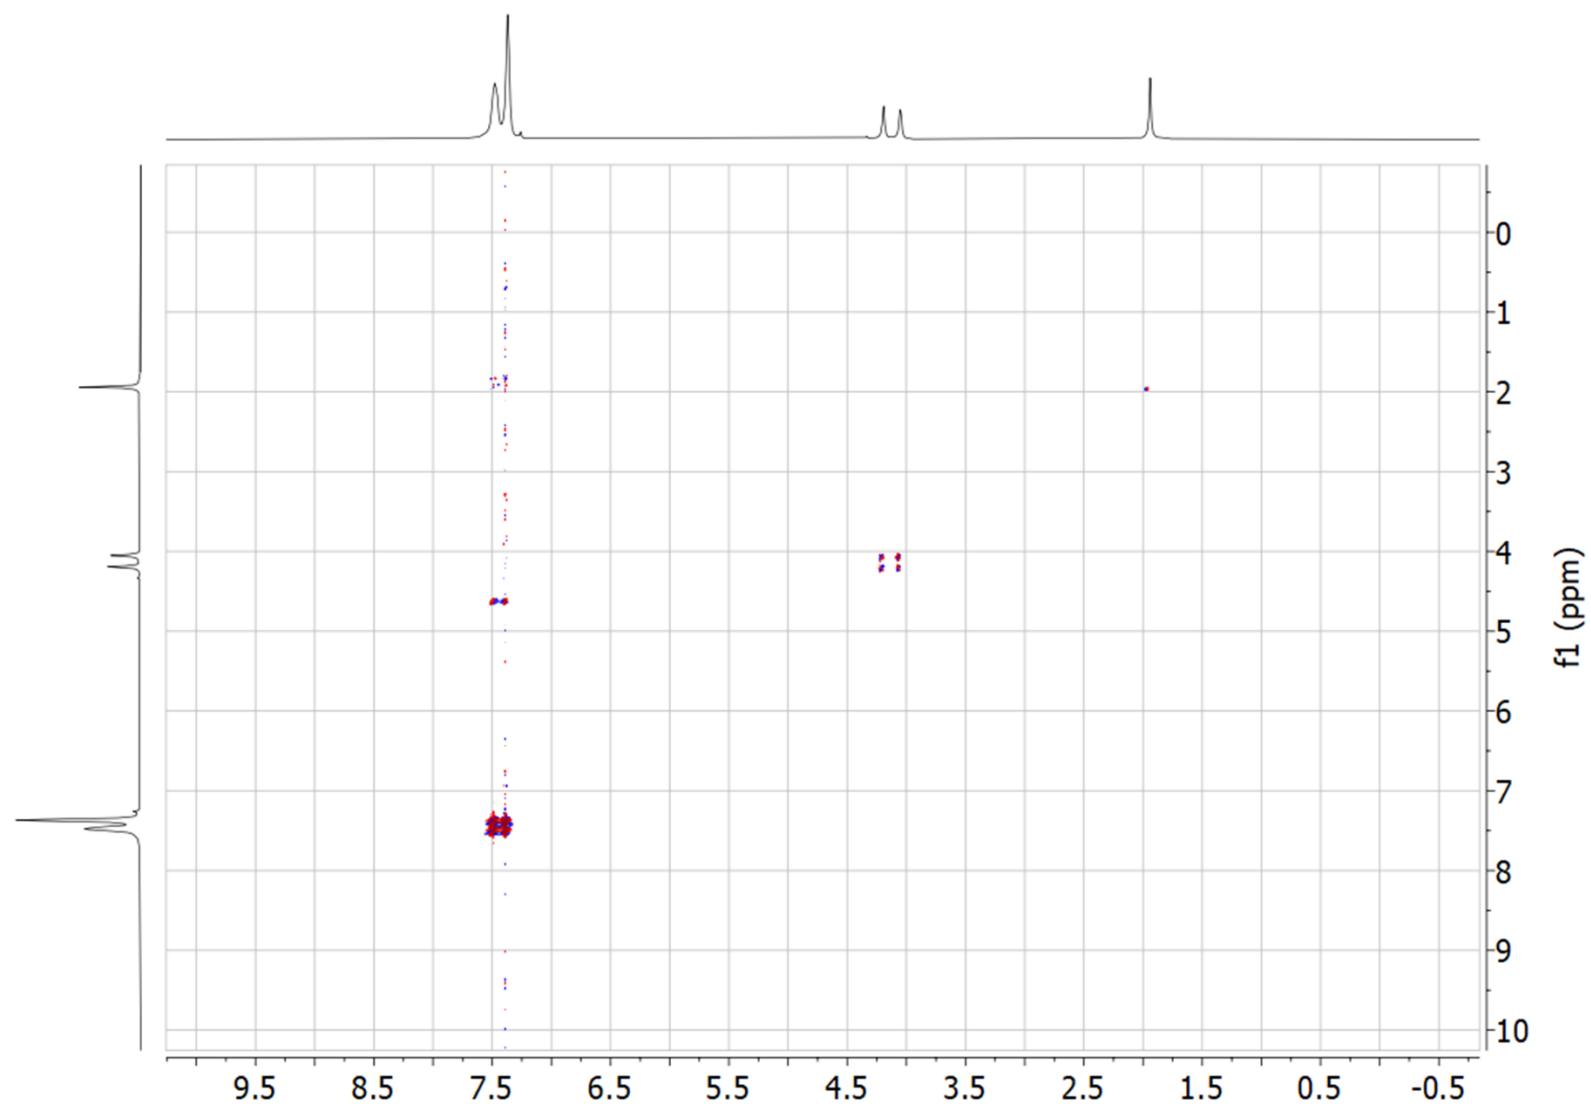

COSY NMR (600 MHz,  $\text{CDCl}_3$ , 298 K) for  $[\text{Mn}(\text{Cp}')(\text{CO})_2(\text{PPh}_3)]$ .



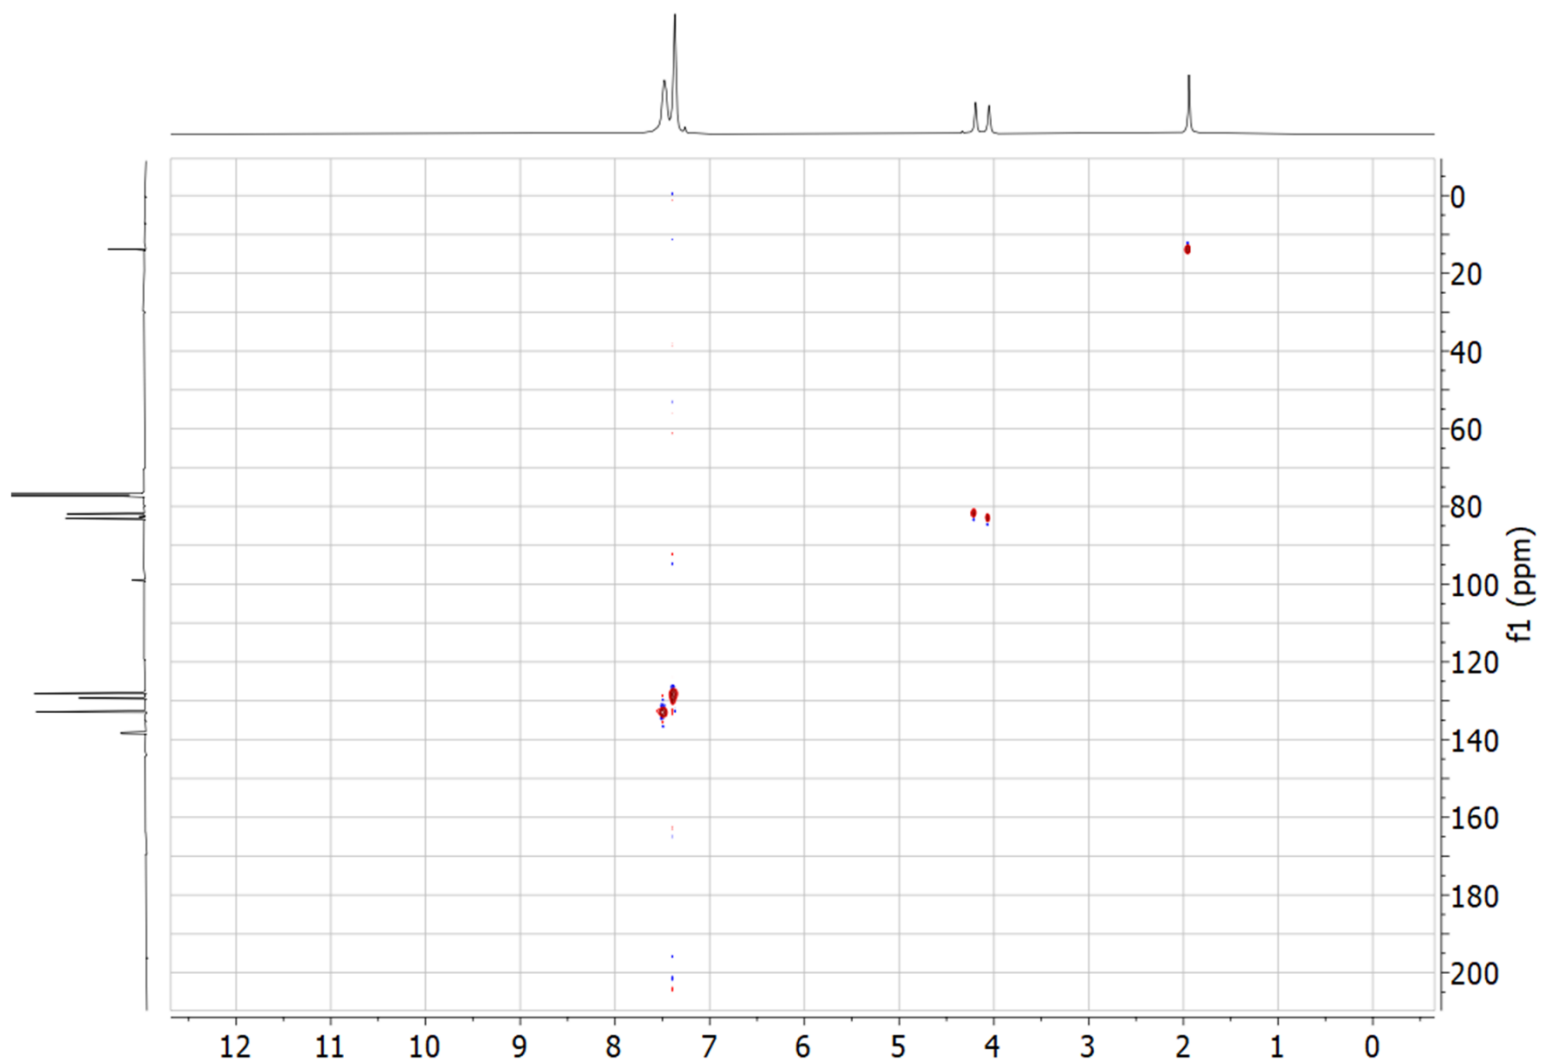

HSQC NMR (600, 150 MHz,  $\text{CDCl}_3$ , 298 K) for  $[\text{Mn}(\text{Cp}')(\text{CO})_2(\text{PPh}_3)]$ .

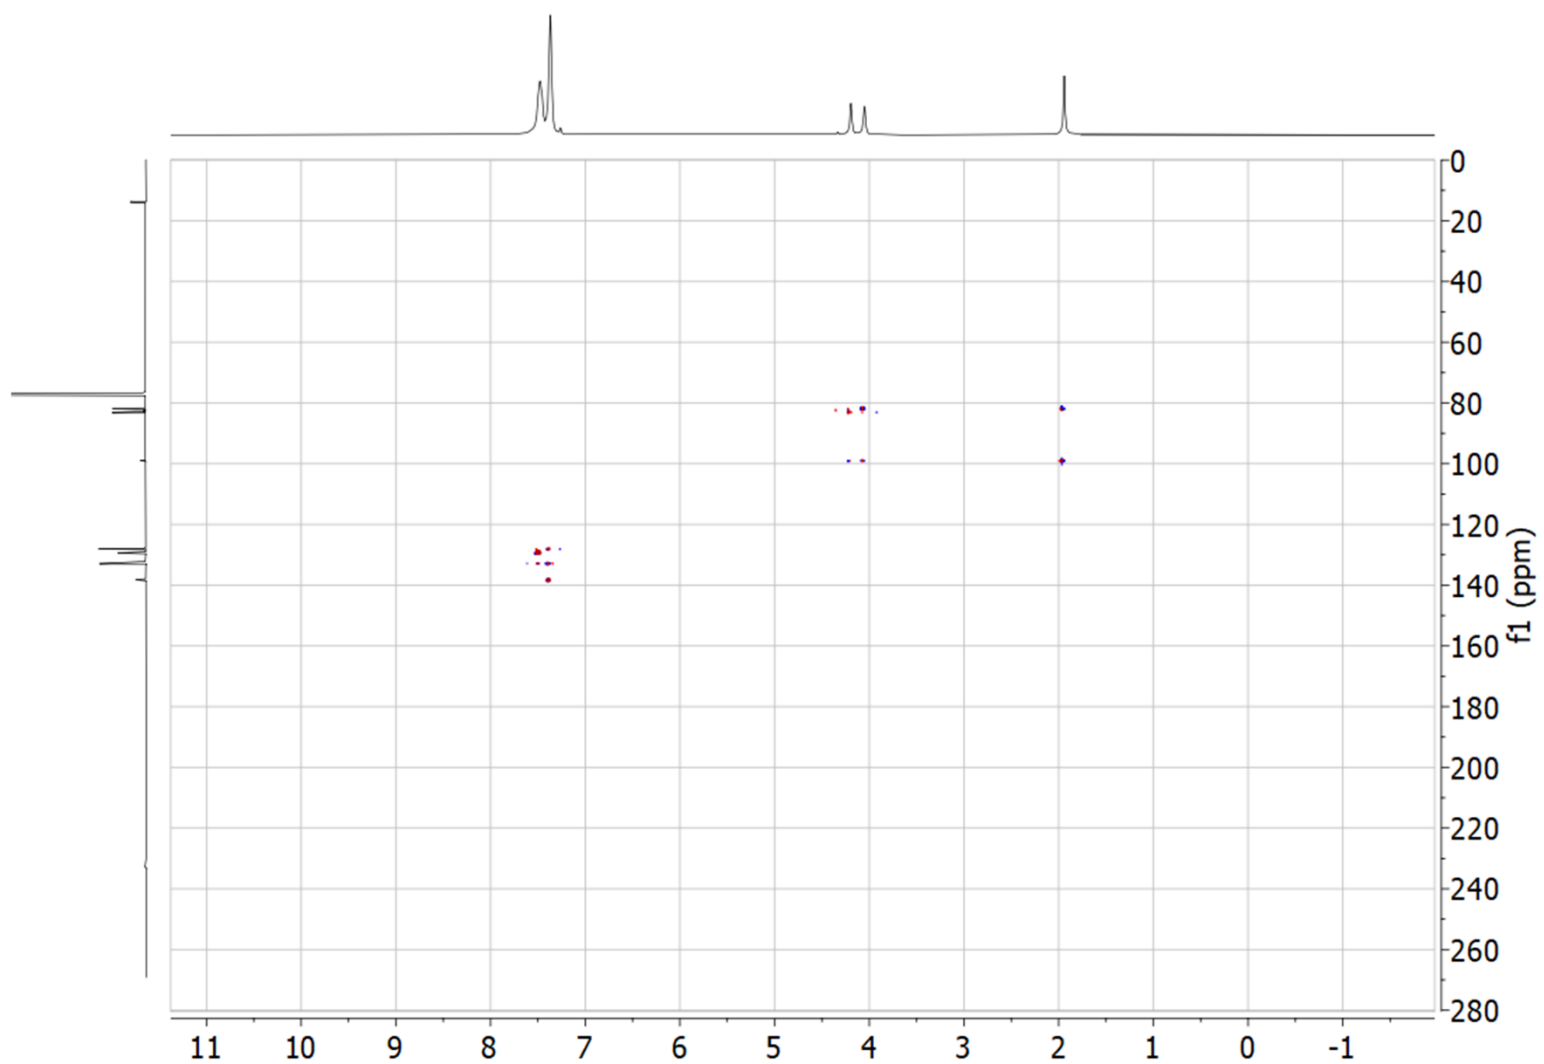

HMBC NMR (600, 150 MHz,  $\text{CDCl}_3$ , 298 K) for  $[\text{Mn}(\text{Cp}')(\text{CO})_2(\text{PPh}_3)]$ .

3247 (0.023) Is (1.00,0.10) C<sub>26</sub>H<sub>22</sub>MnO<sub>2</sub>P1: TOF MS ES+  
7.50e12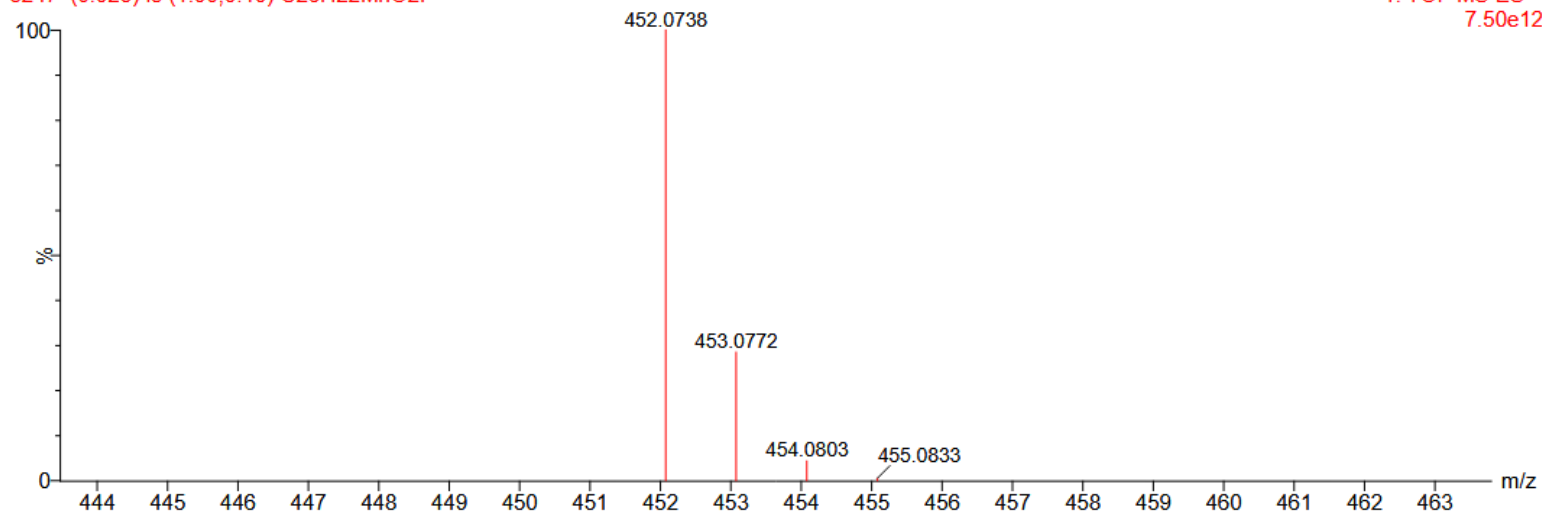

3247 70 (0.155) Cm (51:70)

1: TOF MS ES+  
1.07e6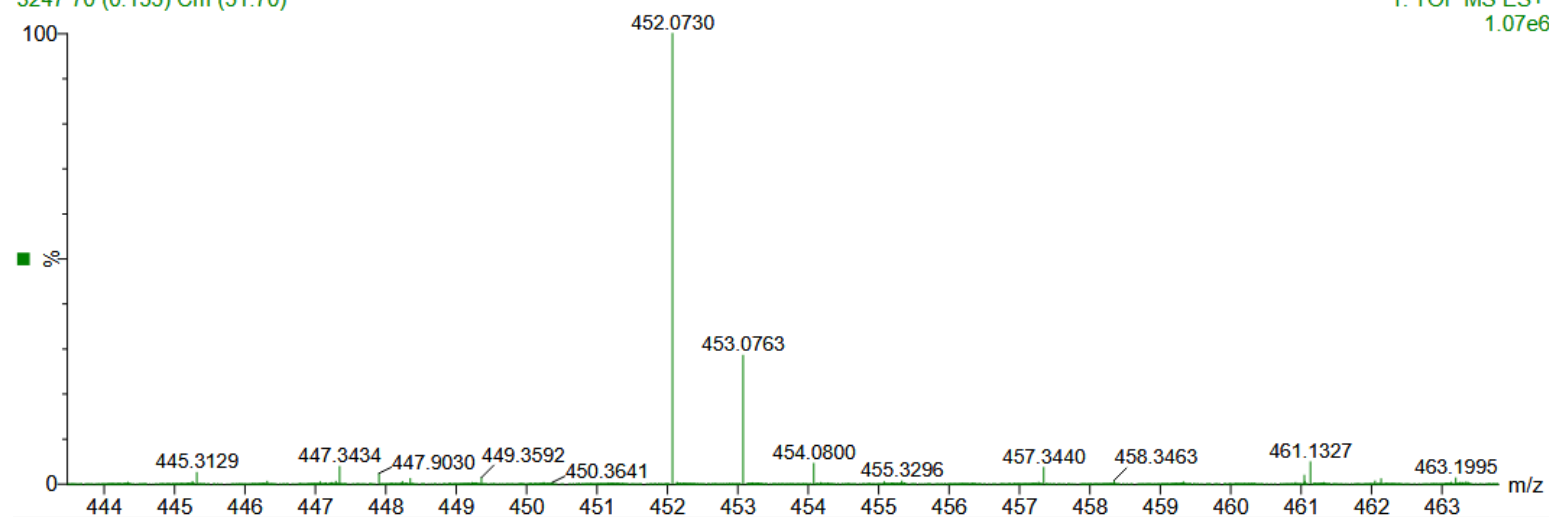High Resolution ESI-MS (+ve ion) for [Mn(Cp')(CO)<sub>2</sub>(PPh<sub>3</sub>)].

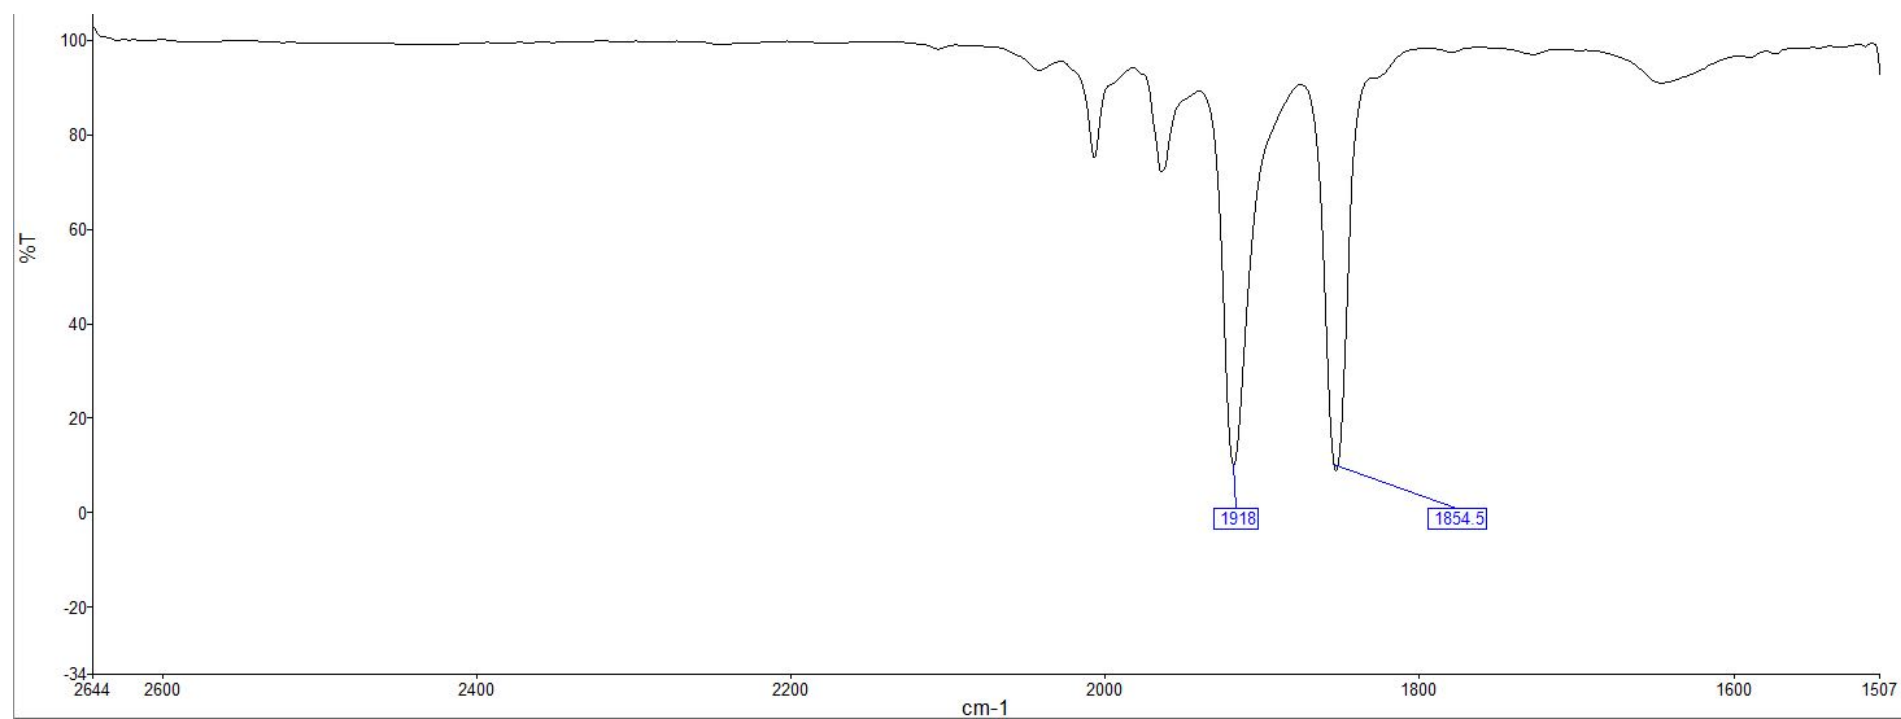

IR (THF) for  $[\text{Re}(\text{Cp}^*)(\text{CO})_2(\text{PPh}_3)]$ .

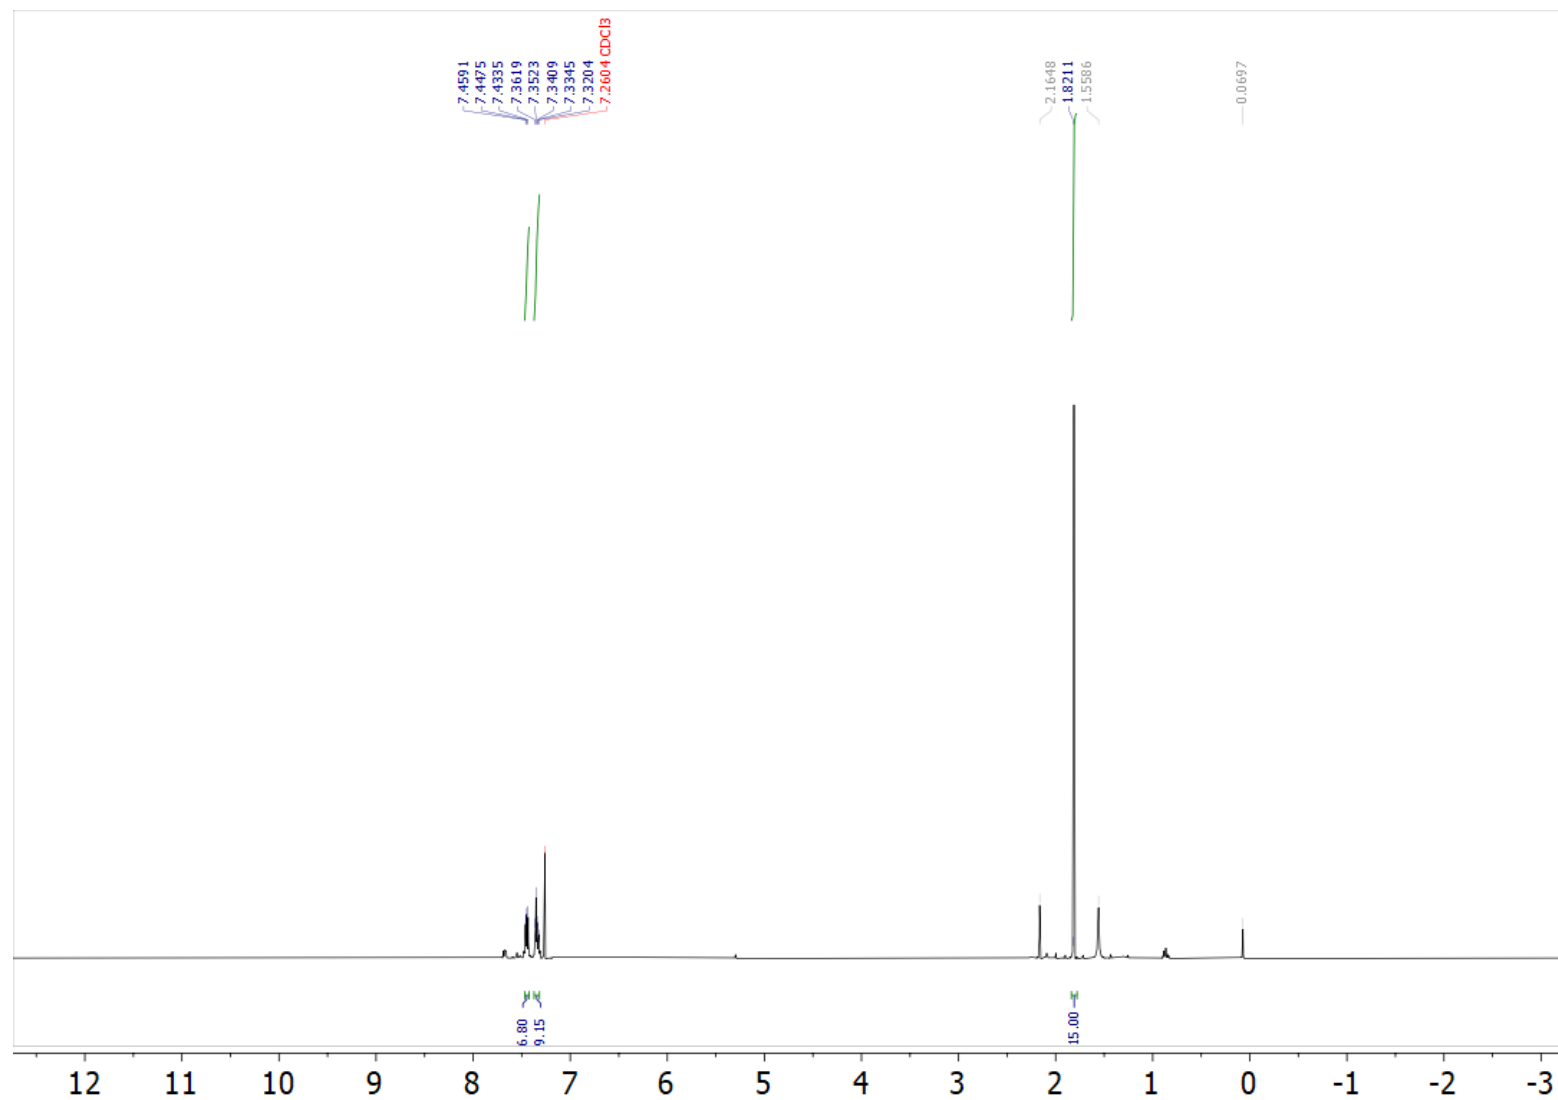

<sup>1</sup>H NMR (CDCl<sub>3</sub>, 700 MHz) for [Re(Cp\*)(CO)<sub>2</sub>(PPh<sub>3</sub>)].

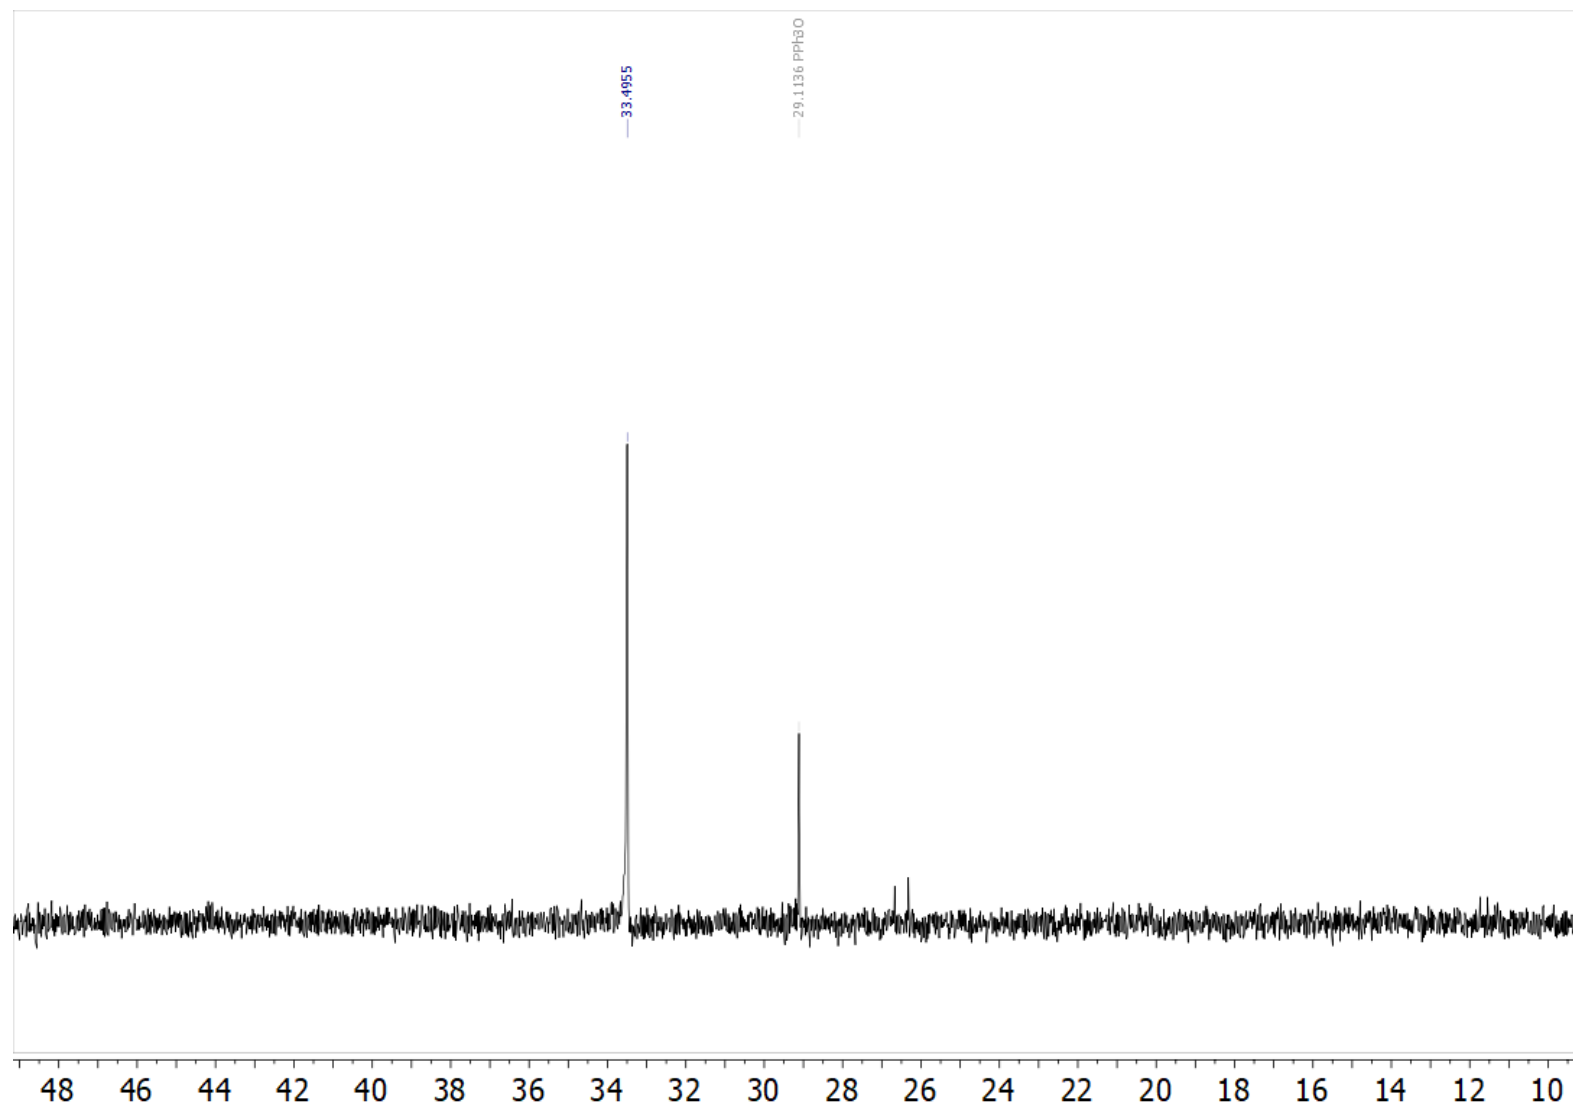

$^{31}\text{P}\{^1\text{H}\}$  NMR ( $\text{CDCl}_3$ , 283 MHz) for  $[\text{Re}(\text{Cp}^*)(\text{CO})_2(\text{PPh}_3)]$ .



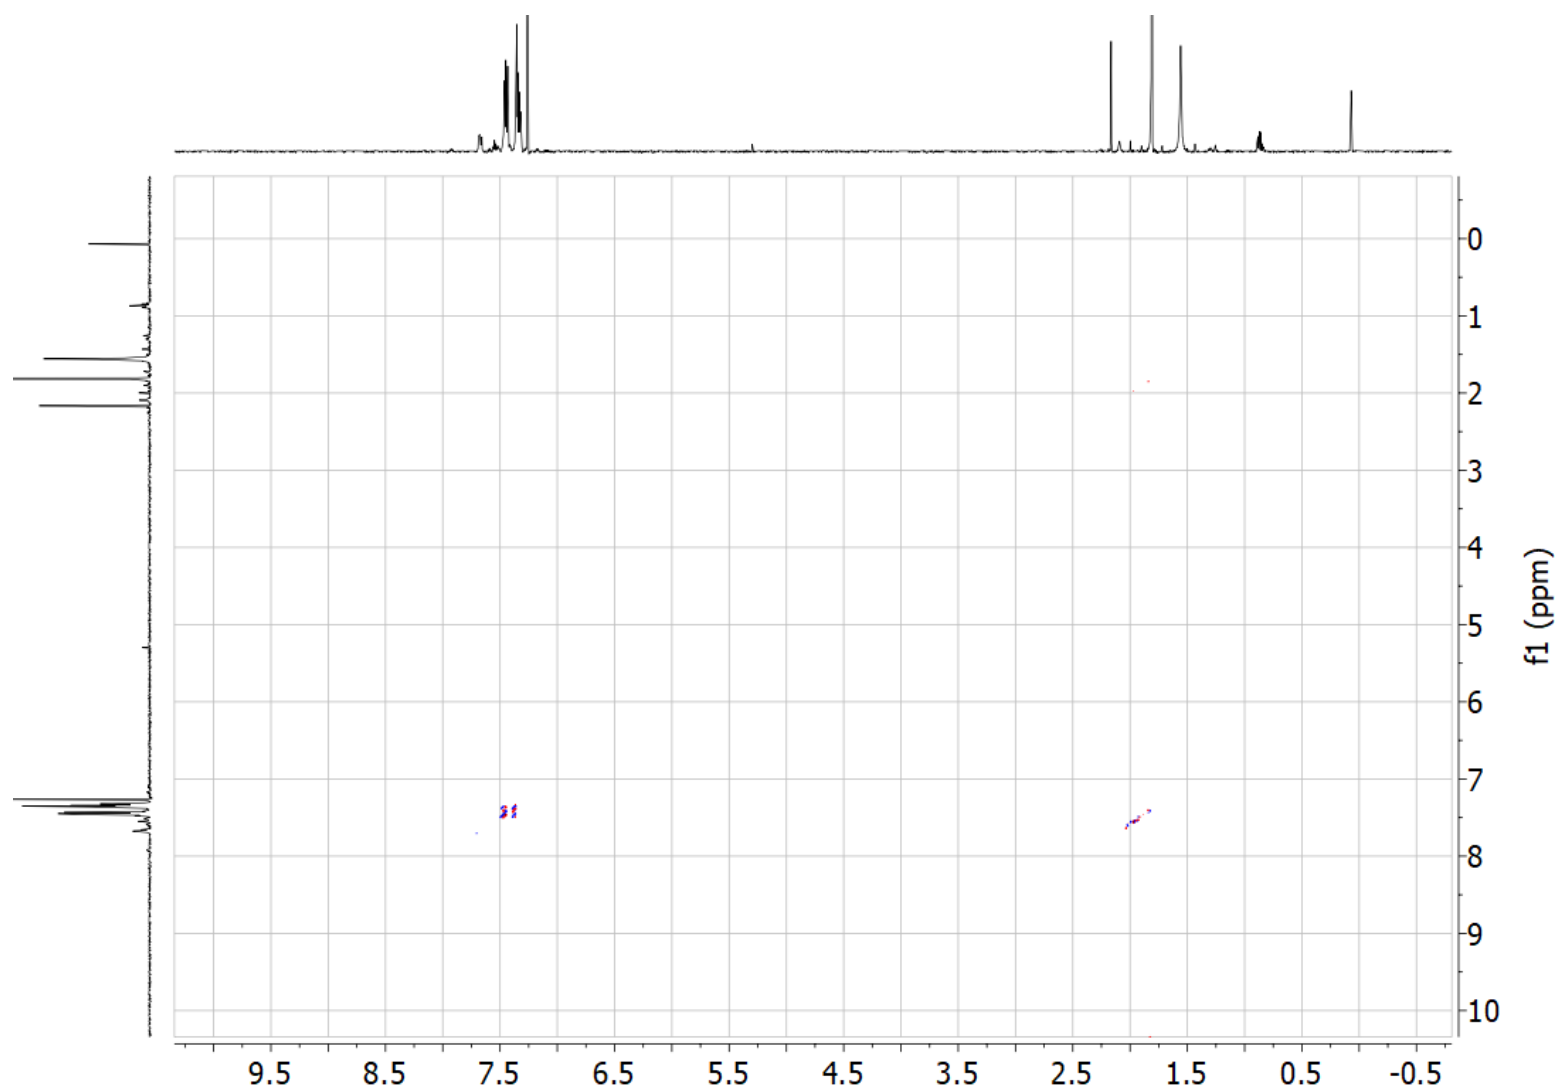

COSY (CDCl<sub>3</sub>) for [Re(Cp\*)(CO)<sub>2</sub>(PPh<sub>3</sub>)].



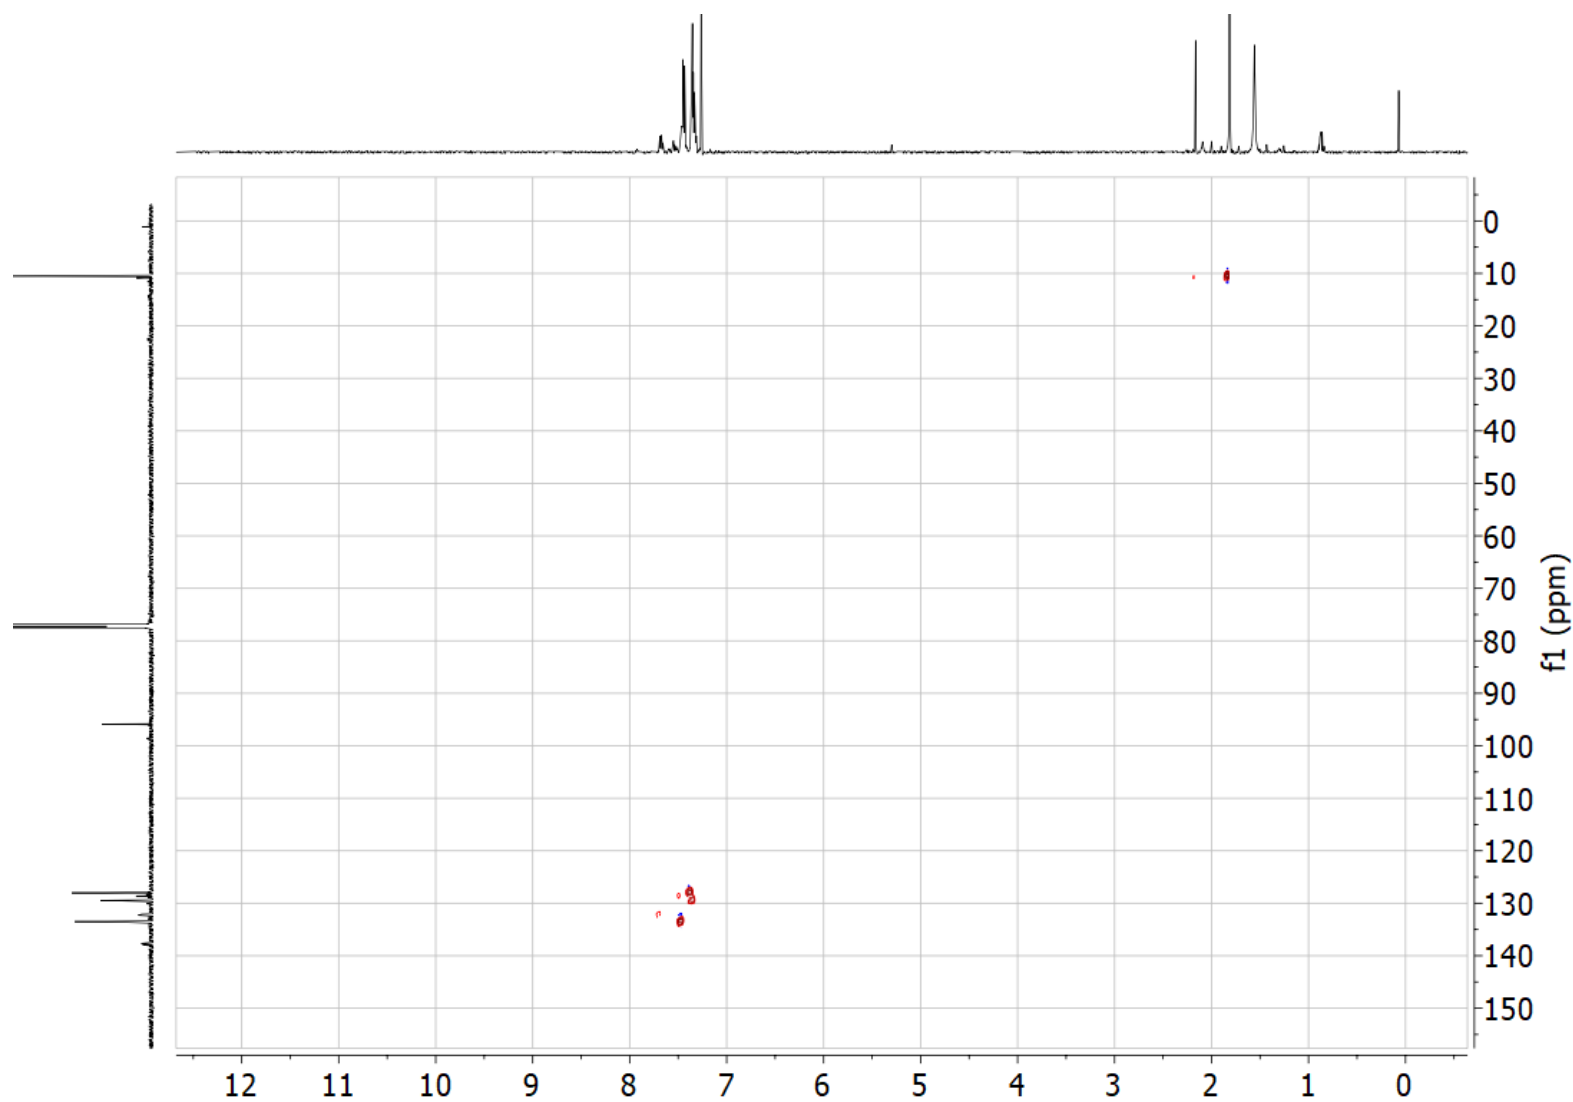

HSQC ( $\text{CDCl}_3$ ) for  $[\text{Re}(\text{Cp}^*)(\text{CO})_2(\text{PPh}_3)]$ .

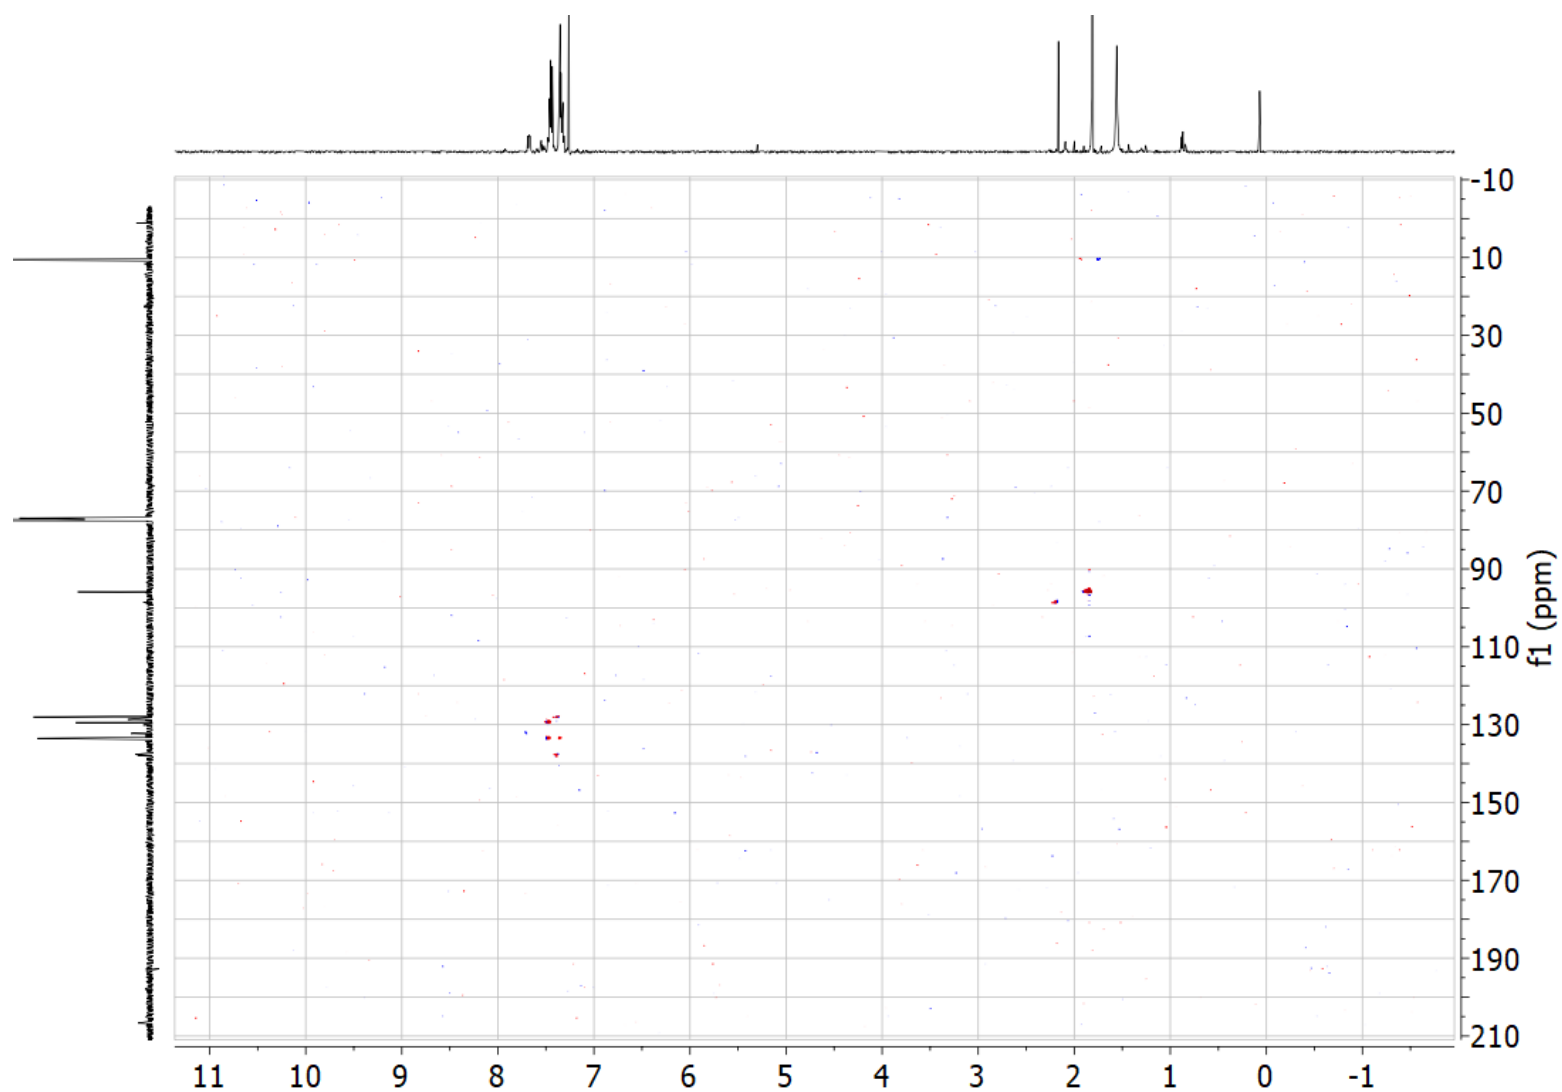

HMBC ( $\text{CDCl}_3$ ) for  $[\text{Re}(\text{Cp}^*)(\text{CO})_2(\text{PPh}_3)]$ .

3718B (0.023) Is (1.00,0.10) C<sub>30</sub>H<sub>30</sub>O<sub>2</sub>PRe1: TOF MS ES+  
4.65e12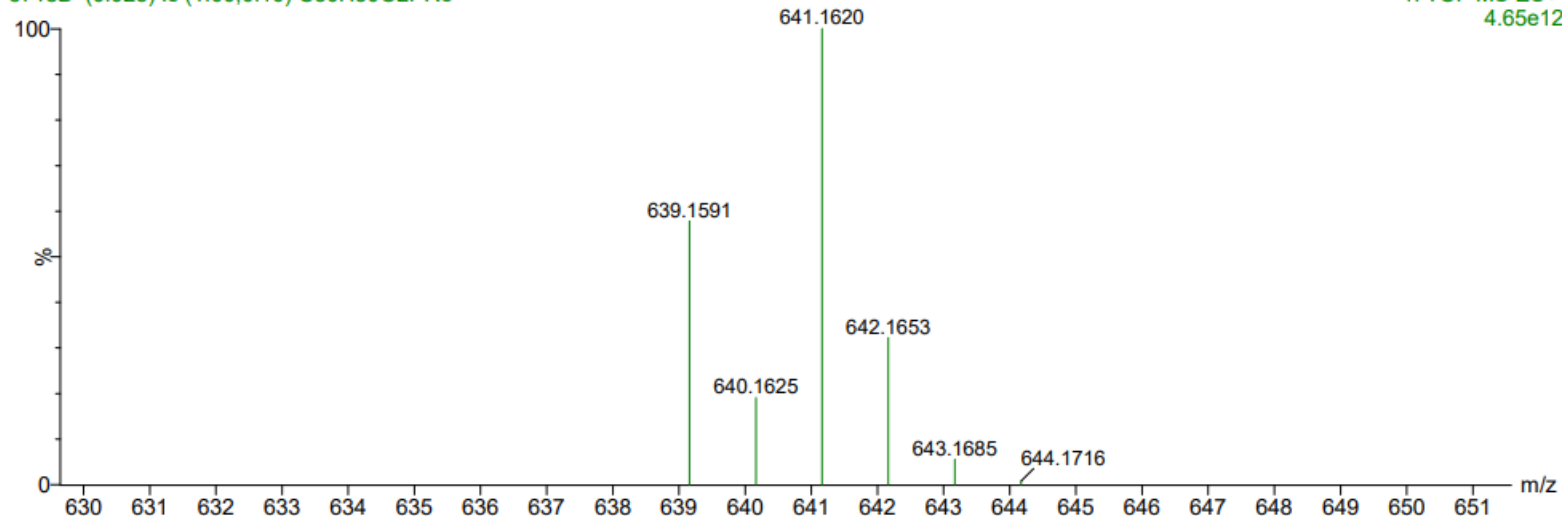

3718B 546 (1.091) Cm (544:554)

1: TOF MS ES+  
2.81e6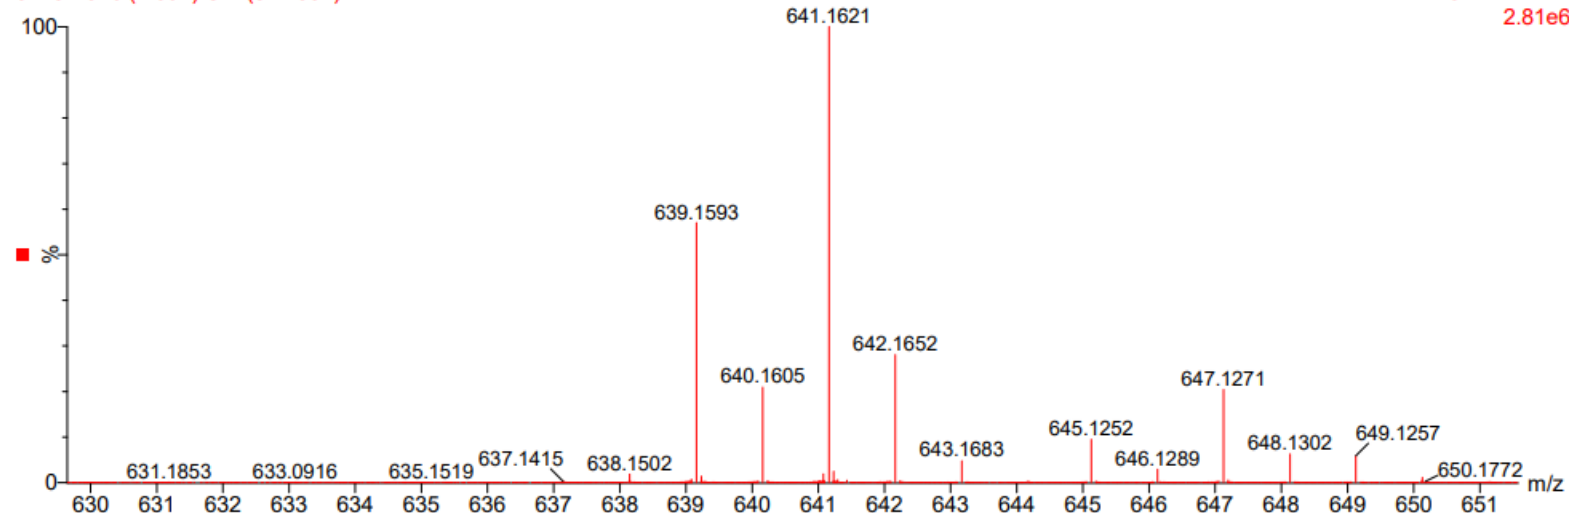High Resolution ESI-MS (+ve ion) for [Re(Cp\*)(CO)<sub>2</sub>(PPh<sub>3</sub>)].
